# Supplementary material for: Tracking cells in epithelial acini by light sheet microscopy reveals proximity effects in breast cancer initiation
Source: eLife. 2020 Jul 21;9:e54066. doi: 10.7554/eLife.54066 (PMC7373425; doi:10.7554/eLife.54066)
Supplement: Supplementary file 2. — This file was input into the source code to carry out the acinus feature analysis described in Figure 4b and Figure 4—figure supplement 1. [file elife-54066-supp2.xlsx]

## Sheet: Pos_0000_start
Detailed
====================
Position X,Position Y,Position Z,Unit,Category,Collection,Time,ID,
91.5388,74.0127,103.895,um,Surface,Position,1,3324,
82.2645,83.4152,100.977,um,Surface,Position,1,3325,
94.921,73.8812,93.8357,um,Surface,Position,1,3326,
82.9963,80.3049,104.983,um,Surface,Position,1,3327,
75.4908,83.9268,97.4187,um,Surface,Position,1,3328,
88.9118,66.9758,109.911,um,Surface,Position,1,3329,
97.5131,64.1891,102.257,um,Surface,Position,1,3330,
98.9622,72.187,83.0262,um,Surface,Position,1,3331,
101.955,64.5936,84.8562,um,Surface,Position,1,3332,
94.6206,78.1045,71.7912,um,Surface,Position,1,3333,
84.673,82.1981,93.0247,um,Surface,Position,1,3334,
89.6932,81.001,88.008,um,Surface,Position,1,3335,
90.8308,80.086,78.5072,um,Surface,Position,1,3336,
73.8114,87.4095,72.538,um,Surface,Position,1,3337,
75.4467,87.5872,64.3953,um,Surface,Position,1,3338,
92.5309,59.0229,111.441,um,Surface,Position,1,3339,
104.302,55.0958,89.7071,um,Surface,Position,1,3340,
85.6806,83.4044,71.6321,um,Surface,Position,1,3341,
79.3851,85.3366,85.8883,um,Surface,Position,1,3342,
101.582,58.6204,95.1732,um,Surface,Position,1,3343,
80.8879,75.4245,108.262,um,Surface,Position,1,3344,
92.9279,72.1043,66.5943,um,Surface,Position,1,3345,
66.4248,80.9834,103.815,um,Surface,Position,1,3346,
98.599,63.138,66.5729,um,Surface,Position,1,3347,
79.0244,66.3608,115.346,um,Surface,Position,1,3348,
85.8235,60.7489,116.918,um,Surface,Position,1,3349,
73.5376,77.0488,108.226,um,Surface,Position,1,3350,
68.0631,85.5209,93.9512,um,Surface,Position,1,3351,
84.1465,79.4277,59.736,um,Surface,Position,1,3352,
70.6778,87.8804,86.5708,um,Surface,Position,1,3353,
59.245,87.4347,91.2428,um,Surface,Position,1,3354,
104.049,43.9213,87.4478,um,Surface,Position,1,3355,
100.126,55.8398,61.7856,um,Surface,Position,1,3356,
91.8079,65.6711,53.8758,um,Surface,Position,1,3357,
105.373,53.6578,76.9697,um,Surface,Position,1,3358,
71.4024,70.513,114.415,um,Surface,Position,1,3359,
99.8952,51.9508,102.826,um,Surface,Position,1,3360,
66.3394,86.3975,79.9398,um,Surface,Position,1,3361,
75.8777,82.024,60.9246,um,Surface,Position,1,3362,
85.8615,48.1052,115.864,um,Surface,Position,1,3363,
56.953,86.1107,83.6874,um,Surface,Position,1,3364,
59.1863,82.245,101.076,um,Surface,Position,1,3365,
64.2389,74.4918,111.177,um,Surface,Position,1,3366,
101.486,42.5981,94.6002,um,Surface,Position,1,3367,
102.148,50.9962,67.692,um,Surface,Position,1,3368,
64.8624,87.4727,67.119,um,Surface,Position,1,3369,
69.0128,85.8323,59.6101,um,Surface,Position,1,3370,
95.3992,43.4425,105.793,um,Surface,Position,1,3371,
86.8684,61.7929,48.0933,um,Surface,Position,1,3372,
55.9687,86.6111,71.6407,um,Surface,Position,1,3373,
88.3204,41.4473,112.006,um,Surface,Position,1,3374,
101.047,42.0305,67.0898,um,Surface,Position,1,3375,
94.4617,54.2557,52.8826,um,Surface,Position,1,3376,
65.5305,65.5694,117.918,um,Surface,Position,1,3377,
77.5094,54.7903,119.085,um,Surface,Position,1,3378,
84.6399,69.2889,50.3569,um,Surface,Position,1,3379,
79.2885,73.694,51.1652,um,Surface,Position,1,3380,
98.7985,32.8627,86.4324,um,Surface,Position,1,3381,
54.6718,83.5006,59.3243,um,Surface,Position,1,3382,
79.9682,64.1934,44.5629,um,Surface,Position,1,3383,
58.9485,67.0643,114.068,um,Surface,Position,1,3384,
90.3276,36.0889,107.425,um,Surface,Position,1,3385,
53.6069,82.3345,93.0804,um,Surface,Position,1,3386,
62.4446,83.6137,59.8962,um,Surface,Position,1,3387,
97.7698,36.3438,93.3334,um,Surface,Position,1,3388,
100.385,37.1854,76.1932,um,Surface,Position,1,3389,
89.5188,48.2035,48.5716,um,Surface,Position,1,3390,
92.6735,31.4302,98.0823,um,Surface,Position,1,3391,
73.1481,67.187,46.9403,um,Surface,Position,1,3392,
49.2823,82.0324,74.976,um,Surface,Position,1,3393,
98.3987,35.1519,64.5805,um,Surface,Position,1,3394,
70.2052,50.0732,119.366,um,Surface,Position,1,3395,
64.7125,78.5048,52.8988,um,Surface,Position,1,3396,
64.2637,55.9595,119.029,um,Surface,Position,1,3397,
69.1365,72.9558,46.3528,um,Surface,Position,1,3398,
42.463,79.2454,83.9225,um,Surface,Position,1,3399,
50.2078,63.8772,111.125,um,Surface,Position,1,3400,
93.4749,27.4461,85.0465,um,Surface,Position,1,3401,
47.88,71.0555,104.727,um,Surface,Position,1,3402,
56.3368,56.0246,116.237,um,Surface,Position,1,3403,
60.5607,72.861,51.8277,um,Surface,Position,1,3404,
45.4239,76.2149,96.1092,um,Surface,Position,1,3405,
78.6776,39.3645,115.387,um,Surface,Position,1,3406,
92.5038,28.3085,68.7613,um,Surface,Position,1,3407,
79.1227,54.1405,45.9692,um,Surface,Position,1,3408,
93.3504,27.2146,77.2546,um,Surface,Position,1,3409,
65.0867,43.7241,117.806,um,Surface,Position,1,3410,
93.0376,42.36,54.4106,um,Surface,Position,1,3411,
49.0389,78.1759,61.5234,um,Surface,Position,1,3412,
66.2767,65.1912,45.7018,um,Surface,Position,1,3413,
71.2784,38.6401,116.449,um,Surface,Position,1,3414,
88.5924,23.8335,88.1639,um,Surface,Position,1,3415,
90.8565,35.3094,58.4911,um,Surface,Position,1,3416,
37.1604,73.5658,81.4936,um,Surface,Position,1,3417,
77.5635,31.34,108.789,um,Surface,Position,1,3418,
81.4317,26.0308,101.952,um,Surface,Position,1,3419,
62.1502,55.1606,53.322,um,Surface,Position,1,3420,
38.6047,71.8484,88.7062,um,Surface,Position,1,3421,
84.7921,41.612,47.0717,um,Surface,Position,1,3422,
41.4281,67.724,60.4805,um,Surface,Position,1,3423,
46.7864,50.0171,112.191,um,Surface,Position,1,3424,
59.1906,39.1804,115.166,um,Surface,Position,1,3425,
90.9044,28.1556,61.0596,um,Surface,Position,1,3426,
67.6868,56.0859,42.9514,um,Surface,Position,1,3427,
47.4207,70.9856,54.7491,um,Surface,Position,1,3428,
40.0745,75.5909,70.5514,um,Surface,Position,1,3429,
44.5176,59.1656,108.717,um,Surface,Position,1,3430,
62.1471,30.3367,110.349,um,Surface,Position,1,3431,
82.1697,25.2772,60.4829,um,Surface,Position,1,3432,
36.0923,66.8771,66.6419,um,Surface,Position,1,3433,
54.832,49.9016,57.0799,um,Surface,Position,1,3434,
38.1942,60.9634,101.494,um,Surface,Position,1,3435,
78.9094,34.5528,51.4149,um,Surface,Position,1,3436,
53.1614,42.5259,112.767,um,Surface,Position,1,3437,
53.5054,61.8257,46.4093,um,Surface,Position,1,3438,
34.6995,63.9594,95.0112,um,Surface,Position,1,3439,
33.7176,55.5665,94.933,um,Surface,Position,1,3440,
45.7154,59.2373,52.2384,um,Surface,Position,1,3441,
82.9809,20.9749,74.4103,um,Surface,Position,1,3442,
33.0165,61.3097,87.5414,um,Surface,Position,1,3443,
48.2198,42.4973,108.495,um,Surface,Position,1,3444,
55.6975,33.8137,112.237,um,Surface,Position,1,3445,
33.1807,65.8812,77.4499,um,Surface,Position,1,3446,
79.9535,21.0948,90.3548,um,Surface,Position,1,3447,
38.9179,54.2643,105.123,um,Surface,Position,1,3448,
73.3631,21.1801,61.6609,um,Surface,Position,1,3449,
60.6685,24.7906,104.046,um,Surface,Position,1,3450,
38.6361,58.7367,57.1453,um,Surface,Position,1,3451,
69.3773,18.2918,87.0489,um,Surface,Position,1,3452,
32.7092,58.6934,74.9394,um,Surface,Position,1,3453,
69.7255,21.8586,97.146,um,Surface,Position,1,3454,
77.1148,17.3853,78.7877,um,Surface,Position,1,3455,
38.7748,46.7657,103.599,um,Surface,Position,1,3456,
71.1719,17.5762,70.3315,um,Surface,Position,1,3457,
59.7395,37.3736,48.1104,um,Surface,Position,1,3458,
50.6206,31.1314,103.609,um,Surface,Position,1,3459,
35.7982,54.982,64.4523,um,Surface,Position,1,3460,
32.0492,52.8035,85.4522,um,Surface,Position,1,3461,
34.9013,47.4487,92.102,um,Surface,Position,1,3462,
66.6032,44.6026,43.3784,um,Surface,Position,1,3463,
52.0687,46.0222,44.8607,um,Surface,Position,1,3464,
44.5493,34.6718,101.938,um,Surface,Position,1,3465,
63.9771,30.136,51.1938,um,Surface,Position,1,3466,
56.8692,20.2281,87.1356,um,Surface,Position,1,3467,
51.552,25.4712,95.2233,um,Surface,Position,1,3468,
47.6676,40.102,51.6775,um,Surface,Position,1,3469,
64.5565,18.073,69.8607,um,Surface,Position,1,3470,
63.1385,17.2596,80.7382,um,Surface,Position,1,3471,
41.9506,47.3983,55.924,um,Surface,Position,1,3472,
37.9189,40.5772,98.0899,um,Surface,Position,1,3473,
38.7051,52.4854,58.6854,um,Surface,Position,1,3474,
46.9663,26.6802,77.3568,um,Surface,Position,1,3475,
38.8254,33.0176,91.5981,um,Surface,Position,1,3476,
42.899,39.4929,57.7778,um,Surface,Position,1,3477,
33.631,40.3614,82.6389,um,Surface,Position,1,3478,
33.6544,46.9027,67.4686,um,Surface,Position,1,3479,
50.8021,33.8,54.0416,um,Surface,Position,1,3480,
58.4807,19.4469,75.7013,um,Surface,Position,1,3481,
31.6776,46.5461,78.1475,um,Surface,Position,1,3482,
44.3045,30.8917,96.1702,um,Surface,Position,1,3483,
44.786,25.7731,85.8921,um,Surface,Position,1,3484,
39.8473,32.8149,66.9729,um,Surface,Position,1,3485,
37.0252,32.1162,78.9118,um,Surface,Position,1,3486,
44.4208,31.0816,60.2139,um,Surface,Position,1,3487,
50.4007,25.9583,62.2537,um,Surface,Position,1,3488,
34.8839,38.6217,71.3123,um,Surface,Position,1,3489,
36.9094,40.8162,61.8776,um,Surface,Position,1,3490,
60.1888,21.054,62.2606,um,Surface,Position,1,3491,

## Sheet: Pos_0001_start
Detailed
====================
Position X,Position Y,Position Z,Unit,Category,Collection,Time,ID,
48.6769,75.0347,36.6523,um,Surface,Position,1,542,
52.3052,65.6258,58.6168,um,Surface,Position,1,543,
56.749,73.4767,25.2831,um,Surface,Position,1,544,
75.3775,49.2334,30.4738,um,Surface,Position,1,545,
70.0712,52.6179,52.3628,um,Surface,Position,1,546,
60.8382,62.9434,55.0658,um,Surface,Position,1,547,
77.2921,41.8976,38.5,um,Surface,Position,1,548,
68.8613,59.2765,20.5126,um,Surface,Position,1,549,
58.9886,71.9641,30.7624,um,Surface,Position,1,550,
74.3443,57.0533,29.0842,um,Surface,Position,1,551,
61.6911,66.7967,20.5795,um,Surface,Position,1,552,
54.9729,75.1656,44.8479,um,Surface,Position,1,553,
70.018,64.9024,27.4919,um,Surface,Position,1,554,
76.706,53.0745,36.0127,um,Surface,Position,1,555,
71.8768,58.4581,46.2638,um,Surface,Position,1,556,
66.6328,66.0743,49.0996,um,Surface,Position,1,557,
66.5946,70.3392,37.6075,um,Surface,Position,1,558,
71.0347,66.5345,36.5888,um,Surface,Position,1,559,
76.2779,61.8197,37.854,um,Surface,Position,1,560,
65.9896,43.6096,59.4526,um,Surface,Position,1,561,
58.7198,50.5258,64.0623,um,Surface,Position,1,562,
60.0255,60.916,13.0266,um,Surface,Position,1,563,
63.8556,56.3086,58.3941,um,Surface,Position,1,564,
70.7975,48.9626,17.7135,um,Surface,Position,1,565,
47.298,73.8163,26.7113,um,Surface,Position,1,566,
46.0009,69.6217,52.3161,um,Surface,Position,1,567,
74.0285,39.1147,45.545,um,Surface,Position,1,568,
72.4698,41.4841,22.6874,um,Surface,Position,1,569,
43.3036,65.7631,57.9102,um,Surface,Position,1,570,
50.273,59.0162,62.235,um,Surface,Position,1,571,
70.0281,36.2871,50.8313,um,Surface,Position,1,572,
38.1122,69.7313,51.2217,um,Surface,Position,1,573,
56.7171,55.2347,9.01899,um,Surface,Position,1,574,
41.932,56.0756,60.7868,um,Surface,Position,1,575,
63.8766,54.6264,12.1041,um,Surface,Position,1,576,
38.6728,73.1896,33.7682,um,Surface,Position,1,577,
57.8685,41.6424,64.7829,um,Surface,Position,1,578,
61.442,35.0198,59.5819,um,Surface,Position,1,579,
70.9229,34.4549,28.3009,um,Surface,Position,1,580,
48.8714,48.0625,66.1376,um,Surface,Position,1,581,
68.8456,30.0068,36.7161,um,Surface,Position,1,582,
66.3581,29.0289,47.1942,um,Surface,Position,1,583,
35.266,62.159,56.1396,um,Surface,Position,1,584,
54.0381,46.2371,9.03006,um,Surface,Position,1,585,
65.3188,43.1403,12.8496,um,Surface,Position,1,586,
64.2454,21.8679,36.8424,um,Surface,Position,1,587,
34.3906,60.8751,14.68,um,Surface,Position,1,588,
43.1457,40.7928,63.7671,um,Surface,Position,1,589,
62.3997,34.6434,14.9493,um,Surface,Position,1,590,
44.6826,48.2251,8.34153,um,Surface,Position,1,591,
35.9694,50.6029,60.7334,um,Surface,Position,1,592,
61.3548,24.7847,53.7761,um,Surface,Position,1,593,
50.5028,35.6937,64.9317,um,Surface,Position,1,594,
28.4942,68.3491,32.502,um,Surface,Position,1,595,
56.1615,31.4557,61.7957,um,Surface,Position,1,596,
28.0342,65.1404,45.9205,um,Surface,Position,1,597,
31.1506,66.5055,23.1783,um,Surface,Position,1,598,
50.3841,31.4563,11.3126,um,Surface,Position,1,599,
22.7793,49.8396,53.0876,um,Surface,Position,1,600,
29.0787,43.5583,58.5278,um,Surface,Position,1,601,
35.2213,46.9488,14.0299,um,Surface,Position,1,602,
29.6288,57.6349,17.536,um,Surface,Position,1,603,
23.9055,57.9574,48.1529,um,Surface,Position,1,604,
46.571,29.077,61.5137,um,Surface,Position,1,605,
58.6371,21.3761,46.2663,um,Surface,Position,1,606,
24.1368,61.3196,27.5581,um,Surface,Position,1,607,
52.9922,24.8224,55.955,um,Surface,Position,1,608,
55.6149,36.8171,11.4798,um,Surface,Position,1,609,
38.3359,36.5822,14.3297,um,Surface,Position,1,610,
22.648,49.2844,21.1546,um,Surface,Position,1,611,
28.0533,45.5393,15.9739,um,Surface,Position,1,612,
18.5195,49.2252,39.5915,um,Surface,Position,1,613,
46.1727,28.2611,16.2263,um,Surface,Position,1,614,
39.0773,27.2365,55.3621,um,Surface,Position,1,615,
33.4617,33.7286,57.4884,um,Surface,Position,1,616,
46.8984,21.4144,51.6666,um,Surface,Position,1,617,
53.2747,22.8415,24.0981,um,Surface,Position,1,618,
29.5884,51.3938,15.1158,um,Surface,Position,1,619,
55.0086,17.7693,38.4489,um,Surface,Position,1,620,
56.1879,28.2139,16.5498,um,Surface,Position,1,621,
60.605,23.2043,26.1569,um,Surface,Position,1,622,
20.0902,56.6664,36.7017,um,Surface,Position,1,623,
32.5909,22.3674,32.8696,um,Surface,Position,1,624,
29.1143,29.3555,23.6406,um,Surface,Position,1,625,
25.2325,27.1027,39.103,um,Surface,Position,1,626,
30.1486,23.2246,41.045,um,Surface,Position,1,627,
24.6062,31.8634,30.9946,um,Surface,Position,1,628,
20.1517,40.3409,28.2267,um,Surface,Position,1,629,
21.008,38.2746,35.4724,um,Surface,Position,1,630,
42.8792,17.7778,41.8379,um,Surface,Position,1,631,
20.6251,36.3654,43.0493,um,Surface,Position,1,632,
45.1875,18.5581,30.5317,um,Surface,Position,1,633,
27.5188,38.0123,18.912,um,Surface,Position,1,634,
46.0242,22.7243,22.9181,um,Surface,Position,1,635,
32.5789,26.9244,51.5702,um,Surface,Position,1,636,
24.872,37.5491,52.4138,um,Surface,Position,1,637,

## Sheet: Pos_0002_start
Detailed
====================
Position X,Position Y,Position Z,Unit,Category,Collection,Time,ID,
58.5067,52.5297,52.6757,um,Surface,Position,1,286,
52.5904,59.9908,43.5903,um,Surface,Position,1,287,
50.2018,63.1223,44.4685,um,Surface,Position,1,288,
46.4686,58.6951,54.5489,um,Surface,Position,1,289,
63.6867,45.7205,45.418,um,Surface,Position,1,290,
52.0705,55.885,40.7932,um,Surface,Position,1,291,
59.0869,51.5377,38.6042,um,Surface,Position,1,292,
46.1965,54.6999,32.7294,um,Surface,Position,1,293,
38.8259,57.4073,52.262,um,Surface,Position,1,294,
61.5204,38.2248,57.4411,um,Surface,Position,1,295,
45.3315,52.6908,61.2554,um,Surface,Position,1,296,
56.2078,46.4836,61.108,um,Surface,Position,1,297,
38.7063,62.1103,45.3134,um,Surface,Position,1,298,
63.5025,36.9142,48.9175,um,Surface,Position,1,299,
44.2083,57.7473,40.6922,um,Surface,Position,1,300,
54.3777,37.681,66.1249,um,Surface,Position,1,301,
32.9934,54.1256,58.4071,um,Surface,Position,1,302,
61.1576,29.1512,53.2257,um,Surface,Position,1,303,
58.5268,36.8929,24.6854,um,Surface,Position,1,304,
59.4642,33.2004,59.6272,um,Surface,Position,1,305,
59.1141,31.4671,38.3354,um,Surface,Position,1,306,
52.1004,46.8892,24.7196,um,Surface,Position,1,307,
34.746,49.0424,62.8939,um,Surface,Position,1,308,
33.7194,53.5157,41.8541,um,Surface,Position,1,309,
38.9475,47.7296,27.6359,um,Surface,Position,1,310,
28.4452,49.7323,53.6538,um,Surface,Position,1,311,
59.4295,23.0033,45.2363,um,Surface,Position,1,312,
55.5614,25.5866,62.2662,um,Surface,Position,1,313,
56.7053,24.0992,45.5354,um,Surface,Position,1,314,
47.6716,34.8443,21.2588,um,Surface,Position,1,315,
31.1766,42.2891,62.4244,um,Surface,Position,1,316,
39.1158,31.598,55.464,um,Surface,Position,1,317,
56.0463,18.9746,37.7858,um,Surface,Position,1,318,
57.2433,17.6212,50.459,um,Surface,Position,1,319,
24.4009,48.5838,47.9338,um,Surface,Position,1,320,
53.042,25.3764,25.8973,um,Surface,Position,1,321,
25.8835,40.4728,56.7809,um,Surface,Position,1,322,
50.9855,20.2367,61.2848,um,Surface,Position,1,323,
30.4758,43.0975,24.5908,um,Surface,Position,1,324,
50.5048,15.5458,50.2601,um,Surface,Position,1,325,
23.2004,33.8878,56.0129,um,Surface,Position,1,326,
45.5076,16.6426,58.4386,um,Surface,Position,1,327,
20.296,43.1908,47.3363,um,Surface,Position,1,328,
46.4667,13.4425,44.7872,um,Surface,Position,1,329,
35.8816,35.4037,21.5208,um,Surface,Position,1,330,
29.0327,33.3285,62.2733,um,Surface,Position,1,331,
38.4753,14.7699,42.1913,um,Surface,Position,1,332,
33.1559,19.8199,34.7012,um,Surface,Position,1,333,
27.4655,27.1404,32.52,um,Surface,Position,1,334,
36.4083,17.3986,57.9296,um,Surface,Position,1,335,
19.9606,32.9139,42.7961,um,Surface,Position,1,336,
44.2987,15.1207,34.2348,um,Surface,Position,1,337,
23.0951,33.0523,32.7079,um,Surface,Position,1,338,
30.1416,19.0911,44.7412,um,Surface,Position,1,339,
28.522,24.4216,55.4434,um,Surface,Position,1,340,
25.4701,18.8668,41.8469,um,Surface,Position,1,341,
20.4921,28.1185,45.421,um,Surface,Position,1,342,
22.8014,24.8536,42.7348,um,Surface,Position,1,343,

## Sheet: Pos_0003_start
Detailed
====================
Position X,Position Y,Position Z,Unit,Category,Collection,Time,ID,
68.4547,75.0224,60.1246,um,Surface,Position,1,263,
70.4914,79.8839,40.0423,um,Surface,Position,1,264,
75.526,77.9697,33.4974,um,Surface,Position,1,265,
94.1845,52.6507,52.6923,um,Surface,Position,1,266,
87.2578,67.7101,28.4066,um,Surface,Position,1,267,
76.8715,68.561,65.6725,um,Surface,Position,1,268,
78.2451,75.2256,44.525,um,Surface,Position,1,269,
76.701,75.6844,56.8416,um,Surface,Position,1,270,
72.2176,79.2231,51.1522,um,Surface,Position,1,271,
82.2106,66.3321,64.7444,um,Surface,Position,1,272,
88.7509,62.0935,56.7284,um,Surface,Position,1,273,
93.7581,63.7462,43.5266,um,Surface,Position,1,274,
90.3032,69.6754,36.2049,um,Surface,Position,1,275,
84.0451,73.9314,54.6411,um,Surface,Position,1,276,
86.4562,74.1283,45.7436,um,Surface,Position,1,277,
65.3622,70.5577,65.4906,um,Surface,Position,1,278,
64.0104,78.9993,49.4084,um,Surface,Position,1,279,
97.3479,54.8261,42.1547,um,Surface,Position,1,280,
79.985,73.2049,31.5728,um,Surface,Position,1,281,
87.2616,51.6976,61.9717,um,Surface,Position,1,282,
90.7919,60.0607,30.1868,um,Surface,Position,1,283,
79.1955,65.7004,21.0404,um,Surface,Position,1,284,
92.3965,52.3197,25.6574,um,Surface,Position,1,285,
67.5494,64.1124,71.0551,um,Surface,Position,1,286,
92.7014,45.2535,53.8794,um,Surface,Position,1,287,
77.2226,55.7712,71.1948,um,Surface,Position,1,288,
89.7652,37.278,57.0718,um,Surface,Position,1,289,
54.5494,74.1282,57.1326,um,Surface,Position,1,290,
71.133,51.8103,74.8341,um,Surface,Position,1,291,
91.7603,45.2689,31.0643,um,Surface,Position,1,292,
94.3553,43.1706,42.7413,um,Surface,Position,1,293,
67.4609,53.8263,84.3813,um,Surface,Position,1,294,
75.0036,43.3041,73.1954,um,Surface,Position,1,295,
50.37,75.1386,43.3429,um,Surface,Position,1,296,
88.7477,44.1279,18.9295,um,Surface,Position,1,297,
81.1583,55.23,16.1849,um,Surface,Position,1,298,
57.5392,65.1936,69.6057,um,Surface,Position,1,299,
61.5885,76.8601,36.5243,um,Surface,Position,1,300,
47.4892,73.3476,53.569,um,Surface,Position,1,301,
52.9115,71.5702,29.9491,um,Surface,Position,1,302,
67.1978,65.1557,18.5647,um,Surface,Position,1,303,
64.2113,70.3438,22.6646,um,Surface,Position,1,304,
60.8292,52.2197,73.7002,um,Surface,Position,1,305,
82.1735,37.8361,65.2708,um,Surface,Position,1,306,
47.7105,67.0622,63.4324,um,Surface,Position,1,307,
73.1514,56.333,12.5149,um,Surface,Position,1,308,
88.9556,35.3146,26.2994,um,Surface,Position,1,309,
69.0954,41.7926,76.1758,um,Surface,Position,1,310,
48.8443,58.4653,69.4352,um,Surface,Position,1,311,
85.8057,29.3966,51.7674,um,Surface,Position,1,312,
89.2246,32.5553,33.378,um,Surface,Position,1,313,
72.0109,33.1698,69.3997,um,Surface,Position,1,314,
61.1564,46.5619,73.0638,um,Surface,Position,1,315,
66.9999,52.0312,12.2934,um,Surface,Position,1,316,
76.3945,45.6024,15.1132,um,Surface,Position,1,317,
45.338,69.1852,31.9622,um,Surface,Position,1,318,
46.1507,49.6619,71.1255,um,Surface,Position,1,319,
40.9103,69.3947,42.2211,um,Surface,Position,1,320,
43.1805,61.2537,63.2842,um,Surface,Position,1,321,
77.8164,19.9824,42.1606,um,Surface,Position,1,322,
78.4621,22.6358,31.9504,um,Surface,Position,1,323,
79.5977,26.7558,35.4004,um,Surface,Position,1,324,
82.6024,29.8856,23.7943,um,Surface,Position,1,325,
60.029,52.1689,24.284,um,Surface,Position,1,326,
78.8952,25.1082,55.6058,um,Surface,Position,1,327,
73.739,29.031,19.1413,um,Surface,Position,1,328,
77.0421,19.8396,49.6954,um,Surface,Position,1,329,
57.9307,57.8968,16.9888,um,Surface,Position,1,330,
69.4479,36.2403,15.5615,um,Surface,Position,1,331,
66.7937,25.7939,63.7617,um,Surface,Position,1,332,
32.1964,56.9889,49.7777,um,Surface,Position,1,333,
52.6074,36.2595,72.5291,um,Surface,Position,1,334,
73.0014,24.5538,25.3998,um,Surface,Position,1,335,
55.5844,33.2316,68.4586,um,Surface,Position,1,336,
46.5556,58.1618,23.2075,um,Surface,Position,1,337,
38.0003,53.6604,64.252,um,Surface,Position,1,338,
48.0135,46.2723,23.1031,um,Surface,Position,1,339,
39.8688,49.5601,30.0647,um,Surface,Position,1,340,
62.8809,33.4827,17.4091,um,Surface,Position,1,341,
41.114,57.7079,32.8579,um,Surface,Position,1,342,
65.963,21.1992,56.484,um,Surface,Position,1,343,
57.0111,30.2644,23.3646,um,Surface,Position,1,344,
62.4575,42.7713,14.6399,um,Surface,Position,1,345,
67.601,16.9335,49.1563,um,Surface,Position,1,346,
64.9666,26.0877,23.4961,um,Surface,Position,1,347,
35.654,58.3305,41.8293,um,Surface,Position,1,348,
51.6276,49.5273,17.3193,um,Surface,Position,1,349,
29.7351,48.7271,49.0097,um,Surface,Position,1,350,
32.3893,47.2843,57.3979,um,Surface,Position,1,351,
59.9923,25.9227,28.537,um,Surface,Position,1,352,
40.6347,39.1776,66.3497,um,Surface,Position,1,353,
50.2505,35.6766,23.5438,um,Surface,Position,1,354,
57.6634,21.4839,58.2723,um,Surface,Position,1,355,
53.1047,20.994,52.8436,um,Surface,Position,1,356,
33.8574,45.2674,34.0132,um,Surface,Position,1,357,
59.7248,24.459,35.121,um,Surface,Position,1,358,
43.615,37.4034,31.0283,um,Surface,Position,1,359,
43.5802,29.4448,63.44,um,Surface,Position,1,360,
56.5714,19.3399,42.1595,um,Surface,Position,1,361,
34.2911,36.9153,47.3372,um,Surface,Position,1,362,
46.9915,22.9258,57.1638,um,Surface,Position,1,363,
45.4628,30.6556,30.8478,um,Surface,Position,1,364,
52.9976,25.8901,33.7878,um,Surface,Position,1,365,
31.8165,46.0107,38.732,um,Surface,Position,1,366,
30.5099,36.4381,26.4025,um,Surface,Position,1,367,
39.2876,31.2376,37.373,um,Surface,Position,1,368,
40.6084,24.9654,52.0712,um,Surface,Position,1,369,
34.5738,39.2756,32.0676,um,Surface,Position,1,370,
35.5133,33.4116,33.8719,um,Surface,Position,1,371,
45.9351,20.9972,36.949,um,Surface,Position,1,372,
21.5476,36.8329,44.9875,um,Surface,Position,1,373,
18.8896,41.6094,45.8513,um,Surface,Position,1,374,
36.6372,28.7326,46.7548,um,Surface,Position,1,375,
34.9955,33.9262,55.0312,um,Surface,Position,1,376,

## Sheet: Pos_0004_start
Detailed
====================
Position X,Position Y,Position Z,Unit,Category,Collection,Time,ID,
66.2058,66.0112,103.969,um,Surface,Position,1,271,
57.5667,81.473,83.2669,um,Surface,Position,1,272,
86.544,64.2552,63.8683,um,Surface,Position,1,273,
89.5766,52.9321,86.4947,um,Surface,Position,1,274,
63.4355,82.2404,77.6001,um,Surface,Position,1,275,
89.8441,56.7559,78.1181,um,Surface,Position,1,276,
67.7802,72.7924,96.5247,um,Surface,Position,1,277,
81.1482,61.575,94.8206,um,Surface,Position,1,278,
86.9297,62.3801,85.5472,um,Surface,Position,1,279,
66.2037,78.3745,89.4905,um,Surface,Position,1,280,
74.2095,80.0944,69.1515,um,Surface,Position,1,281,
82.4097,73.4514,70.98,um,Surface,Position,1,282,
80.791,74.3522,78.6992,um,Surface,Position,1,283,
73.7622,80.4794,77.2277,um,Surface,Position,1,284,
87.2718,68.0747,76.6641,um,Surface,Position,1,285,
77.6172,74.2057,91.2249,um,Surface,Position,1,286,
56.3445,82.2288,68.2052,um,Surface,Position,1,287,
90.9138,45.8648,72.16,um,Surface,Position,1,288,
72.8714,71.491,52.2917,um,Surface,Position,1,289,
89.2542,54.6464,69.2861,um,Surface,Position,1,290,
73.5505,76.2317,61.3547,um,Surface,Position,1,291,
81.6108,66.5667,57.7425,um,Surface,Position,1,292,
88.9369,48.2625,62.3201,um,Surface,Position,1,293,
89.2518,45.4316,82.0118,um,Surface,Position,1,294,
75.0787,65.0543,48.3921,um,Surface,Position,1,295,
54.4209,76.5525,92.9766,um,Surface,Position,1,296,
82.5729,49.4116,96.8431,um,Surface,Position,1,297,
81.1069,59.8652,50.8637,um,Surface,Position,1,298,
84.0743,39.7214,91.2022,um,Surface,Position,1,299,
55.5814,67.4991,103.2,um,Surface,Position,1,300,
58.3923,77.6833,54.7984,um,Surface,Position,1,301,
48.4586,81.7449,73.3082,um,Surface,Position,1,302,
68.7468,57.4314,104.965,um,Surface,Position,1,303,
92.6972,40.4197,75.9979,um,Surface,Position,1,304,
89.4392,34.2897,74.9315,um,Surface,Position,1,305,
87.7912,40.2389,61.4806,um,Surface,Position,1,306,
44.3903,78.499,82.8848,um,Surface,Position,1,307,
66.4141,45.8795,109.692,um,Surface,Position,1,308,
78.1474,41.8153,96.5165,um,Surface,Position,1,309,
64.7248,71.008,46.1927,um,Surface,Position,1,310,
46.6208,65.7843,101.26,um,Surface,Position,1,311,
80.0603,47.9133,48.2776,um,Surface,Position,1,312,
72.2304,40.3629,103.401,um,Surface,Position,1,313,
74.6774,55.7941,44.3835,um,Surface,Position,1,314,
48.5213,77.8908,57.9832,um,Surface,Position,1,315,
54.7952,59.4962,106.652,um,Surface,Position,1,316,
88.338,30.9068,66.4465,um,Surface,Position,1,317,
85.1231,28.1495,79.4276,um,Surface,Position,1,318,
39.4494,69.2464,95.7093,um,Surface,Position,1,319,
60.4692,65.5457,42.952,um,Surface,Position,1,320,
77.7986,34.3615,96.9049,um,Surface,Position,1,321,
52.153,73.941,49.3128,um,Surface,Position,1,322,
41.2769,59.5076,102.788,um,Surface,Position,1,323,
69.8832,32.7542,102.446,um,Surface,Position,1,324,
42.093,73.3846,55.3897,um,Surface,Position,1,325,
52.7603,47.1471,109.148,um,Surface,Position,1,326,
83.3768,29.5974,88.9021,um,Surface,Position,1,327,
81.8757,39.8376,52.1857,um,Surface,Position,1,328,
68.3711,47.9819,40.6703,um,Surface,Position,1,329,
38.1989,74.9392,62.9145,um,Surface,Position,1,330,
84.8717,32.8794,60.6535,um,Surface,Position,1,331,
48.2409,68.5385,46.2724,um,Surface,Position,1,332,
45.4937,46.2347,106.91,um,Surface,Position,1,333,
81.1576,21.7159,74.373,um,Surface,Position,1,334,
60.2704,36.6608,106.827,um,Surface,Position,1,335,
36.2412,62.6467,95.7598,um,Surface,Position,1,336,
62.1507,55.8436,39.6062,um,Surface,Position,1,337,
32.9918,72.1824,75.1278,um,Surface,Position,1,338,
70.1556,34.2537,47.3021,um,Surface,Position,1,339,
53.0179,55.7259,39.5005,um,Surface,Position,1,340,
29.8087,66.0827,81.9095,um,Surface,Position,1,341,
40.1665,66.8118,49.2073,um,Surface,Position,1,342,
68.8939,24.7464,98.3411,um,Surface,Position,1,343,
78.6833,32.3839,51.8082,um,Surface,Position,1,344,
51.4387,32.6,103.627,um,Surface,Position,1,345,
69.9486,16.1059,88.0083,um,Surface,Position,1,346,
31.4861,56.0635,93.9074,um,Surface,Position,1,347,
27.7003,66.0156,73.5869,um,Surface,Position,1,348,
37.3804,46.9306,101.009,um,Surface,Position,1,349,
66.0469,39.4571,42.6064,um,Surface,Position,1,350,
27.7624,63.1553,66.2793,um,Surface,Position,1,351,
72.4406,17.6792,83.8556,um,Surface,Position,1,352,
74.1513,17.6286,70.1114,um,Surface,Position,1,353,
28.2487,59.6202,88.2424,um,Surface,Position,1,354,
77.0083,20.7297,64.4896,um,Surface,Position,1,355,
57.3358,26.3616,101.569,um,Surface,Position,1,356,
50.3154,41.7441,41.5254,um,Surface,Position,1,357,
68.2255,13.9698,73.6226,um,Surface,Position,1,358,
60.2036,32.0567,45.1905,um,Surface,Position,1,359,
69.5648,22.9078,54.7085,um,Surface,Position,1,360,
43.9759,54.4401,42.7392,um,Surface,Position,1,361,
43.0154,37.4287,102.821,um,Surface,Position,1,362,
52.0815,35.6084,44.4903,um,Surface,Position,1,363,
67.7758,15.8525,64.2135,um,Surface,Position,1,364,
50.0092,23.3848,98.3581,um,Surface,Position,1,365,
62.3868,14.5232,82.7195,um,Surface,Position,1,366,
54.6029,19.2147,94.7696,um,Surface,Position,1,367,
29.222,46.6112,92.2124,um,Surface,Position,1,368,
25.4329,47.2214,83.9986,um,Surface,Position,1,369,
61.1116,21.4515,52.7729,um,Surface,Position,1,370,
23.5885,52.504,76.1785,um,Surface,Position,1,371,
36.8207,48.1627,47.169,um,Surface,Position,1,372,
42.4062,28.4319,96.8926,um,Surface,Position,1,373,
28.7789,54.1143,56.0253,um,Surface,Position,1,374,
60.1956,16.191,61.2205,um,Surface,Position,1,375,
47.1302,18.4333,89.4362,um,Surface,Position,1,376,
23.333,49.6582,67.337,um,Surface,Position,1,377,
55.7582,14.1225,79.7952,um,Surface,Position,1,378,
54.3826,26.7771,51.66,um,Surface,Position,1,379,
43.1664,39.3637,45.9174,um,Surface,Position,1,380,
44.3163,30.6629,49.1414,um,Surface,Position,1,381,
39.5146,23.3572,90.6655,um,Surface,Position,1,382,
28.1064,45.6338,57.3108,um,Surface,Position,1,383,
36.0873,29.5246,91.3539,um,Surface,Position,1,384,
30.9547,33.4108,89.4556,um,Surface,Position,1,385,
56.2902,13.5902,68.4398,um,Surface,Position,1,386,
42.195,25.2913,55.1415,um,Surface,Position,1,387,
44.0227,17.9018,76.128,um,Surface,Position,1,388,
32.4992,37.2712,53.7008,um,Surface,Position,1,389,
51.9003,17.7006,59.1398,um,Surface,Position,1,390,
48.0564,15.0866,81.4175,um,Surface,Position,1,391,
24.3931,44.6133,69.9543,um,Surface,Position,1,392,
28.3693,35.056,69.0172,um,Surface,Position,1,393,
39.6096,19.4201,66.4968,um,Surface,Position,1,394,
36.1117,29.4691,56.0313,um,Surface,Position,1,395,
29.0761,34.5422,59.1871,um,Surface,Position,1,396,
26.8287,34.6604,79.5939,um,Surface,Position,1,397,
45.6854,17.7528,63.8629,um,Surface,Position,1,398,

## Sheet: Pos_0005_start
Detailed
====================
Position X,Position Y,Position Z,Unit,Category,Collection,Time,ID,
120.363,65.1751,55.7038,um,Surface,Position,1,332,
97.8074,88.8549,57.2807,um,Surface,Position,1,333,
110.461,85.5116,30.8425,um,Surface,Position,1,334,
94.1288,93.9211,50.6195,um,Surface,Position,1,335,
104.965,85.4515,58.1786,um,Surface,Position,1,336,
121.157,68.3377,52.1025,um,Surface,Position,1,337,
124.372,68.5876,45.0317,um,Surface,Position,1,338,
104.736,91.9791,42.8281,um,Surface,Position,1,339,
115.015,76.5388,59.3895,um,Surface,Position,1,340,
121.204,74.9582,47.4205,um,Surface,Position,1,341,
117.356,80.3409,51.065,um,Surface,Position,1,342,
124.51,147.002,44.5931,um,Surface,Position,1,343,
91.3568,86.1697,61.5718,um,Surface,Position,1,344,
90.5814,92.9798,43.2132,um,Surface,Position,1,345,
95.2423,92.3052,31.6459,um,Surface,Position,1,346,
85.7366,92.9588,58.4754,um,Surface,Position,1,347,
114.399,77.5847,29.1389,um,Surface,Position,1,348,
119.991,59.6999,43.5028,um,Surface,Position,1,349,
113.052,67.0345,62.7345,um,Surface,Position,1,350,
98.6854,86.0847,21.4305,um,Surface,Position,1,351,
88.3154,93.6235,35.956,um,Surface,Position,1,352,
107.762,66.114,64.9588,um,Surface,Position,1,353,
83.7439,83.3423,68.1813,um,Surface,Position,1,354,
117.545,64.1986,28.2657,um,Surface,Position,1,355,
109.52,75.9072,21.1533,um,Surface,Position,1,356,
81.9807,94.864,46.0269,um,Surface,Position,1,357,
98.4795,78.7361,15.8678,um,Surface,Position,1,358,
75.0387,93.1689,43.3901,um,Surface,Position,1,359,
116.053,54.6542,55.2124,um,Surface,Position,1,360,
83.6287,71.4708,74.7378,um,Surface,Position,1,361,
83.344,91.2129,30.1965,um,Surface,Position,1,362,
84.6592,87.8223,21.8004,um,Surface,Position,1,363,
96.2302,69.8117,73.5197,um,Surface,Position,1,364,
72.8269,87.2195,55.2946,um,Surface,Position,1,365,
98.064,60.7627,66.42,um,Surface,Position,1,366,
114.281,53.0113,34.2122,um,Surface,Position,1,367,
85.2541,83.4982,26.1727,um,Surface,Position,1,368,
107.509,59.2426,16.1058,um,Surface,Position,1,369,
75.1478,76.2046,70.1878,um,Surface,Position,1,370,
91.3312,60.9376,75.1696,um,Surface,Position,1,371,
89.0822,78.9081,15.8967,um,Surface,Position,1,372,
108.957,48.0281,55.0932,um,Surface,Position,1,373,
99.2705,65.2097,10.6081,um,Surface,Position,1,374,
76.373,84.648,33.2663,um,Surface,Position,1,375,
101.913,49.0823,60.9393,um,Surface,Position,1,376,
108.305,52.6977,23.0189,um,Surface,Position,1,377,
66.3969,83.8331,57.9954,um,Surface,Position,1,378,
81.8462,76.5575,16.6615,um,Surface,Position,1,379,
106.675,45.6193,33.0755,um,Surface,Position,1,380,
92.4052,68.0579,14.8872,um,Surface,Position,1,381,
107.681,44.1139,46.3051,um,Surface,Position,1,382,
91.9786,52.6354,70.9473,um,Surface,Position,1,383,
63.6615,81.9498,31.4509,um,Surface,Position,1,384,
96.7047,43.8157,57.4927,um,Surface,Position,1,385,
74.48,77.0143,25.0835,um,Surface,Position,1,386,
101.482,52.1183,18.5685,um,Surface,Position,1,387,
62.5502,84.5835,49.1404,um,Surface,Position,1,388,
73.9067,59.2871,71.3333,um,Surface,Position,1,389,
101.841,44.0875,24.455,um,Surface,Position,1,390,
61.5886,79.2995,45.6622,um,Surface,Position,1,391,
80.9786,55.2737,74.3714,um,Surface,Position,1,392,
81.0495,48.8712,67.7877,um,Surface,Position,1,393,
62.345,68.9742,65.7541,um,Surface,Position,1,394,
92.7048,52.8555,14.8508,um,Surface,Position,1,395,
99.1749,39.6264,46.1259,um,Surface,Position,1,396,
69.4801,64.201,65.9498,um,Surface,Position,1,397,
95.1446,39.4819,31.7403,um,Surface,Position,1,398,
88.4563,42.264,63.4873,um,Surface,Position,1,399,
86.3518,45.9778,53.151,um,Surface,Position,1,400,
84.8674,62.4745,14.8963,um,Surface,Position,1,401,
58.5501,75.048,53.8292,um,Surface,Position,1,402,
75.0215,67.3212,17.3026,um,Surface,Position,1,403,
56.4647,73.8133,41.9768,um,Surface,Position,1,404,
58.1748,72.3495,36.3149,um,Surface,Position,1,405,
93.6815,35.4203,43.5639,um,Surface,Position,1,406,
67.5319,69.3417,29.173,um,Surface,Position,1,407,
81.7923,49.7862,18.442,um,Surface,Position,1,408,
84.0109,42.9313,56.4272,um,Surface,Position,1,409,
55.0324,68.6031,53.3144,um,Surface,Position,1,410,
70.3416,50.3453,64.5666,um,Surface,Position,1,411,
91.6168,45.0955,20.0242,um,Surface,Position,1,412,
85.4748,35.7795,38.1071,um,Surface,Position,1,413,
60.2253,64.0073,36.2979,um,Surface,Position,1,414,
73.8398,45.1105,55.9161,um,Surface,Position,1,415,
58.1783,65.2798,28.957,um,Surface,Position,1,416,
87.1241,38.1233,29.3779,um,Surface,Position,1,417,
55.9954,54.2749,54.4991,um,Surface,Position,1,418,
55.0012,61.365,45.5967,um,Surface,Position,1,419,
59.5123,58.5812,62.475,um,Surface,Position,1,420,
71.712,52.9588,20.9994,um,Surface,Position,1,421,
80.9865,42.3469,23.7435,um,Surface,Position,1,422,
73.256,40.3691,33.5456,um,Surface,Position,1,423,
77.5045,37.9794,42.2447,um,Surface,Position,1,424,
60.8649,48.5572,50.4833,um,Surface,Position,1,425,
56.4978,54.5134,43.841,um,Surface,Position,1,426,
68.7722,42.5954,48.0018,um,Surface,Position,1,427,
29.6279,11.5933,28.8612,um,Surface,Position,1,428,
67.0647,42.1877,38.5795,um,Surface,Position,1,429,
64.6557,47.7344,31.0721,um,Surface,Position,1,430,
61.5925,57.396,30.006,um,Surface,Position,1,431,
57.8241,53.7452,37.0621,um,Surface,Position,1,432,

## Sheet: Pos_0006_start
Detailed
====================
Position X,Position Y,Position Z,Unit,Category,Collection,Time,ID,
102.035,73.4709,50.0021,um,Surface,Position,1,564,
95.7229,78.7621,53.5596,um,Surface,Position,1,565,
83.7118,96.866,34.4047,um,Surface,Position,1,566,
107.712,61.5605,72.908,um,Surface,Position,1,567,
114.086,61.6776,50.6154,um,Surface,Position,1,568,
90.8678,84.4095,52.5923,um,Surface,Position,1,569,
99.0699,75.9663,59.9115,um,Surface,Position,1,570,
77.6219,97.3984,53.7951,um,Surface,Position,1,571,
109.183,70.6032,41.6981,um,Surface,Position,1,572,
100.625,71.0283,73.6265,um,Surface,Position,1,573,
96.0015,87.6635,38.6786,um,Surface,Position,1,574,
89.5881,93.5334,36.5064,um,Surface,Position,1,575,
81.3859,93.097,73.1313,um,Surface,Position,1,576,
87.4841,89.7145,70.2511,um,Surface,Position,1,577,
83.8663,99.211,49.0487,um,Surface,Position,1,578,
107.368,79.9042,38.6432,um,Surface,Position,1,579,
101.536,88.3946,47.1032,um,Surface,Position,1,580,
99.0285,84.2097,57.8101,um,Surface,Position,1,581,
94.2395,82.7833,79.3183,um,Surface,Position,1,582,
95.4141,92.0508,44.8225,um,Surface,Position,1,583,
93.533,94.336,57.4251,um,Surface,Position,1,584,
97.156,84.1568,72.4378,um,Surface,Position,1,585,
112.651,74.4691,53.3884,um,Surface,Position,1,586,
104.047,79.2923,69.13,um,Surface,Position,1,587,
100.595,92.967,52.7443,um,Surface,Position,1,588,
108.695,85.7677,44.8716,um,Surface,Position,1,589,
72.5408,93.6845,67.9658,um,Surface,Position,1,590,
91.2164,73.4601,77.5971,um,Surface,Position,1,591,
81.032,94.6184,40.9133,um,Surface,Position,1,592,
84.3583,85.905,61.7001,um,Surface,Position,1,593,
88.6042,77.8602,70.9459,um,Surface,Position,1,594,
101.921,64.1787,78.4859,um,Surface,Position,1,595,
76.2575,99.6903,34.5096,um,Surface,Position,1,596,
80.4254,86.9966,71.9257,um,Surface,Position,1,597,
95.4833,80.2588,46.0802,um,Surface,Position,1,598,
106.126,73.9448,33.6473,um,Surface,Position,1,599,
106.014,68.8648,64.9295,um,Surface,Position,1,600,
75.7441,100.404,44.675,um,Surface,Position,1,601,
108.361,67.4858,54.9108,um,Surface,Position,1,602,
96.3477,74.8881,35.3468,um,Surface,Position,1,603,
99.9653,66.5581,61.0799,um,Surface,Position,1,604,
98.0335,78.3338,26.0819,um,Surface,Position,1,605,
80.0574,92.501,30.3864,um,Surface,Position,1,606,
95.7028,76.4752,66.7322,um,Surface,Position,1,607,
88.9997,88.304,26.4408,um,Surface,Position,1,608,
82.0473,81.7509,78.6373,um,Surface,Position,1,609,
80.3935,96.0699,27.3633,um,Surface,Position,1,610,
91.1559,80.3521,59.2444,um,Surface,Position,1,611,
80.9171,88.8111,55.2961,um,Surface,Position,1,612,
79.1348,87.7575,62.8432,um,Surface,Position,1,613,
84.3004,88.823,47.9229,um,Surface,Position,1,614,
87.2143,81.4078,67.0944,um,Surface,Position,1,615,
107.268,62.9047,37.1042,um,Surface,Position,1,616,
69.6805,98.9965,35.1997,um,Surface,Position,1,617,
100.325,68.0609,40.0692,um,Surface,Position,1,618,
77.9364,78.876,72.0654,um,Surface,Position,1,619,
91.0016,82.0495,32.8283,um,Surface,Position,1,620,
79.4918,92.4648,21.5348,um,Surface,Position,1,621,
103.893,64.9701,46.3074,um,Surface,Position,1,622,
63.3702,98.6663,56.9211,um,Surface,Position,1,623,
110.663,56.1713,56.4815,um,Surface,Position,1,624,
105.627,57.4077,64.5878,um,Surface,Position,1,625,
95.2247,63.4552,81.2288,um,Surface,Position,1,626,
76.9728,91.5516,44.4616,um,Surface,Position,1,627,
85.0688,88.3398,34.9957,um,Surface,Position,1,628,
99.3749,55.437,70.3468,um,Surface,Position,1,629,
107.65,56.6694,32.1435,um,Surface,Position,1,630,
76.8412,75.6057,82.7408,um,Surface,Position,1,631,
84.6073,83.551,24.4707,um,Surface,Position,1,632,
62.4796,92.9417,67.0654,um,Surface,Position,1,633,
72.9108,91.8793,55.7713,um,Surface,Position,1,634,
80.9534,69.2252,79.4398,um,Surface,Position,1,635,
110.965,52.8324,43.7669,um,Surface,Position,1,636,
106.04,50.6003,66.2421,um,Surface,Position,1,637,
67.5365,93.4982,62.7706,um,Surface,Position,1,638,
70.6429,84.2928,68.4093,um,Surface,Position,1,639,
100.574,53.9064,78.5286,um,Surface,Position,1,640,
61.4582,104.132,33.2146,um,Surface,Position,1,641,
91.2139,61.1625,71.4112,um,Surface,Position,1,642,
95.1707,50.4379,84.8801,um,Surface,Position,1,643,
67.6048,90.6988,50.2422,um,Surface,Position,1,644,
56.4069,95.1555,60.635,um,Surface,Position,1,645,
71.9645,89.876,29.4953,um,Surface,Position,1,646,
66.3413,92.3025,34.2859,um,Surface,Position,1,647,
82.5221,65.4621,84.6586,um,Surface,Position,1,648,
109.032,45.7682,51.1125,um,Surface,Position,1,649,
59.2878,97.1701,46.3234,um,Surface,Position,1,650,
62.0851,94.6223,50.3071,um,Surface,Position,1,651,
102.687,50.5729,57.943,um,Surface,Position,1,652,
64.1303,97.8313,39.7783,um,Surface,Position,1,653,
83.7955,60.0118,86.9381,um,Surface,Position,1,654,
89.7252,69.1506,19.6458,um,Surface,Position,1,655,
104.299,45.008,43.0173,um,Surface,Position,1,656,
57.0489,91.2485,49.8934,um,Surface,Position,1,657,
55.0004,90.2651,67.5352,um,Surface,Position,1,658,
70.061,72.8673,77.0482,um,Surface,Position,1,659,
74.4116,87.3421,21.9751,um,Surface,Position,1,660,
105.352,42.1979,67.5526,um,Surface,Position,1,661,
100.402,55.5524,37.7006,um,Surface,Position,1,662,
55.5032,96.8015,36.769,um,Surface,Position,1,663,
59.6885,88.7719,56.9688,um,Surface,Position,1,664,
89.3626,73.949,26.9134,um,Surface,Position,1,665,
98.3381,68.0595,29.7787,um,Surface,Position,1,666,
72.9267,64.8148,83.8522,um,Surface,Position,1,667,
84.2239,76.5002,16.4555,um,Surface,Position,1,668,
70.786,65.8326,80.5366,um,Surface,Position,1,669,
84.6134,56.7866,77.4457,um,Surface,Position,1,670,
80.148,55.7428,86.2076,um,Surface,Position,1,671,
61.347,79.5574,76.9835,um,Surface,Position,1,672,
85.3935,51.1891,85.1585,um,Surface,Position,1,673,
56.7104,95.297,24.1214,um,Surface,Position,1,674,
67.2928,88.0693,20.6006,um,Surface,Position,1,675,
98.6302,58.0016,27.1773,um,Surface,Position,1,676,
98.6635,45.7438,70.4967,um,Surface,Position,1,677,
73.9355,60.185,90.2165,um,Surface,Position,1,678,
65.2117,72.6957,82.8203,um,Surface,Position,1,679,
48.8841,94.8492,48.595,um,Surface,Position,1,680,
59.2659,87.4866,28.3694,um,Surface,Position,1,681,
69.7393,81.2877,12.175,um,Surface,Position,1,682,
69.1155,80.8569,19.7719,um,Surface,Position,1,683,
96.8488,43.1409,49.5654,um,Surface,Position,1,684,
56.2664,90.3582,41.6049,um,Surface,Position,1,685,
95.2748,38.0023,73.5643,um,Surface,Position,1,686,
53.6519,85.6295,59.7517,um,Surface,Position,1,687,
92.4366,57.611,22.585,um,Surface,Position,1,688,
99.6971,41.3555,60.9832,um,Surface,Position,1,689,
46.3665,97.4596,37.2681,um,Surface,Position,1,690,
94.0169,39.3327,79.404,um,Surface,Position,1,691,
92.3988,50.8997,70.4203,um,Surface,Position,1,692,
63.4817,74.1222,72.1402,um,Surface,Position,1,693,
60.89,67.2072,76.4557,um,Surface,Position,1,694,
84.9431,57.9824,24.0876,um,Surface,Position,1,695,
102.353,31.7301,59.938,um,Surface,Position,1,696,
59.7951,82.5103,65.6022,um,Surface,Position,1,697,
56.3771,90.0636,21.3977,um,Surface,Position,1,698,
75.5762,74.7238,17.1273,um,Surface,Position,1,699,
102.646,37.4741,45.308,um,Surface,Position,1,700,
49.2008,93.963,44.9387,um,Surface,Position,1,701,
54.9733,75.5508,66.907,um,Surface,Position,1,702,
104.513,36.4979,52.7671,um,Surface,Position,1,703,
90.2887,47.9729,76.6813,um,Surface,Position,1,704,
82.2715,68.3348,17.6304,um,Surface,Position,1,705,
93.8892,42.8598,37.6003,um,Surface,Position,1,706,
72.2439,66.848,16.1844,um,Surface,Position,1,707,
91.0396,33.2803,70.0529,um,Surface,Position,1,708,
78.9774,41.7418,78.4596,um,Surface,Position,1,709,
48.0949,84.0328,42.7564,um,Surface,Position,1,710,
54.1611,64.9984,81.6395,um,Surface,Position,1,711,
50.1417,78.7852,58.852,um,Surface,Position,1,712,
40.5661,92.4824,39.1191,um,Surface,Position,1,713,
51.5584,84.0986,35.3841,um,Surface,Position,1,714,
97.2945,40.6457,32.3737,um,Surface,Position,1,715,
54.0422,72.7439,72.1479,um,Surface,Position,1,716,
63.0549,81.8632,22.7256,um,Surface,Position,1,717,
59.4552,84.3349,16.89,um,Surface,Position,1,718,
74.9648,57.901,16.6542,um,Surface,Position,1,719,
93.4822,32.5461,50.2201,um,Surface,Position,1,720,
94.9871,27.4638,50.1232,um,Surface,Position,1,721,
82.6562,37.1261,79.9519,um,Surface,Position,1,722,
88.6658,38.7505,51.4108,um,Surface,Position,1,723,
83.7615,40.4562,66.5527,um,Surface,Position,1,724,
60.245,53.2549,86.7485,um,Surface,Position,1,725,
94.5881,28.2655,63.1328,um,Surface,Position,1,726,
88.8624,48.2357,25.5599,um,Surface,Position,1,727,
56.8022,79.6056,20.8611,um,Surface,Position,1,728,
48.1115,72.3505,76.8464,um,Surface,Position,1,729,
43.2569,88.7203,32.1087,um,Surface,Position,1,730,
64.585,74.0362,11.8075,um,Surface,Position,1,731,
72.0918,39.6358,79.9808,um,Surface,Position,1,732,
61.0584,49.0855,78.3763,um,Surface,Position,1,733,
42.785,83.7279,25.9691,um,Surface,Position,1,734,
37.8909,82.549,46.6079,um,Surface,Position,1,735,
70.4222,63.3771,7.8217,um,Surface,Position,1,736,
79.7955,50.9204,23.5534,um,Surface,Position,1,737,
42.1961,79.1804,57.8274,um,Surface,Position,1,738,
50.5523,63.8756,75.685,um,Surface,Position,1,739,
84.5859,50.427,17.0737,um,Surface,Position,1,740,
95.0465,31.5601,39.8769,um,Surface,Position,1,741,
49.1493,81.4372,23.1519,um,Surface,Position,1,742,
80.4798,30.2763,79.9837,um,Surface,Position,1,743,
61.5078,69.0479,20.314,um,Surface,Position,1,744,
67.7608,54.1154,21.2337,um,Surface,Position,1,745,
44.1811,71.1258,40.841,um,Surface,Position,1,746,
42.8623,76.3708,41.2357,um,Surface,Position,1,747,
47.5912,77.6622,17.3182,um,Surface,Position,1,748,
83.7778,30.3333,52.3378,um,Surface,Position,1,749,
77.2654,34.9053,66.85,um,Surface,Position,1,750,
60.6198,47.1542,81.5887,um,Surface,Position,1,751,
65.6002,63.1506,18.9319,um,Surface,Position,1,752,
52.5389,75.1404,10.8908,um,Surface,Position,1,753,
83.647,39.4944,30.6284,um,Surface,Position,1,754,
45.6937,76.5421,33.7286,um,Surface,Position,1,755,
58.555,70.2767,12.747,um,Surface,Position,1,756,
65.2174,65.6106,10.0994,um,Surface,Position,1,757,
77.3028,24.8654,69.0158,um,Surface,Position,1,758,
34.4412,75.5481,41.176,um,Surface,Position,1,759,
70.0055,33.9727,67.462,um,Surface,Position,1,760,
79.4896,38.6124,46.4937,um,Surface,Position,1,761,
43.3311,64.5643,68.5065,um,Surface,Position,1,762,
42.3562,76.1095,24.4534,um,Surface,Position,1,763,
85.0048,29.7896,37.8886,um,Surface,Position,1,764,
78.3586,38.5301,35.906,um,Surface,Position,1,765,
72.646,47.7376,26.0544,um,Surface,Position,1,766,
38.1076,79.1376,29.1819,um,Surface,Position,1,767,
67.1744,35.0521,79.7922,um,Surface,Position,1,768,
78.8161,32.8911,55.9749,um,Surface,Position,1,769,
43.0724,68.869,60.0065,um,Surface,Position,1,770,
42.5947,60.4439,47.8239,um,Surface,Position,1,771,
48.2335,50.8058,68.376,um,Surface,Position,1,772,
71.8851,26.6325,73.2413,um,Surface,Position,1,773,
46.6975,66.3163,26.13,um,Surface,Position,1,774,
72.2221,33.5,60.8185,um,Surface,Position,1,775,
73.1322,43.6696,15.6884,um,Surface,Position,1,776,
78.1567,26.7501,59.8117,um,Surface,Position,1,777,
61.9831,37.6397,76.4697,um,Surface,Position,1,778,
57.1882,61.2826,10.1824,um,Surface,Position,1,779,
68.207,49.7901,15.508,um,Surface,Position,1,780,
52.9116,67.3306,19.2957,um,Surface,Position,1,781,
74.438,40.6346,27.1875,um,Surface,Position,1,782,
52.9192,52.3411,74.8282,um,Surface,Position,1,783,
57.7392,49.6883,20.4789,um,Surface,Position,1,784,
77.3488,24.3995,47.3324,um,Surface,Position,1,785,
50.3275,59.2698,22.913,um,Surface,Position,1,786,
43.2603,66.8532,20.1669,um,Surface,Position,1,787,
38.9299,69.0434,32.5821,um,Surface,Position,1,788,
66.8398,44.9215,20.0815,um,Surface,Position,1,789,
72.6036,31.5041,51.0184,um,Surface,Position,1,790,
58.173,54.8728,11.4688,um,Surface,Position,1,791,
58.2076,52.1773,27.3509,um,Surface,Position,1,792,
38.7112,62.0327,58.9338,um,Surface,Position,1,793,
56.6506,56.9709,18.3442,um,Surface,Position,1,794,
38.0527,69.7334,50.6359,um,Surface,Position,1,795,
59.4073,39.4366,62.3734,um,Surface,Position,1,796,
59.4086,43.4871,24.6052,um,Surface,Position,1,797,
32.9693,57.7102,47.7191,um,Surface,Position,1,798,
63.0336,27.5185,57.2069,um,Surface,Position,1,799,
57.0144,43.3753,33.6439,um,Surface,Position,1,800,
66.2729,23.8922,67.8345,um,Surface,Position,1,801,
50.08,42.5187,69.0507,um,Surface,Position,1,802,
74.4217,29.6614,31.8129,um,Surface,Position,1,803,
44.8783,57.8488,30.7135,um,Surface,Position,1,804,
68.8863,37.0321,36.6217,um,Surface,Position,1,805,
40.9725,65.2668,39.8578,um,Surface,Position,1,806,
46.9096,46.2773,76.2322,um,Surface,Position,1,807,
62.1886,40.5279,39.8053,um,Surface,Position,1,808,
71.7287,25.9911,43.403,um,Surface,Position,1,809,
38.1701,45.1197,65.2586,um,Surface,Position,1,810,
50.1953,43.1657,26.3544,um,Surface,Position,1,811,
55.8077,40.884,20.2987,um,Surface,Position,1,812,
63.0743,37.1496,22.8811,um,Surface,Position,1,813,
43.299,50.1187,31.8656,um,Surface,Position,1,814,
40.7952,52.2365,52.6173,um,Surface,Position,1,815,
64.9283,29.0817,35.226,um,Surface,Position,1,816,
61.3559,34.3908,54.7052,um,Surface,Position,1,817,
63.5489,23.9267,54.5216,um,Surface,Position,1,818,
42.8746,50.4814,44.3402,um,Surface,Position,1,819,
63.2244,28.9398,46.5737,um,Surface,Position,1,820,
46.0073,46.2923,58.7948,um,Surface,Position,1,821,
55.2638,32.4125,69.4673,um,Surface,Position,1,822,
49.5733,31.2084,42.0097,um,Surface,Position,1,823,
46.314,32.0359,55.0674,um,Surface,Position,1,824,
36.5698,41.4098,43.8777,um,Surface,Position,1,825,
42.3229,39.0002,39.8609,um,Surface,Position,1,826,
38.7755,37.9282,49.62,um,Surface,Position,1,827,
48.89,35.5006,36.3236,um,Surface,Position,1,828,
51.8471,25.5197,57.6558,um,Surface,Position,1,829,
53.9461,27.2176,47.3767,um,Surface,Position,1,830,
47.8692,35.4977,49.1419,um,Surface,Position,1,831,
36.0498,45.6837,55.4332,um,Surface,Position,1,832,
51.5154,35.0154,61.4994,um,Surface,Position,1,833,
35.3365,52.9906,57.5659,um,Surface,Position,1,834,
58.5491,33.1539,36.8987,um,Surface,Position,1,835,

## Sheet: Pos_0007_start
Detailed
====================
Position X,Position Y,Position Z,Unit,Category,Collection,Time,ID,
109.59,65.1826,68.2337,um,Surface,Position,1,438,
92.7227,87.2381,47.966,um,Surface,Position,1,439,
95.2287,83.5612,70.0222,um,Surface,Position,1,440,
105.735,74.1012,63.1151,um,Surface,Position,1,441,
93.5229,87.9572,56.9225,um,Surface,Position,1,442,
90.6073,87.3551,67.0528,um,Surface,Position,1,443,
100.353,81.4542,62.8981,um,Surface,Position,1,444,
108.452,74.2414,55.7458,um,Surface,Position,1,445,
86.6005,76.9587,79.3659,um,Surface,Position,1,446,
96.9543,67.5012,78.3717,um,Surface,Position,1,447,
104.496,74.6651,44.4888,um,Surface,Position,1,448,
103.712,64.4747,73.6841,um,Surface,Position,1,449,
94.4303,77.0244,72.5231,um,Surface,Position,1,450,
113.522,63.6103,58.4444,um,Surface,Position,1,451,
98.2548,84.4018,42.0422,um,Surface,Position,1,452,
102.211,53.6944,81.4023,um,Surface,Position,1,453,
109.868,56.0313,66.703,um,Surface,Position,1,454,
110.998,59.8555,39.3933,um,Surface,Position,1,455,
105.7,67.0145,34.9796,um,Surface,Position,1,456,
105.897,69.3903,39.1421,um,Surface,Position,1,457,
80.6025,86.3406,65.2693,um,Surface,Position,1,458,
83.3873,88.513,46.0484,um,Surface,Position,1,459,
106.175,50.2651,70.6159,um,Surface,Position,1,460,
76.4545,78.6436,75.8535,um,Surface,Position,1,461,
74.5505,88.9052,57.7146,um,Surface,Position,1,462,
96.0397,76.7139,30.6569,um,Surface,Position,1,463,
90.2206,80.7195,35.1917,um,Surface,Position,1,464,
96.3142,58.2113,81.2886,um,Surface,Position,1,465,
112.438,58.415,47.0477,um,Surface,Position,1,466,
110.307,41.0214,64.2072,um,Surface,Position,1,467,
94.8134,70.5329,23.4172,um,Surface,Position,1,468,
109.14,48.3018,46.2806,um,Surface,Position,1,469,
100.703,53.5182,75.4112,um,Surface,Position,1,470,
74.1329,88.6109,42.0666,um,Surface,Position,1,471,
110.233,49.8564,52.3767,um,Surface,Position,1,472,
104.122,49.2206,26.3004,um,Surface,Position,1,473,
65.9044,81.6853,68.6599,um,Surface,Position,1,474,
103.467,60.3069,33.0235,um,Surface,Position,1,475,
77.1717,82.5122,31.0561,um,Surface,Position,1,476,
65.8357,86.3461,55.4624,um,Surface,Position,1,477,
78.8041,69.9613,83.1142,um,Surface,Position,1,478,
86.02,58.836,84.4895,um,Surface,Position,1,479,
99.3015,54.1065,29.4665,um,Surface,Position,1,480,
95.2092,48.6403,80.1493,um,Surface,Position,1,481,
86.1244,73.0169,22.7634,um,Surface,Position,1,482,
103.718,42.9103,30.0452,um,Surface,Position,1,483,
98.2575,39.6191,73.4233,um,Surface,Position,1,484,
72.1211,63.8812,83.8995,um,Surface,Position,1,485,
104.785,41.0576,57.9106,um,Surface,Position,1,486,
64.0979,82.7984,36.4751,um,Surface,Position,1,487,
85.735,62.463,18.3416,um,Surface,Position,1,488,
100.128,39.1822,33.6824,um,Surface,Position,1,489,
71.9071,65.7865,27.274,um,Surface,Position,1,490,
77.9307,68.0077,19.7044,um,Surface,Position,1,491,
95.3717,60.6202,21.651,um,Surface,Position,1,492,
95.5258,43.3123,10.2984,um,Surface,Position,1,493,
97.8344,33.0036,64.1938,um,Surface,Position,1,494,
54.8339,78.5172,59.1121,um,Surface,Position,1,495,
55.7798,70.5942,78.4324,um,Surface,Position,1,496,
69.0202,74.9246,23.0784,um,Surface,Position,1,497,
60.4332,73.7909,70.4236,um,Surface,Position,1,498,
102.131,32.508,48.4989,um,Surface,Position,1,499,
55.2728,71.9322,68.0732,um,Surface,Position,1,500,
100.148,33.6335,39.075,um,Surface,Position,1,501,
82.4024,44.9138,82.6205,um,Surface,Position,1,502,
50.0063,73.291,55.1848,um,Surface,Position,1,503,
71.6577,49.7499,82.8039,um,Surface,Position,1,504,
91.8532,47.8355,20.6205,um,Surface,Position,1,505,
87.4337,46.4703,9.59286,um,Surface,Position,1,506,
62.3629,68.2317,33.4314,um,Surface,Position,1,507,
65.4471,63.2147,40.4675,um,Surface,Position,1,508,
56.454,79.6795,44.8214,um,Surface,Position,1,509,
80.6476,54.4349,18.2568,um,Surface,Position,1,510,
91.5416,40.1605,24.6472,um,Surface,Position,1,511,
58.3841,74.2467,28.7299,um,Surface,Position,1,512,
98.2768,29.1396,39.0448,um,Surface,Position,1,513,
85.1241,36.4073,77.6471,um,Surface,Position,1,514,
96.897,35.6215,31.503,um,Surface,Position,1,515,
72.7672,36.0671,77.4884,um,Surface,Position,1,516,
62.8508,59.7699,35.8428,um,Surface,Position,1,517,
93.7476,25.3309,55.4549,um,Surface,Position,1,518,
53.2169,62.2445,64.9483,um,Surface,Position,1,519,
55.5427,62.9931,74.1104,um,Surface,Position,1,520,
70.7355,61.9779,16.8007,um,Surface,Position,1,521,
62.4269,57.0466,81.2801,um,Surface,Position,1,522,
65.7622,35.8877,71.9051,um,Surface,Position,1,523,
50.7746,65.1442,37.5416,um,Surface,Position,1,524,
89.7583,28.1361,37.0404,um,Surface,Position,1,525,
62.5939,45.3617,80.9736,um,Surface,Position,1,526,
58.5936,61.2562,22.607,um,Surface,Position,1,527,
84.5493,29.5319,65.4734,um,Surface,Position,1,528,
46.7628,67.1219,51.6717,um,Surface,Position,1,529,
59.9654,52.7284,24.223,um,Surface,Position,1,530,
81.978,22.4927,49.1056,um,Surface,Position,1,531,
82.8723,28.4945,30.3455,um,Surface,Position,1,532,
48.824,56.3511,59.5618,um,Surface,Position,1,533,
76.6493,41.2801,18.6985,um,Surface,Position,1,534,
59.0904,47.8654,74.7065,um,Surface,Position,1,535,
55.5094,38.4795,66.5223,um,Surface,Position,1,536,
41.9685,48.6304,64.852,um,Surface,Position,1,537,
71.9797,34.8163,25.1767,um,Surface,Position,1,538,
45.0525,47.1459,67.7901,um,Surface,Position,1,539,
67.4856,45.6309,19.8981,um,Surface,Position,1,540,
48.3765,56.5655,34.6246,um,Surface,Position,1,541,
43.7863,59.3854,48.2318,um,Surface,Position,1,542,
48.7695,47.5667,66.0363,um,Surface,Position,1,543,
46.0981,52.1185,37.5149,um,Surface,Position,1,544,
43.9287,49.3188,49.7748,um,Surface,Position,1,545,
52.8987,46.484,31.1528,um,Surface,Position,1,546,
66.2006,33.468,30.1055,um,Surface,Position,1,547,
61.0361,39.3412,26.6394,um,Surface,Position,1,548,
74.8778,23.8629,55.9398,um,Surface,Position,1,549,
56.1809,31.6553,39.6233,um,Surface,Position,1,550,
51.3646,36.0447,46.1393,um,Surface,Position,1,551,
51.1558,36.1238,56.9084,um,Surface,Position,1,552,
48.2781,43.2194,41.7516,um,Surface,Position,1,553,
67.7461,24.0849,41.2399,um,Surface,Position,1,554,
70.174,26.9966,33.2774,um,Surface,Position,1,555,
66.0041,26.1439,60.9106,um,Surface,Position,1,556,

## Sheet: Pos_0008_start
Detailed
====================
Position X,Position Y,Position Z,Unit,Category,Collection,Time,ID,
100.691,71.9321,90.0588,um,Surface,Position,1,305,
107.29,67.6699,92.2127,um,Surface,Position,1,306,
109.813,70.2977,80.4519,um,Surface,Position,1,307,
102.561,78.6829,76.4943,um,Surface,Position,1,308,
101.473,76.3422,90.844,um,Surface,Position,1,309,
95.0843,76.2206,88.6978,um,Surface,Position,1,310,
113.642,57.1886,91.232,um,Surface,Position,1,311,
117.884,57.3698,73.6553,um,Surface,Position,1,312,
113.259,63.5123,75.9631,um,Surface,Position,1,313,
95.4422,81.725,75.0963,um,Surface,Position,1,314,
97.1182,66.014,96.6309,um,Surface,Position,1,315,
94.7867,78.3892,64.3688,um,Surface,Position,1,316,
114.62,58.7335,64.556,um,Surface,Position,1,317,
108.256,68.9748,63.196,um,Surface,Position,1,318,
119.357,50.8804,85.0039,um,Surface,Position,1,319,
88.2699,80.1856,87.6634,um,Surface,Position,1,320,
104.554,62.397,54.7773,um,Surface,Position,1,321,
83.886,74.2576,94.6333,um,Surface,Position,1,322,
117.989,41.6541,86.0834,um,Surface,Position,1,323,
111.87,48.7947,94.3009,um,Surface,Position,1,324,
99.8768,71.8128,55.3718,um,Surface,Position,1,325,
119.939,47.027,65.7095,um,Surface,Position,1,326,
85.9941,81.0502,79.501,um,Surface,Position,1,327,
114.015,38.2626,92.3572,um,Surface,Position,1,328,
82.2676,80.2447,63.4473,um,Surface,Position,1,329,
89.6235,62.5908,102.217,um,Surface,Position,1,330,
80.7552,74.0609,85.4096,um,Surface,Position,1,331,
95.7182,58.398,103.726,um,Surface,Position,1,332,
89.4367,76.14,56.0057,um,Surface,Position,1,333,
109.278,55.8022,53.7567,um,Surface,Position,1,334,
100.119,46.6568,104.045,um,Surface,Position,1,335,
115.768,39.7728,57.1223,um,Surface,Position,1,336,
75.6803,81.5926,74.6438,um,Surface,Position,1,337,
83.0921,67.5251,98.1541,um,Surface,Position,1,338,
117.812,37.1615,71.4491,um,Surface,Position,1,339,
112.691,47.0491,53.7892,um,Surface,Position,1,340,
75.1702,78.2679,82.9036,um,Surface,Position,1,341,
117.209,32.7797,64.8795,um,Surface,Position,1,342,
82.2977,60.0317,104.287,um,Surface,Position,1,343,
73.8591,71.276,93.8558,um,Surface,Position,1,344,
91.3524,51.1884,103.63,um,Surface,Position,1,345,
90.1249,69.2835,49.1351,um,Surface,Position,1,346,
105.203,39.1493,100.078,um,Surface,Position,1,347,
92.5595,58.5465,44.9015,um,Surface,Position,1,348,
75.6181,63.5605,100.647,um,Surface,Position,1,349,
77.5393,72.3651,52.1551,um,Surface,Position,1,350,
107.505,32.4666,99.6015,um,Surface,Position,1,351,
73.0891,69.9276,86.5392,um,Surface,Position,1,352,
102.285,51.6899,47.2107,um,Surface,Position,1,353,
112.901,30.301,85.4768,um,Surface,Position,1,354,
111.142,32.4731,54.1791,um,Surface,Position,1,355,
89.2264,39.2621,106.218,um,Surface,Position,1,356,
105.507,39.9876,46.143,um,Surface,Position,1,357,
106.185,26.9627,93.6724,um,Surface,Position,1,358,
83.5097,65.0615,45.9177,um,Surface,Position,1,359,
70.5972,76.6382,62.9797,um,Surface,Position,1,360,
67.628,73.4396,73.7334,um,Surface,Position,1,361,
66.7841,65.3235,89.5891,um,Surface,Position,1,362,
70.87,56.0631,99.0269,um,Surface,Position,1,363,
111.649,23.2977,66.6697,um,Surface,Position,1,364,
93.5359,48.1095,42.9315,um,Surface,Position,1,365,
109.759,23.0931,77.7244,um,Surface,Position,1,366,
96.4298,36.1936,105.761,um,Surface,Position,1,367,
105.13,31.4379,45.1063,um,Surface,Position,1,368,
109.249,23.6035,56.55,um,Surface,Position,1,369,
82.1226,54.9179,40.2261,um,Surface,Position,1,370,
105.448,18.9087,84.2318,um,Surface,Position,1,371,
77.0948,47.7974,102.62,um,Surface,Position,1,372,
72.4583,65.382,49.1133,um,Surface,Position,1,373,
65.7459,62.9767,54.1368,um,Surface,Position,1,374,
74.6969,55.3804,43.6099,um,Surface,Position,1,375,
99.8867,19.1549,91.7695,um,Surface,Position,1,376,
59.5564,66.9498,67.3871,um,Surface,Position,1,377,
62.9159,57.5371,91.3093,um,Surface,Position,1,378,
58.736,67.5693,78.14,um,Surface,Position,1,379,
64.0875,68.6485,58.0906,um,Surface,Position,1,380,
92.6581,23.3991,100.475,um,Surface,Position,1,381,
96.3454,29.9704,43.3233,um,Surface,Position,1,382,
105.608,16.9503,59.2466,um,Surface,Position,1,383,
101.374,26.1882,47.575,um,Surface,Position,1,384,
88.5957,39.8631,38.9713,um,Surface,Position,1,385,
77.6331,35.6837,104.825,um,Surface,Position,1,386,
92.3655,15.0733,89.5502,um,Surface,Position,1,387,
96.7902,13.2682,78.735,um,Surface,Position,1,388,
100.636,19.1013,50.5169,um,Surface,Position,1,389,
69.0484,38.7385,102.165,um,Surface,Position,1,390,
80.8003,25.4736,103.239,um,Surface,Position,1,391,
101.172,14.0767,68.5547,um,Surface,Position,1,392,
64.0031,56.1046,49.7408,um,Surface,Position,1,393,
57.5408,47.4806,91.5896,um,Surface,Position,1,394,
88.5152,27.8839,41.9045,um,Surface,Position,1,395,
57.197,55.2883,79.0139,um,Surface,Position,1,396,
83.3616,17.052,95.2419,um,Surface,Position,1,397,
81.7134,36.2615,43.3618,um,Surface,Position,1,398,
70.6237,25.0184,99.1447,um,Surface,Position,1,399,
71.8458,37.6278,45.35,um,Surface,Position,1,400,
64.8882,44.6036,48.4034,um,Surface,Position,1,401,
56.8462,53.06,55.6469,um,Surface,Position,1,402,
54.2122,56.3293,66.4131,um,Surface,Position,1,403,
61.9317,40.6006,95.268,um,Surface,Position,1,404,
96.6547,15.3145,57.5048,um,Surface,Position,1,405,
89.3487,12.8155,58.5208,um,Surface,Position,1,406,
73.7565,16.517,89.6356,um,Surface,Position,1,407,
64.5315,31.0829,95.1825,um,Surface,Position,1,408,
88.4153,19.4418,47.896,um,Surface,Position,1,409,
55.3358,47.051,72.0668,um,Surface,Position,1,410,
87.2144,12.3442,77.1663,um,Surface,Position,1,411,
73.7757,15.0577,77.4546,um,Surface,Position,1,412,
80.5885,12.5982,69.6952,um,Surface,Position,1,413,
56.097,43.3213,57.898,um,Surface,Position,1,414,
82.3638,17.9099,52.5375,um,Surface,Position,1,415,
65.9036,23.2511,89.2061,um,Surface,Position,1,416,
78.3681,28.0588,48.3339,um,Surface,Position,1,417,
54.6738,43.6978,84.364,um,Surface,Position,1,418,
65.203,23.7403,58.0178,um,Surface,Position,1,419,
69.2738,18.4178,66.4549,um,Surface,Position,1,420,
59.477,29.7717,67.676,um,Surface,Position,1,421,
62.087,33.9559,51.0467,um,Surface,Position,1,422,
56.5127,35.4184,76.822,um,Surface,Position,1,423,
70.6524,22.5809,51.5811,um,Surface,Position,1,424,
80.426,13.4268,57.2513,um,Surface,Position,1,425,

## Sheet: Pos_0009_start
Detailed
====================
Position X,Position Y,Position Z,Unit,Category,Collection,Time,ID,
98.4732,62.0728,51.3262,um,Surface,Position,1,294,
87.3833,71.863,58.4923,um,Surface,Position,1,295,
91.1326,63.8072,66.3956,um,Surface,Position,1,296,
98.7071,66.4962,47.3594,um,Surface,Position,1,297,
87.9961,76.6587,53.3086,um,Surface,Position,1,298,
93.1086,72.8974,47.7094,um,Surface,Position,1,299,
84.8776,66.485,65.637,um,Surface,Position,1,300,
72.1289,83.9636,57.7515,um,Surface,Position,1,301,
103.824,57.1956,38.9159,um,Surface,Position,1,302,
78.1345,78.084,61.7226,um,Surface,Position,1,303,
102.819,57.346,46.2706,um,Surface,Position,1,304,
82.0515,80.3053,57.1917,um,Surface,Position,1,305,
97.369,58.5011,60.5805,um,Surface,Position,1,306,
70.7804,78.2022,64.9997,um,Surface,Position,1,307,
73.9519,86.3499,24.0013,um,Surface,Position,1,308,
100.973,57.6493,31.6613,um,Surface,Position,1,309,
78.9605,79.7745,36.0548,um,Surface,Position,1,310,
71.7599,82.8507,50.4103,um,Surface,Position,1,311,
77.8436,73.9961,67.608,um,Surface,Position,1,312,
93.8778,68.9499,38.3311,um,Surface,Position,1,313,
96.6499,47.3787,62.54,um,Surface,Position,1,314,
103.832,46.5364,37.6511,um,Surface,Position,1,315,
88.9485,53.9564,72.2093,um,Surface,Position,1,316,
71.2421,72.6888,71.2795,um,Surface,Position,1,317,
60.4662,89.5156,47.1845,um,Surface,Position,1,318,
72.7807,80.928,36.7096,um,Surface,Position,1,319,
102.039,49.3048,50.0822,um,Surface,Position,1,320,
71.7163,57.9809,73.3392,um,Surface,Position,1,321,
92.9862,39.6289,67.42,um,Surface,Position,1,322,
65.023,67.7922,73.2946,um,Surface,Position,1,323,
61.6227,75.3061,67.0658,um,Surface,Position,1,324,
103.38,40.285,47.6798,um,Surface,Position,1,325,
62.9932,88.6732,24.7735,um,Surface,Position,1,326,
74.7559,64.1625,75.7642,um,Surface,Position,1,327,
69.278,74.9279,13.558,um,Surface,Position,1,328,
87.7937,57.1632,19.4332,um,Surface,Position,1,329,
102.075,36.254,37.1308,um,Surface,Position,1,330,
56.5149,83.1605,46.1519,um,Surface,Position,1,331,
88.0039,44.1515,72.132,um,Surface,Position,1,332,
98.1818,44.8665,28.0881,um,Surface,Position,1,333,
78.2636,70.5176,14.7802,um,Surface,Position,1,334,
80.4465,49.2415,75.6178,um,Surface,Position,1,335,
82.4327,57.1004,14.2022,um,Surface,Position,1,336,
91.5317,45.5643,22.485,um,Surface,Position,1,337,
44.9549,87.0346,43.8442,um,Surface,Position,1,338,
95.4342,31.7731,55.4801,um,Surface,Position,1,339,
100.716,33.3991,43.4192,um,Surface,Position,1,340,
100.159,34.5058,52.6709,um,Surface,Position,1,341,
96.6031,33.8,28.3203,um,Surface,Position,1,342,
73.3176,62.3601,10.902,um,Surface,Position,1,343,
63.1578,52.9909,75.0359,um,Surface,Position,1,344,
69.4414,46.5345,78.8237,um,Surface,Position,1,345,
53.8751,65.4926,71.1234,um,Surface,Position,1,346,
75.8801,43.9297,73.7856,um,Surface,Position,1,347,
83.906,37.1089,72.4573,um,Surface,Position,1,348,
48.145,68.4796,58.575,um,Surface,Position,1,349,
95.389,27.5867,34.1226,um,Surface,Position,1,350,
86.0048,31.3749,68.8115,um,Surface,Position,1,351,
47.6859,73.8963,52.2947,um,Surface,Position,1,352,
58.8531,55.1889,88.4562,um,Surface,Position,1,353,
45.3697,79.861,33.1608,um,Surface,Position,1,354,
78.1387,30.5872,67.809,um,Surface,Position,1,355,
88.0046,29.1696,29.9493,um,Surface,Position,1,356,
69.211,56.1965,8.42324,um,Surface,Position,1,357,
92.2049,23.7793,45.09,um,Surface,Position,1,358,
66.1455,61.8521,8.98527,um,Surface,Position,1,359,
52.8421,76.9762,18.969,um,Surface,Position,1,360,
79.0384,49.6037,11.5805,um,Surface,Position,1,361,
60.4073,42.9293,73.4944,um,Surface,Position,1,362,
71.0874,32.243,70.5162,um,Surface,Position,1,363,
49.1609,56.8246,68.9814,um,Surface,Position,1,364,
88.613,29.5294,22.0712,um,Surface,Position,1,365,
40.872,70.8554,39.7178,um,Surface,Position,1,366,
87.4214,26.3408,60.358,um,Surface,Position,1,367,
41.2145,69.312,56.3071,um,Surface,Position,1,368,
42.6704,61.1052,54.4865,um,Surface,Position,1,369,
37.9135,73.1789,32.2039,um,Surface,Position,1,370,
86.225,21.5183,52.121,um,Surface,Position,1,371,
65.4118,35.4622,73.1666,um,Surface,Position,1,372,
53.2439,47.4524,73.4194,um,Surface,Position,1,373,
90.7294,22.984,37.2572,um,Surface,Position,1,374,
79.3954,40.3268,12.7189,um,Surface,Position,1,375,
59.0059,34.5821,68.7772,um,Surface,Position,1,376,
83.3467,25.9566,23.9292,um,Surface,Position,1,377,
66.3905,47.3845,9.78136,um,Surface,Position,1,378,
40.7805,66.3129,28.1203,um,Surface,Position,1,379,
58.5097,54.5797,9.24109,um,Surface,Position,1,380,
37.0195,66.9628,50.4964,um,Surface,Position,1,381,
82.503,32.0014,15.5762,um,Surface,Position,1,382,
83.6074,19.9312,44.2217,um,Surface,Position,1,383,
44.4987,47.3005,70.2753,um,Surface,Position,1,384,
63.9568,29.2546,66.4187,um,Surface,Position,1,385,
83.4631,18.724,34.3169,um,Surface,Position,1,386,
54.3807,38.6658,70.5316,um,Surface,Position,1,387,
75.7335,34.0708,12.2308,um,Surface,Position,1,388,
73.3688,25.5843,64.4822,um,Surface,Position,1,389,
51.5857,33.8353,65.5443,um,Surface,Position,1,390,
57.5771,45.4017,12.1108,um,Surface,Position,1,391,
77.3281,19.4256,29.7645,um,Surface,Position,1,392,
65.3109,37.5417,8.91134,um,Surface,Position,1,393,
76.967,15.2071,50.0186,um,Surface,Position,1,394,
41.0184,58.0577,33.4096,um,Surface,Position,1,395,
52.8062,50.3225,14.4321,um,Surface,Position,1,396,
47.3946,47.1061,19.6719,um,Surface,Position,1,397,
41.3808,55.1434,21.571,um,Surface,Position,1,398,
76.2675,18.5443,40.6739,um,Surface,Position,1,399,
71.7555,25.2401,18.6705,um,Surface,Position,1,400,
59.3018,25.6436,60.2278,um,Surface,Position,1,401,
45.2815,41.334,61.4238,um,Surface,Position,1,402,
72.4978,20.961,47.2829,um,Surface,Position,1,403,
50.8989,40.4895,18.2461,um,Surface,Position,1,404,
64.9357,20.6519,36.0884,um,Surface,Position,1,405,
43.1366,40.1573,53.2182,um,Surface,Position,1,406,
57.3181,35.7633,13.828,um,Surface,Position,1,407,
46.5355,34.8274,59.4056,um,Surface,Position,1,408,
62.4761,30.7464,15.4294,um,Surface,Position,1,409,
66.0954,17.9383,48.3282,um,Surface,Position,1,410,
60.133,22.0327,29.6556,um,Surface,Position,1,411,
41.9177,43.8575,22.7676,um,Surface,Position,1,412,
44.7175,39.5414,26.7818,um,Surface,Position,1,413,
68.2833,20.3199,28.8017,um,Surface,Position,1,414,
31.6714,46.9557,45.5141,um,Surface,Position,1,415,
39.4228,47.4218,36.7766,um,Surface,Position,1,416,
51.8228,29.2862,54.2132,um,Surface,Position,1,417,
43.3561,34.181,43.0983,um,Surface,Position,1,418,
60.284,16.2188,41.3426,um,Surface,Position,1,419,
61.7624,17.9683,34.6103,um,Surface,Position,1,420,
53.119,31.5524,18.8245,um,Surface,Position,1,421,
38.4879,35.2872,54.5218,um,Surface,Position,1,422,
54.038,24.0327,45.3459,um,Surface,Position,1,423,
57.6127,26.0156,21.8948,um,Surface,Position,1,424,
47.342,31.0593,26.852,um,Surface,Position,1,425,
52.9013,24.4801,28.7784,um,Surface,Position,1,426,
46.2678,27.3619,42.2723,um,Surface,Position,1,427,
50.1481,24.1747,37.814,um,Surface,Position,1,428,
44.8533,29.5883,52.2033,um,Surface,Position,1,429,
37.2547,39.1958,36.393,um,Surface,Position,1,430,

[truncated: 10 more sheets: Pos_0010_start, Pos_0011_start, Pos_0012_start, Pos_0013_start, Pos_0014_start, Pos_0015_start, Pos_0016_start, Pos_0017_start, Pos_0018_start, Pos_0019_start]
