# Supplementary material for: Tracking cells in epithelial acini by light sheet microscopy reveals proximity effects in breast cancer initiation
Source: eLife. 2020 Jul 21;9:e54066. doi: 10.7554/eLife.54066 (PMC7373425; doi:10.7554/eLife.54066)
Supplement: Supplementary file 3. — This file was input into the source code to carry out the acinus feature analysis described in Figure 4b and Figure 4—figure supplement 1. [file elife-54066-supp3.xlsx]

## Sheet: Pos_0000_end
Detailed
====================
Position X,Position Y,Position Z,Unit,Category,Collection,Time,ID,
104.782,65.0284,53.668,um,Surface,Position,447,3492,
85.7739,68.3643,85.6994,um,Surface,Position,447,3493,
100.294,74.7769,49.434,um,Surface,Position,447,3494,
82.1749,81.6653,76.2666,um,Surface,Position,447,3495,
94.643,80.092,33.0553,um,Surface,Position,447,3496,
92.4426,71.6752,77.682,um,Surface,Position,447,3497,
91.9895,87.3597,37.6242,um,Surface,Position,447,3498,
86.0462,89.6356,42.2625,um,Surface,Position,447,3499,
102.543,69.1336,61.5775,um,Surface,Position,447,3500,
101.468,66.9329,68.9679,um,Surface,Position,447,3501,
91.7352,84.3554,57.7043,um,Surface,Position,447,3502,
88.6747,82.1005,71.4138,um,Surface,Position,447,3503,
95.9419,81.6629,51.4702,um,Surface,Position,447,3504,
95.1065,82.1761,40.3592,um,Surface,Position,447,3505,
94.8623,80.0402,65.8891,um,Surface,Position,447,3506,
99.2843,66.3916,28.708,um,Surface,Position,447,3507,
103.035,60.6305,38.6756,um,Surface,Position,447,3508,
75.4885,89.4154,65.0701,um,Surface,Position,447,3509,
88.6364,80.7207,26.3808,um,Surface,Position,447,3510,
91.5234,59.5569,85.5278,um,Surface,Position,447,3511,
96.6684,72.6259,31.3358,um,Surface,Position,447,3512,
101.506,53.9881,73.1063,um,Surface,Position,447,3513,
105.159,58.3329,53.6295,um,Surface,Position,447,3514,
105.147,55.5333,62.6656,um,Surface,Position,447,3515,
81.5052,90.6472,43.8992,um,Surface,Position,447,3516,
101.681,70.3443,37.1148,um,Surface,Position,447,3517,
98.368,61.0392,76.9031,um,Surface,Position,447,3518,
70.0586,91.0826,42.6801,um,Surface,Position,447,3519,
106.409,50.9468,54.1869,um,Surface,Position,447,3520,
74.0834,81.8043,81.1395,um,Surface,Position,447,3521,
71.3383,91.1936,52.614,um,Surface,Position,447,3522,
100.357,63.2535,31.5591,um,Surface,Position,447,3523,
82.4536,86.3171,31.3384,um,Surface,Position,447,3524,
75.8782,89.1003,39.6218,um,Surface,Position,447,3525,
98.085,48.0731,79.0294,um,Surface,Position,447,3526,
101.361,45.4431,74.4292,um,Surface,Position,447,3527,
64.3124,91.3793,59.3682,um,Surface,Position,447,3528,
77.811,59.9319,94.9935,um,Surface,Position,447,3529,
103.769,46.4268,67.2818,um,Surface,Position,447,3530,
73.2555,69.5948,92.0777,um,Surface,Position,447,3531,
95.0847,51.5117,84.509,um,Surface,Position,447,3532,
91.0845,72.857,24.3374,um,Surface,Position,447,3533,
105.878,52.7658,45.3695,um,Surface,Position,447,3534,
63.6997,80.1068,83.5923,um,Surface,Position,447,3535,
84.609,70.8413,18.4329,um,Surface,Position,447,3536,
61.176,82.9205,75.2652,um,Surface,Position,447,3537,
73.2453,83.9456,27.8468,um,Surface,Position,447,3538,
94.6657,59.1994,23.8354,um,Surface,Position,447,3539,
63.6352,75.1867,90.5999,um,Surface,Position,447,3540,
82.0325,79.7477,21.8633,um,Surface,Position,447,3541,
57.4866,88.4345,68.143,um,Surface,Position,447,3542,
65.9664,83.674,56.0833,um,Surface,Position,447,3543,
102.591,52.3339,36.4218,um,Surface,Position,447,3544,
95.0097,65.0196,25.1123,um,Surface,Position,447,3545,
68.911,87.0798,35.2142,um,Surface,Position,447,3546,
65.6577,78.3455,48.7212,um,Surface,Position,447,3547,
68.8257,76.9702,37.8265,um,Surface,Position,447,3548,
98.4284,49.9469,29.7529,um,Surface,Position,447,3549,
102.123,37.9087,58.3829,um,Surface,Position,447,3550,
77.0177,74.6357,17.5895,um,Surface,Position,447,3551,
72.485,80.7078,32.3085,um,Surface,Position,447,3552,
88.9285,64.2205,18.3551,um,Surface,Position,447,3553,
91.3651,41.9908,86.2534,um,Surface,Position,447,3554,
103.413,42.669,43.107,um,Surface,Position,447,3555,
59.6293,87.661,48.1302,um,Surface,Position,447,3556,
98.2248,58.2002,29.8577,um,Surface,Position,447,3557,
53.3901,84.6969,40.8702,um,Surface,Position,447,3558,
98.745,41.5853,30.4325,um,Surface,Position,447,3559,
44.4686,91.8701,51.9743,um,Surface,Position,447,3560,
53.1098,79.8587,81.4713,um,Surface,Position,447,3561,
97.6476,36.0416,69.1769,um,Surface,Position,447,3562,
60.3943,82.1216,63.1585,um,Surface,Position,447,3563,
69.7415,58.2536,97.261,um,Surface,Position,447,3564,
51.9957,76.2985,88.2768,um,Surface,Position,447,3565,
49.5376,84.2843,50.7203,um,Surface,Position,447,3566,
48.1613,80.5509,66.9809,um,Surface,Position,447,3567,
75.7873,66.2123,12.6076,um,Surface,Position,447,3568,
62.7316,80.0757,36.6526,um,Surface,Position,447,3569,
90.2843,31.5263,81.7595,um,Surface,Position,447,3570,
54.8903,77.9482,56.6631,um,Surface,Position,447,3571,
100.036,34.7582,42.648,um,Surface,Position,447,3572,
76.131,44.108,95.4461,um,Surface,Position,447,3573,
87.4532,56.4617,17.28,um,Surface,Position,447,3574,
59.4765,65.852,93.6088,um,Surface,Position,447,3575,
70.4405,78.1449,21.3983,um,Surface,Position,447,3576,
45.6838,82.1263,75.2982,um,Surface,Position,447,3577,
48.2484,61.0158,94.6155,um,Surface,Position,447,3578,
52.3629,77.9539,37.8347,um,Surface,Position,447,3579,
38.5878,77.78,77.7108,um,Surface,Position,447,3580,
43.2035,74.6916,83.4991,um,Surface,Position,447,3581,
56.9664,80.2455,23.5487,um,Surface,Position,447,3582,
57.1776,69.9633,50.9784,um,Surface,Position,447,3583,
57.8905,51.6706,98.0952,um,Surface,Position,447,3584,
65.6329,72.0297,15.6779,um,Surface,Position,447,3585,
61.1838,76.054,25.8562,um,Surface,Position,447,3586,
92.8535,44.0183,22.254,um,Surface,Position,447,3587,
79.1112,59.9552,12.2916,um,Surface,Position,447,3588,
39.072,91.6955,42.3093,um,Surface,Position,447,3589,
97.0944,28.1073,58.8701,um,Surface,Position,447,3590,
93.8686,26.9474,48.6412,um,Surface,Position,447,3591,
78.1271,51.4241,13.4518,um,Surface,Position,447,3592,
49.6033,71.4564,51.9306,um,Surface,Position,447,3593,
93.0692,34.9122,25.787,um,Surface,Position,447,3594,
76.3153,30.4715,91.0946,um,Surface,Position,447,3595,
87.8233,40.0317,21.48,um,Surface,Position,447,3596,
42.1043,65.047,88.777,um,Surface,Position,447,3597,
69.3289,34.6488,95.5557,um,Surface,Position,447,3598,
66.7437,48.1795,98.4373,um,Surface,Position,447,3599,
96.5582,28.1439,37.256,um,Surface,Position,447,3600,
68.5704,66.4447,12.6743,um,Surface,Position,447,3601,
85.9185,48.2213,14.0235,um,Surface,Position,447,3602,
60.7037,72.0733,30.4699,um,Surface,Position,447,3603,
44.5088,56.0405,94.2498,um,Surface,Position,447,3604,
68.3725,59.4573,10.2607,um,Surface,Position,447,3605,
35.8575,76.9542,67.8331,um,Surface,Position,447,3606,
93.1698,20.4961,54.8193,um,Surface,Position,447,3607,
92.9887,29.609,30.6842,um,Surface,Position,447,3608,
44.7388,75.4673,54.5191,um,Surface,Position,447,3609,
43.5466,76.8614,34.5511,um,Surface,Position,447,3610,
56.1423,72.5195,19.6958,um,Surface,Position,447,3611,
80.0295,23.4989,85.0565,um,Surface,Position,447,3612,
91.9711,23.0887,67.3025,um,Surface,Position,447,3613,
34.7877,80.2813,57.9435,um,Surface,Position,447,3614,
77.9851,43.7063,13.6419,um,Surface,Position,447,3615,
70.9849,26.6595,88.4035,um,Surface,Position,447,3616,
34.7544,67.2654,81.9464,um,Surface,Position,447,3617,
55.9304,67.8929,19.3935,um,Surface,Position,447,3618,
38.3526,77.5135,45.7433,um,Surface,Position,447,3619,
38.198,74.8613,56.3207,um,Surface,Position,447,3620,
52.8026,70.4255,35.9062,um,Surface,Position,447,3621,
33.2861,74.3092,39.4973,um,Surface,Position,447,3622,
39.8223,51.8254,91.5172,um,Surface,Position,447,3623,
68.7837,47.0659,11.7528,um,Surface,Position,447,3624,
60.9135,56.8795,11.7521,um,Surface,Position,447,3625,
56.8531,34.3973,94.6642,um,Surface,Position,447,3626,
45.0896,70.5189,23.9872,um,Surface,Position,447,3627,
82.6058,15.5931,70.6918,um,Surface,Position,447,3628,
36.504,58.8864,86.4176,um,Surface,Position,447,3629,
52.5377,43.8551,96.1998,um,Surface,Position,447,3630,
32.6564,71.1723,73.729,um,Surface,Position,447,3631,
72.474,26.2485,36.5473,um,Surface,Position,447,3632,
29.5916,56.9988,80.4332,um,Surface,Position,447,3633,
27.3205,63.1073,71.8372,um,Surface,Position,447,3634,
44.4422,41.1778,92.5459,um,Surface,Position,447,3635,
51.0162,60.863,16.3906,um,Surface,Position,447,3636,
39.8179,69.4707,41.17,um,Surface,Position,447,3637,
76.3831,36.9901,16.199,um,Surface,Position,447,3638,
37.5915,70.364,26.1278,um,Surface,Position,447,3639,
71.6963,18.1125,81.7705,um,Surface,Position,447,3640,
28.3743,69.0623,65.6005,um,Surface,Position,447,3641,
84.0465,31.9396,20.988,um,Surface,Position,447,3642,
90.3153,21.1037,43.7014,um,Surface,Position,447,3643,
85.7604,26.544,31.27,um,Surface,Position,447,3644,
47.6655,51.586,16.5709,um,Surface,Position,447,3645,
75.1085,27.1397,25.1565,um,Surface,Position,447,3646,
75.8922,11.5792,64.1888,um,Surface,Position,447,3647,
32.5172,47.7576,82.7022,um,Surface,Position,447,3648,
83.9664,14.3317,53.2063,um,Surface,Position,447,3649,
27.914,68.1669,52.9201,um,Surface,Position,447,3650,
65.5017,39.6573,13.919,um,Surface,Position,447,3651,
35.7314,64.2135,30.5151,um,Surface,Position,447,3652,
79.9949,20.125,40.8809,um,Surface,Position,447,3653,
58.4687,48.2284,12.9833,um,Surface,Position,447,3654,
30.0714,58.9598,31.8148,um,Surface,Position,447,3655,
23.2075,54.907,66.28,um,Surface,Position,447,3656,
33.7322,42.6023,83.3478,um,Surface,Position,447,3657,
27.7645,46.2664,74.5462,um,Surface,Position,447,3658,
72.9851,12.3407,52.4261,um,Surface,Position,447,3659,
52.7369,45.3711,14.1493,um,Surface,Position,447,3660,
23.3462,62.1754,51.9818,um,Surface,Position,447,3661,
67.6583,32.1145,18.5175,um,Surface,Position,447,3662,
48.2732,29.1067,88.5437,um,Surface,Position,447,3663,
25.2009,63.6264,44.8017,um,Surface,Position,447,3664,
60.7341,18.9117,81.6056,um,Surface,Position,447,3665,
30.4351,63.8411,39.6514,um,Surface,Position,447,3666,
56.8863,26.1281,19.9178,um,Surface,Position,447,3667,
24.1513,52.2611,42.4305,um,Surface,Position,447,3668,
40.8187,45.2699,19.1684,um,Surface,Position,447,3669,
55.211,37.8728,15.3459,um,Surface,Position,447,3670,
55.7344,14.6117,71.3525,um,Surface,Position,447,3671,
28.6392,54.3806,35.3331,um,Surface,Position,447,3672,
22.9386,54.5829,54.2465,um,Surface,Position,447,3673,
50.2689,19.1461,79.2904,um,Surface,Position,447,3674,
23.6579,57.3654,47.1708,um,Surface,Position,447,3675,
58.0053,32.0971,18.3725,um,Surface,Position,447,3676,
37.6125,33.8864,83.6585,um,Surface,Position,447,3677,
38.7318,57.5683,22.383,um,Surface,Position,447,3678,
69.9459,14.8467,37.4392,um,Surface,Position,447,3679,
38.8747,36.9536,23.8155,um,Surface,Position,447,3680,
56.665,10.4457,52.9963,um,Surface,Position,447,3681,
58.6217,17.4366,29.6426,um,Surface,Position,447,3682,
24.4823,45.5859,43.6258,um,Surface,Position,447,3683,
40.8136,31.0539,51.0804,um,Surface,Position,447,3684,
44.1525,17.6185,71.8294,um,Surface,Position,447,3685,
22.1612,45.586,57.5416,um,Surface,Position,447,3686,
30.3467,35.2277,72.8745,um,Surface,Position,447,3687,
26.0601,41.3086,66.2024,um,Surface,Position,447,3688,
54.7638,11.3307,63.4008,um,Surface,Position,447,3689,
63.3655,11.1057,53.5972,um,Surface,Position,447,3690,
28.9835,48.9448,33.936,um,Surface,Position,447,3691,
63.3645,16.2937,44.0599,um,Surface,Position,447,3692,
65.0201,18.9097,29.6922,um,Surface,Position,447,3693,
56.2525,13.4886,38.4628,um,Surface,Position,447,3694,
43.788,24.8833,31.0944,um,Surface,Position,447,3695,
28.6095,30.9128,54.2691,um,Surface,Position,447,3696,
37.843,30.396,29.9352,um,Surface,Position,447,3697,
47.0057,20.3577,43.1064,um,Surface,Position,447,3698,
51.2163,17.9623,31.1199,um,Surface,Position,447,3699,
32.7765,25.0322,62.6061,um,Surface,Position,447,3700,
23.2736,39.4017,56.3461,um,Surface,Position,447,3701,
45.2172,30.8625,22.7807,um,Surface,Position,447,3702,
53.4056,11.4754,44.8994,um,Surface,Position,447,3703,
50.0289,23.8256,23.7746,um,Surface,Position,447,3704,
30.7179,41.1899,32.5394,um,Surface,Position,447,3705,
37.6636,23.5292,73.8218,um,Surface,Position,447,3706,
39.9442,17.2692,51.3922,um,Surface,Position,447,3707,
38.2324,19.9514,60.0093,um,Surface,Position,447,3708,
37.416,23.6457,40.8005,um,Surface,Position,447,3709,
48.4246,12.6372,53.4423,um,Surface,Position,447,3710,
31.8335,32.6789,38.2288,um,Surface,Position,447,3711,
26.0987,38.1765,45.4422,um,Surface,Position,447,3712,
47.0295,13.1005,64.8473,um,Surface,Position,447,3713,

## Sheet: Pos_0001_end
Detailed
====================
Position X,Position Y,Position Z,Unit,Category,Collection,Time,ID,
70.6336,43.1969,66.4624,um,Surface,Position,447,2282,
53.381,67.7412,54.1336,um,Surface,Position,447,2283,
51.6445,65.7547,87.9251,um,Surface,Position,447,2284,
69.5535,42.3808,77.1217,um,Surface,Position,447,2285,
64.1892,57.197,57.0715,um,Surface,Position,447,2286,
64.0727,49.0153,91.644,um,Surface,Position,447,2287,
60.3579,55.5525,92.767,um,Surface,Position,447,2288,
46.6896,73.7573,82.6521,um,Surface,Position,447,2289,
62.4906,62.9117,60.8906,um,Surface,Position,447,2290,
67.9484,54.2414,61.9391,um,Surface,Position,447,2291,
52.5157,70.7378,63.644,um,Surface,Position,447,2292,
48.8888,75.3932,68.5241,um,Surface,Position,447,2293,
67.0506,55.7264,85.1609,um,Surface,Position,447,2294,
69.0048,53.0746,78.1134,um,Surface,Position,447,2295,
60.6355,67.3082,71.7732,um,Surface,Position,447,2296,
59.3426,62.1477,91.2911,um,Surface,Position,447,2297,
69.3989,58.1574,69.2676,um,Surface,Position,447,2298,
60.1823,67.3009,83.9856,um,Surface,Position,447,2299,
53.8199,73.8344,78.6741,um,Surface,Position,447,2300,
58.337,65.4891,91.0957,um,Surface,Position,447,2301,
66.3841,63.7182,77.9161,um,Surface,Position,447,2302,
59.3508,70.9963,75.2046,um,Surface,Position,447,2303,
45.8703,69.5041,56.4027,um,Surface,Position,447,2304,
65.8106,42.3244,87.0139,um,Surface,Position,447,2305,
42.4099,75.1365,57.6684,um,Surface,Position,447,2306,
38.7534,72.458,82.6665,um,Surface,Position,447,2307,
67.3194,49.0317,57.6101,um,Surface,Position,447,2308,
44.2675,55.9904,96.253,um,Surface,Position,447,2309,
67.8618,36.937,69.5542,um,Surface,Position,447,2310,
68.7604,42.0013,59.0748,um,Surface,Position,447,2311,
45.0262,61.1825,93.1676,um,Surface,Position,447,2312,
39.6491,75.1708,66.806,um,Surface,Position,447,2313,
38.8849,66.0007,88.6577,um,Surface,Position,447,2314,
30.9704,71.0701,79.5515,um,Surface,Position,447,2315,
32.2904,64.2972,103.884,um,Surface,Position,447,2316,
51.2434,55.3035,89.6614,um,Surface,Position,447,2317,
36.2761,76.1662,57.3976,um,Surface,Position,447,2318,
56.3301,47.0498,90.6652,um,Surface,Position,447,2319,
47.5941,63.796,49.1168,um,Surface,Position,447,2320,
26.4417,75.276,75.0805,um,Surface,Position,447,2321,
66.5583,34.1893,78.6064,um,Surface,Position,447,2322,
66.203,34.6724,63.0607,um,Surface,Position,447,2323,
43.3893,50.1916,86.9051,um,Surface,Position,447,2324,
61.8037,33.812,86.3718,um,Surface,Position,447,2325,
29.9032,72.0135,62.8519,um,Surface,Position,447,2326,
26.0283,63.4433,99.7384,um,Surface,Position,447,2327,
58.9265,47.1983,46.4163,um,Surface,Position,447,2328,
62.6589,35.9059,51.9658,um,Surface,Position,447,2329,
57.055,36.4407,94.4647,um,Surface,Position,447,2330,
32.4022,69.776,50.4342,um,Surface,Position,447,2331,
63.5853,30.3181,71.857,um,Surface,Position,447,2332,
38.2617,54.202,92.0974,um,Surface,Position,447,2333,
56.0221,30.6344,89.3771,um,Surface,Position,447,2334,
23.7106,71.2436,59.9845,um,Surface,Position,447,2335,
59.0498,39.9999,47.1623,um,Surface,Position,447,2336,
52.322,55.6394,43.6994,um,Surface,Position,447,2337,
39.3186,64.3519,48.4921,um,Surface,Position,447,2338,
47.705,42.1273,93.6385,um,Surface,Position,447,2339,
60.9588,28.2095,79.9172,um,Surface,Position,447,2340,
44.4393,34.9504,98.337,um,Surface,Position,447,2341,
30.0115,58.2668,81.0051,um,Surface,Position,447,2342,
26.8098,60.853,81.7202,um,Surface,Position,447,2343,
61.8559,27.6534,64.5378,um,Surface,Position,447,2344,
32.2852,59.5662,45.7251,um,Surface,Position,447,2345,
38.9979,42.1933,91.7496,um,Surface,Position,447,2346,
22.1503,66.8385,71.4633,um,Surface,Position,447,2347,
42.5944,52.1119,43.0872,um,Surface,Position,447,2348,
50.9152,44.8749,45.6381,um,Surface,Position,447,2349,
22.138,64.4471,52.7223,um,Surface,Position,447,2350,
52.4237,26.913,84.9227,um,Surface,Position,447,2351,
57.3008,31.4378,54.3709,um,Surface,Position,447,2352,
55.951,23.7167,76.2659,um,Surface,Position,447,2353,
48.617,31.0372,91.3783,um,Surface,Position,447,2354,
55.0067,23.8207,63.7329,um,Surface,Position,447,2355,
37.1192,48.716,44.8595,um,Surface,Position,447,2356,
26.7633,51.9548,86.6316,um,Surface,Position,447,2357,
32.6682,48.9139,93.7388,um,Surface,Position,447,2358,
29.4709,45.85,82.1015,um,Surface,Position,447,2359,
16.1968,61.7046,67.1589,um,Surface,Position,447,2360,
25.0583,47.4718,80.828,um,Surface,Position,447,2361,
36.6334,34.1741,96.0834,um,Surface,Position,447,2362,
31.2631,42.2283,97.1216,um,Surface,Position,447,2363,
18.8839,59.7381,77.7935,um,Surface,Position,447,2364,
45.0908,40.4324,42.3265,um,Surface,Position,447,2365,
52.4958,33.311,45.773,um,Surface,Position,447,2366,
38.7245,39.6503,42.0542,um,Surface,Position,447,2367,
37.8609,28.4777,88.5944,um,Surface,Position,447,2368,
48.4007,28.1191,53.5229,um,Surface,Position,447,2369,
49.021,22.6479,59.3338,um,Surface,Position,447,2370,
46.7429,19.2412,69.1734,um,Surface,Position,447,2371,
19.5997,58.62,54.4495,um,Surface,Position,447,2372,
25.1279,57.7486,47.107,um,Surface,Position,447,2373,
46.6501,21.129,77.5258,um,Surface,Position,447,2374,
15.3986,50.3562,76.5284,um,Surface,Position,447,2375,
23.0319,48.6108,48.4006,um,Surface,Position,447,2376,
40.7262,29.3446,47.5346,um,Surface,Position,447,2377,
28.0043,35.7276,94.4801,um,Surface,Position,447,2378,
13.8114,57.3895,60.908,um,Surface,Position,447,2379,
18.6249,51.5574,67.346,um,Surface,Position,447,2380,
29.4999,48.5642,41.8538,um,Surface,Position,447,2381,
40.4086,21.6031,82.5831,um,Surface,Position,447,2382,
29.973,25.9336,82.5728,um,Surface,Position,447,2383,
17.4562,50.0679,54.9187,um,Surface,Position,447,2384,
14.2685,43.6101,67.7122,um,Surface,Position,447,2385,
22.4869,35.6941,87.6407,um,Surface,Position,447,2386,
32.9711,22.7021,81.439,um,Surface,Position,447,2387,
34.2585,22.588,75.0913,um,Surface,Position,447,2388,
18.7478,45.3638,82.6378,um,Surface,Position,447,2389,
30.5878,31.2115,85.4154,um,Surface,Position,447,2390,
15.9425,38.0205,65.2622,um,Surface,Position,447,2391,
22.0515,30.4227,80.601,um,Surface,Position,447,2392,
14.7056,45.2826,55.3289,um,Surface,Position,447,2393,
38.7008,19.6346,66.6644,um,Surface,Position,447,2394,
22.5185,42.1342,44.8366,um,Surface,Position,447,2395,
19.8977,35.3461,76.3488,um,Surface,Position,447,2396,
40.1072,22.5196,54.8516,um,Surface,Position,447,2397,
32.1258,36.0252,47.1326,um,Surface,Position,447,2398,
22.9099,26.9533,57.5145,um,Surface,Position,447,2399,
17.0331,39.8475,53.7606,um,Surface,Position,447,2400,
20.8027,32.6519,51.3225,um,Surface,Position,447,2401,
27.4806,22.5365,64.1147,um,Surface,Position,447,2402,
19.653,30.0776,64.1414,um,Surface,Position,447,2403,
28.8449,24.569,55.0728,um,Surface,Position,447,2404,
23.1637,27.1731,75.8162,um,Surface,Position,447,2405,
26.5411,24.892,71.9495,um,Surface,Position,447,2406,

## Sheet: Pos_0002_end
Detailed
====================
Position X,Position Y,Position Z,Unit,Category,Collection,Time,ID,
54.4327,52.6448,32.6255,um,Surface,Position,447,217,
46.96,58.7628,50.2877,um,Surface,Position,447,218,
48.9448,60.9287,38.213,um,Surface,Position,447,219,
53.3178,53.99,48.0058,um,Surface,Position,447,220,
57.5205,54.3525,42.5578,um,Surface,Position,447,221,
38.7829,55.0569,54.8,um,Surface,Position,447,222,
53.2929,49.1505,53.1164,um,Surface,Position,447,223,
42.6413,55.5563,44.8011,um,Surface,Position,447,224,
45.9274,52.5373,60.1396,um,Surface,Position,447,225,
36.9566,61.4717,44.7982,um,Surface,Position,447,226,
54.7997,44.1204,31.2502,um,Surface,Position,447,227,
44.9842,58.2214,33.032,um,Surface,Position,447,228,
38.0103,54.6009,52.1606,um,Surface,Position,447,229,
43.3564,54.4639,27.3174,um,Surface,Position,447,230,
49.8363,50.2068,26.6576,um,Surface,Position,447,231,
49.9322,43.2509,57.6986,um,Surface,Position,447,232,
49.3964,46.5481,39.1329,um,Surface,Position,447,233,
54.3787,38.9498,37.7815,um,Surface,Position,447,234,
55.6385,41.2386,46.8883,um,Surface,Position,447,235,
40.6063,47.6347,59.3302,um,Surface,Position,447,236,
35.3641,55.858,30.5177,um,Surface,Position,447,237,
29.7306,55.6915,49.4382,um,Surface,Position,447,238,
50.3127,38.0587,34.2838,um,Surface,Position,447,239,
42.4268,53.0658,20.888,um,Surface,Position,447,240,
31.0467,53.2607,53.6703,um,Surface,Position,447,241,
43.3055,41.1303,61.5725,um,Surface,Position,447,242,
51.1762,36.0013,54.6931,um,Surface,Position,447,243,
32.6396,48.1312,57.0076,um,Surface,Position,447,244,
52.3599,32.3879,47.9206,um,Surface,Position,447,245,
46.7865,37.8351,34.6226,um,Surface,Position,447,246,
49.7556,40.1982,24.8405,um,Surface,Position,447,247,
35.7848,55.4453,37.59,um,Surface,Position,447,248,
23.8253,55.5202,42.4044,um,Surface,Position,447,249,
40.9965,41.7151,28.207,um,Surface,Position,447,250,
35.503,40.874,59.7608,um,Surface,Position,447,251,
25.1228,50.7859,50.9285,um,Surface,Position,447,252,
50.5926,32.2954,27.4619,um,Surface,Position,447,253,
52.1012,32.8778,37.0478,um,Surface,Position,447,254,
43.4205,34.3163,58.6589,um,Surface,Position,447,255,
21.844,51.8119,38.9906,um,Surface,Position,447,256,
46.5674,29.8594,51.7441,um,Surface,Position,447,257,
37.2526,46.5268,26.8769,um,Surface,Position,447,258,
25.3054,48.7767,33.7589,um,Surface,Position,447,259,
36.1531,42.9236,16.2815,um,Surface,Position,447,260,
41.8143,28.4332,57.1775,um,Surface,Position,447,261,
27.5816,46.3397,28.5507,um,Surface,Position,447,262,
24.6391,44.1487,46.5382,um,Surface,Position,447,263,
42.8398,34.9858,20.8794,um,Surface,Position,447,264,
29.6629,42.0668,21.7108,um,Surface,Position,447,265,
18.4814,45.9647,46.3054,um,Surface,Position,447,266,
33.5993,34.765,58.9117,um,Surface,Position,447,267,
46.7989,28.1169,43.4726,um,Surface,Position,447,268,
48.2238,26.9171,32.2254,um,Surface,Position,447,269,
27.0992,39.9479,55.8596,um,Surface,Position,447,270,
22.2254,39.3158,50.3817,um,Surface,Position,447,271,
42.7006,29.0133,25.9934,um,Surface,Position,447,272,
21.5435,45.4727,38.3082,um,Surface,Position,447,273,
32.2373,33.3955,23.794,um,Surface,Position,447,274,
28.543,27.4917,39.8676,um,Surface,Position,447,275,
26.1707,30.9911,33.5324,um,Surface,Position,447,276,
24.9317,29.9993,44.4025,um,Surface,Position,447,277,
31.7885,28.4015,52.7525,um,Surface,Position,447,278,
35.5865,27.1053,34.8702,um,Surface,Position,447,279,
42.7964,23.2598,36.7971,um,Surface,Position,447,280,
39.6259,24.8265,29.512,um,Surface,Position,447,281,
21.0172,37.5774,41.3366,um,Surface,Position,447,282,
39.5873,22.7145,43.3503,um,Surface,Position,447,283,
25.6109,32.7652,51.9933,um,Surface,Position,447,284,
35.7813,29.8295,28.3494,um,Surface,Position,447,285,
24.1268,39.4706,30.0416,um,Surface,Position,447,286,
34.9147,29.356,43.8685,um,Surface,Position,447,287,
39.1707,25.6024,49.6361,um,Surface,Position,447,288,

## Sheet: Pos_0003_end
Detailed
====================
Position X,Position Y,Position Z,Unit,Category,Collection,Time,ID,
56.6281,102.997,61.9866,um,Surface,Position,447,377,
80.3116,79.1189,65.5928,um,Surface,Position,447,378,
76.6542,93.6276,35.8057,um,Surface,Position,447,379,
88.4176,76.4557,56.9281,um,Surface,Position,447,380,
76.3962,84.6825,70.5851,um,Surface,Position,447,381,
70.7923,91.0251,70.8534,um,Surface,Position,447,382,
93.613,74.8991,53.0282,um,Surface,Position,447,383,
65.283,105.298,44.2957,um,Surface,Position,447,384,
61.2504,106.546,53.3949,um,Surface,Position,447,385,
91.5017,79.2977,48.3233,um,Surface,Position,447,386,
85.4115,84.9778,62.0406,um,Surface,Position,447,387,
66.7519,99.0073,70.4575,um,Surface,Position,447,388,
87.6851,85.3095,46.7373,um,Surface,Position,447,389,
77.4121,98.0619,40.8951,um,Surface,Position,447,390,
76.7609,86.2369,75.9826,um,Surface,Position,447,391,
73.0119,100.385,62.743,um,Surface,Position,447,392,
83.3179,92.2227,41.5938,um,Surface,Position,447,393,
64.4475,105.375,62.3008,um,Surface,Position,447,394,
85.1742,91.7913,48.2985,um,Surface,Position,447,395,
82.0185,91.3967,64.5678,um,Surface,Position,447,396,
70.7654,105.134,52.9571,um,Surface,Position,447,397,
78.0347,99.6444,49.9166,um,Surface,Position,447,398,
78.691,99.0339,64.2635,um,Surface,Position,447,399,
83.9923,95.9346,51.7865,um,Surface,Position,447,400,
54.3813,98.3536,68.5658,um,Surface,Position,447,401,
57.3038,103.82,44.9976,um,Surface,Position,447,402,
79.8034,86.787,35.3884,um,Surface,Position,447,403,
53.8339,106.077,52.1759,um,Surface,Position,447,404,
63.7043,102.306,38.1907,um,Surface,Position,447,405,
58.8047,97.0699,72.8175,um,Surface,Position,447,406,
70.9004,97.6177,35.9427,um,Surface,Position,447,407,
76.4459,69.5352,73.2796,um,Surface,Position,447,408,
53.5379,92.5427,75.0339,um,Surface,Position,447,409,
87.4123,67.6726,57.2816,um,Surface,Position,447,410,
82.985,78.2023,35.3876,um,Surface,Position,447,411,
61.8194,86.2298,78.7401,um,Surface,Position,447,412,
83.7669,72.7854,64.9292,um,Surface,Position,447,413,
87.404,71.8496,43.3947,um,Surface,Position,447,414,
84.8588,70.1441,35.5583,um,Surface,Position,447,415,
45.8578,97.786,68.9517,um,Surface,Position,447,416,
65.9064,92.9389,29.9646,um,Surface,Position,447,417,
70.6084,87.5615,28.0934,um,Surface,Position,447,418,
84.6848,63.7269,42.833,um,Surface,Position,447,419,
69.6466,70.268,77.3101,um,Surface,Position,447,420,
59.7523,93.1802,25.2401,um,Surface,Position,447,421,
53.8032,96.1697,34.5688,um,Surface,Position,447,422,
73.4675,81.1872,27.3133,um,Surface,Position,447,423,
86.6092,63.1433,52.8576,um,Surface,Position,447,424,
58.5569,99.836,30.1807,um,Surface,Position,447,425,
79.7029,58.5016,64.3882,um,Surface,Position,447,426,
64.1742,79.6523,22.0774,um,Surface,Position,447,427,
62.4369,76.6456,83.3683,um,Surface,Position,447,428,
60.7862,88.6073,22.6041,um,Surface,Position,447,429,
78.9647,70.4215,30.9964,um,Surface,Position,447,430,
49.8824,101.1,41.1592,um,Surface,Position,447,431,
47.9747,82.2191,79.1362,um,Surface,Position,447,432,
80.4367,53.2795,49.4926,um,Surface,Position,447,433,
37.4484,93.3484,67.5235,um,Surface,Position,447,434,
79.345,60.2832,33.7911,um,Surface,Position,447,435,
72.045,71.6815,26.3178,um,Surface,Position,447,436,
40.4902,89.5161,71.67,um,Surface,Position,447,437,
41.3753,101.215,53.6585,um,Surface,Position,447,438,
73.9126,61.9305,26.1684,um,Surface,Position,447,439,
40.1603,91.4087,38.8331,um,Surface,Position,447,440,
59.1088,64.0995,82.0461,um,Surface,Position,447,441,
76.66,48.7776,59.0565,um,Surface,Position,447,442,
34.3739,95.0704,60.8169,um,Surface,Position,447,443,
49.5979,73.3157,81.9847,um,Surface,Position,447,444,
78.1571,53.3036,59.5605,um,Surface,Position,447,445,
75.2071,47.326,49.441,um,Surface,Position,447,446,
33.021,93.3685,44.5114,um,Surface,Position,447,447,
71.9171,49.5584,66.2922,um,Surface,Position,447,448,
78.1073,54.7011,40.0711,um,Surface,Position,447,449,
50.4257,84.2083,21.7439,um,Surface,Position,447,450,
33.6171,87.0505,69.6497,um,Surface,Position,447,451,
34.525,98.0386,47.0091,um,Surface,Position,447,452,
74.1452,54.6752,26.9901,um,Surface,Position,447,453,
46.0122,80.4176,28.2935,um,Surface,Position,447,454,
65.9383,49.9067,70.2075,um,Surface,Position,447,455,
64.654,70.5256,22.7384,um,Surface,Position,447,456,
36.4581,80.6016,75.6147,um,Surface,Position,447,457,
62.8967,53.6035,76.5721,um,Surface,Position,447,458,
51.5772,78.5227,21.4124,um,Surface,Position,447,459,
30.9517,84.9845,57.6202,um,Surface,Position,447,460,
36.0664,71.3886,79.8401,um,Surface,Position,447,461,
28.4144,78.5158,65.7632,um,Surface,Position,447,462,
65.8631,60.837,22.6319,um,Surface,Position,447,463,
49.3048,61.5042,81.4347,um,Surface,Position,447,464,
28.5331,89.3245,48.522,um,Surface,Position,447,465,
49.0988,70.34,22.1248,um,Surface,Position,447,466,
28.6924,82.8312,47.6401,um,Surface,Position,447,467,
66.9902,43.4029,59.6105,um,Surface,Position,447,468,
63.9112,45.6823,66.6225,um,Surface,Position,447,469,
66.5372,51.0736,31.8331,um,Surface,Position,447,470,
69.0218,45.8451,42.4171,um,Surface,Position,447,471,
41.3145,56.0822,79.1406,um,Surface,Position,447,472,
64.7493,41.6827,52.8522,um,Surface,Position,447,473,
40.9114,81.0303,26.4394,um,Surface,Position,447,474,
58.9108,59.8592,22.5198,um,Surface,Position,447,475,
33.5896,85.1727,37.9599,um,Surface,Position,447,476,
69.7726,44.3612,48.8033,um,Surface,Position,447,477,
23.1536,80.4269,55.5352,um,Surface,Position,447,478,
56.462,43.4007,69.7416,um,Surface,Position,447,479,
41.0267,71.9884,23.9123,um,Surface,Position,447,480,
49.466,64.1926,21.5377,um,Surface,Position,447,481,
36.6716,63.5553,78.867,um,Surface,Position,447,482,
29.6752,76.2701,70.6431,um,Surface,Position,447,483,
50.1244,52.5851,78.1965,um,Surface,Position,447,484,
52.0667,55.2321,23.4175,um,Surface,Position,447,485,
25.5679,77.2737,46.0391,um,Surface,Position,447,486,
37.6946,64.4227,31.2037,um,Surface,Position,447,487,
38.7545,63.8895,46.3282,um,Surface,Position,447,488,
26.9495,68.1973,71.2784,um,Surface,Position,447,489,
26.8308,77.929,39.1988,um,Surface,Position,447,490,
63.3993,43.4615,41.4512,um,Surface,Position,447,491,
54.7957,39.4561,52.5998,um,Surface,Position,447,492,
27.3053,72.4947,52.5764,um,Surface,Position,447,493,
57.3231,44.9023,33.1945,um,Surface,Position,447,494,
46.7748,47.5059,71.0735,um,Surface,Position,447,495,
51.6333,45.4374,60.0278,um,Surface,Position,447,496,
33.4617,70.6501,39.7279,um,Surface,Position,447,497,
40.0382,60.2139,46.0087,um,Surface,Position,447,498,
25.5528,65.5951,45.5239,um,Surface,Position,447,499,
32.1148,57.6145,58.48,um,Surface,Position,447,500,
52.1444,41.0747,49.303,um,Surface,Position,447,501,
31.6903,72.4242,27.7017,um,Surface,Position,447,502,
54.4818,41.1813,39.3495,um,Surface,Position,447,503,
28.6563,58.6244,72.3466,um,Surface,Position,447,504,
52.0386,50.1732,27.9739,um,Surface,Position,447,505,
28.2811,58.4946,51.2826,um,Surface,Position,447,506,
38.726,50.4436,74.4229,um,Surface,Position,447,507,
34.7476,47.7959,67.4105,um,Surface,Position,447,508,
47.7204,42.6635,38.6401,um,Surface,Position,447,509,
39.5787,64.5128,26.3334,um,Surface,Position,447,510,
25.4438,67.7241,56.4962,um,Surface,Position,447,511,
22.1088,62.9602,62.1721,um,Surface,Position,447,512,
36.5381,55.8173,43.7413,um,Surface,Position,447,513,
40.5145,44.2104,45.3416,um,Surface,Position,447,514,
45.7135,40.9995,43.4166,um,Surface,Position,447,515,
29.4577,57.6228,39.8563,um,Surface,Position,447,516,
17.8913,67.8928,42.6143,um,Surface,Position,447,517,
36.1369,55.8821,28.344,um,Surface,Position,447,518,
45.2899,47.4683,29.7553,um,Surface,Position,447,519,
37.9697,42.1091,58.3761,um,Surface,Position,447,520,
36.7694,47.0916,35.9269,um,Surface,Position,447,521,
30.4043,56.4124,32.467,um,Surface,Position,447,522,
33.7769,49.5101,55.4589,um,Surface,Position,447,523,
29.5306,53.9154,63.2856,um,Surface,Position,447,524,
42.718,38.9413,59.7367,um,Surface,Position,447,525,

## Sheet: Pos_0004_end
Detailed
====================
Position X,Position Y,Position Z,Unit,Category,Collection,Time,ID,
53.1456,85.8341,30.4933,um,Surface,Position,447,399,
58.6507,82.4473,24.2769,um,Surface,Position,447,400,
73.9308,61.2419,51.6083,um,Surface,Position,447,401,
61.2117,71.8921,58.0934,um,Surface,Position,447,402,
56.7923,78.4581,55.8059,um,Surface,Position,447,403,
76.8681,62.6233,44.5842,um,Surface,Position,447,404,
52.5773,86.219,39.2775,um,Surface,Position,447,405,
64.1674,80.4529,36.0008,um,Surface,Position,447,406,
70.8168,68.4248,50.818,um,Surface,Position,447,407,
70.2154,74.705,31.194,um,Surface,Position,447,408,
59.1241,80.6115,47.4284,um,Surface,Position,447,409,
66.3785,74.1479,49.358,um,Surface,Position,447,410,
75.6301,68.3454,38.2459,um,Surface,Position,447,411,
71.2439,58.0386,58.2712,um,Surface,Position,447,412,
48.0706,78.2419,59.9958,um,Surface,Position,447,413,
76.9585,54.9116,46.8075,um,Surface,Position,447,414,
77.9899,59.7111,35.8467,um,Surface,Position,447,415,
65.0953,76.853,22.5567,um,Surface,Position,447,416,
46.8215,85.1758,47.6868,um,Surface,Position,447,417,
74.4283,65.2532,28.9657,um,Surface,Position,447,418,
41.2868,88.1487,30.8693,um,Surface,Position,447,419,
62.4972,58.1468,63.3097,um,Surface,Position,447,420,
47.7597,85.1521,22.7522,um,Surface,Position,447,421,
57.2479,62.1462,67.7434,um,Surface,Position,447,422,
63.2317,63.7814,62.074,um,Surface,Position,447,423,
34.9981,87.7901,37.6593,um,Surface,Position,447,424,
66.0508,52.2926,62.4423,um,Surface,Position,447,425,
44.6257,70.9471,67.6591,um,Surface,Position,447,426,
38.7562,85.9754,44.9051,um,Surface,Position,447,427,
77.2586,47.6199,45.7038,um,Surface,Position,447,428,
74.3649,56.3704,26.6648,um,Surface,Position,447,429,
78.2524,51.5649,37.5426,um,Surface,Position,447,430,
51.9485,77.8073,14.1438,um,Surface,Position,447,431,
36.2152,77.5042,59.8885,um,Surface,Position,447,432,
50.3743,63.9993,68.7845,um,Surface,Position,447,433,
54.6214,72.435,10.2829,um,Surface,Position,447,434,
72.8467,48.102,54.157,um,Surface,Position,447,435,
65.9839,66.4846,16.5553,um,Surface,Position,447,436,
79.8461,47.2736,32.8935,um,Surface,Position,447,437,
56.4005,63.6055,6.58714,um,Surface,Position,447,438,
38.5797,81.2505,16.9367,um,Surface,Position,447,439,
29.2394,80.4174,52.0847,um,Surface,Position,447,440,
75.6766,40.9555,37.2976,um,Surface,Position,447,441,
69.4427,40.4213,56.9737,um,Surface,Position,447,442,
65.9615,45.222,62.1262,um,Surface,Position,447,443,
75.2475,44.9906,25.6195,um,Surface,Position,447,444,
44.1831,57.0391,71.6696,um,Surface,Position,447,445,
65.8019,54.1778,11.3394,um,Surface,Position,447,446,
59.9227,60.5642,9.26636,um,Surface,Position,447,447,
40.5145,62.2892,70.2727,um,Surface,Position,447,448,
33.4605,69.707,66.6029,um,Surface,Position,447,449,
72.4321,38.2569,45.4771,um,Surface,Position,447,450,
55.016,52.2688,70.6729,um,Surface,Position,447,451,
60.6733,39.4393,62.9762,um,Surface,Position,447,452,
48.2191,47.8022,71.6027,um,Surface,Position,447,453,
49.6913,66.0142,5.64557,um,Surface,Position,447,454,
55.6152,42.2204,70.469,um,Surface,Position,447,455,
27.4987,73.8866,60.9556,um,Surface,Position,447,456,
30.6483,81.3278,22.9019,um,Surface,Position,447,457,
26.2578,82.9215,41.8096,um,Surface,Position,447,458,
61.3901,48.0734,6.14616,um,Surface,Position,447,459,
56.5685,35.1174,65.271,um,Surface,Position,447,460,
22.1062,80.3231,30.7317,um,Surface,Position,447,461,
69.8046,32.111,39.9334,um,Surface,Position,447,462,
21.1601,76.9517,49.1194,um,Surface,Position,447,463,
67.6403,44.4945,13.7376,um,Surface,Position,447,464,
71.886,39.2368,20.5634,um,Surface,Position,447,465,
31.0134,56.6868,69.0184,um,Surface,Position,447,466,
48.3775,39.2993,71.2674,um,Surface,Position,447,467,
24.9028,76.2139,20.4511,um,Surface,Position,447,468,
69.8264,33.2067,25.401,um,Surface,Position,447,469,
27.8479,62.3768,66.7957,um,Surface,Position,447,470,
41.6721,68.1111,5.02224,um,Surface,Position,447,471,
53.7659,55.9731,4.30806,um,Surface,Position,447,472,
46.2899,57.0673,2.42652,um,Surface,Position,447,473,
40.6568,42.4392,71.3333,um,Surface,Position,447,474,
64.5174,28.1943,44.011,um,Surface,Position,447,475,
17.2536,74.0957,42.6561,um,Surface,Position,447,476,
62.1637,32.9848,52.1086,um,Surface,Position,447,477,
34.3694,71.2667,9.06581,um,Surface,Position,447,478,
19.455,72.5616,54.4428,um,Surface,Position,447,479,
16.2334,73.3508,30.5923,um,Surface,Position,447,480,
14.6319,69.6784,49.7776,um,Surface,Position,447,481,
52.1236,45.779,4.2094,um,Surface,Position,447,482,
64.7335,23.5072,37.4593,um,Surface,Position,447,483,
63.931,32.7123,17.2164,um,Surface,Position,447,484,
59.2837,36.7061,10.8507,um,Surface,Position,447,485,
50.9029,30.9454,63.699,um,Surface,Position,447,486,
20.0682,54.6784,61.1751,um,Surface,Position,447,487,
62.6188,25.9234,23.4222,um,Surface,Position,447,488,
23.1173,66.6899,14.4765,um,Surface,Position,447,489,
59.6685,28.9699,15.4502,um,Surface,Position,447,490,
28.2405,49.0657,68.5036,um,Surface,Position,447,491,
18.1787,61.3271,57.2347,um,Surface,Position,447,492,
48.4792,37.0808,6.72516,um,Surface,Position,447,493,
28.7649,60.4063,9.46763,um,Surface,Position,447,494,
39.8207,31.1279,64.2586,um,Surface,Position,447,495,
11.99,65.3696,46.0874,um,Surface,Position,447,496,
38.037,53.1317,2.92708,um,Surface,Position,447,497,
32.4357,39.004,68.1321,um,Surface,Position,447,498,
11.8149,67.4444,37.0184,um,Surface,Position,447,499,
9.51923,59.5899,43.4247,um,Surface,Position,447,500,
54.4488,22.0989,38.2784,um,Surface,Position,447,501,
27.4734,54.7567,9.48219,um,Surface,Position,447,502,
50.0814,27.6035,14.1542,um,Surface,Position,447,503,
16.1465,62.3872,21.4019,um,Surface,Position,447,504,
58.5377,20.978,30.6475,um,Surface,Position,447,505,
50.8398,23.877,49.6348,um,Surface,Position,447,506,
16.4019,55.3742,17.9049,um,Surface,Position,447,507,
24.0261,35.563,62.6162,um,Surface,Position,447,508,
18.6673,44.056,61.9629,um,Surface,Position,447,509,
9.78889,59.3262,31.6262,um,Surface,Position,447,510,
42.5947,24.808,56.3599,um,Surface,Position,447,511,
38.5781,42.1416,4.56175,um,Surface,Position,447,512,
53.2584,22.895,24.1824,um,Surface,Position,447,513,
20.6534,49.6898,13.8448,um,Surface,Position,447,514,
35.1409,36.1004,8.23813,um,Surface,Position,447,515,
45.9377,20.0893,28.5439,um,Surface,Position,447,516,
29.8455,45.4959,6.97312,um,Surface,Position,447,517,
14.2238,45.5838,55.3768,um,Surface,Position,447,518,
42.7278,20.4259,38.3233,um,Surface,Position,447,519,
10.6499,52.427,49.7652,um,Surface,Position,447,520,
15.6928,45.0094,18.4502,um,Surface,Position,447,521,
10.9511,43.5583,45.8024,um,Surface,Position,447,522,
9.12024,50.3048,39.9503,um,Surface,Position,447,523,
42.0933,21.3196,22.2359,um,Surface,Position,447,524,
37.2916,19.4206,48.3983,um,Surface,Position,447,525,
41.084,27.0206,13.4068,um,Surface,Position,447,526,
31.3138,24.2398,55.0488,um,Surface,Position,447,527,
25.2864,24.2952,47.1944,um,Surface,Position,447,528,
32.9811,23.04,25.2453,um,Surface,Position,447,529,
21.6412,38.1829,15.5272,um,Surface,Position,447,530,
29.6902,31.6647,14.6054,um,Surface,Position,447,531,
31.479,20.0543,45.3493,um,Surface,Position,447,532,
20.7507,30.0842,52.4619,um,Surface,Position,447,533,
11.2948,47.0436,26.1164,um,Surface,Position,447,534,
11.9193,37.8115,34.9931,um,Surface,Position,447,535,
18.6484,32.9784,23.3798,um,Surface,Position,447,536,
13.4783,38.3989,26.0977,um,Surface,Position,447,537,
21.3782,26.6722,39.7828,um,Surface,Position,447,538,
27.0827,23.3479,30.9775,um,Surface,Position,447,539,
28.6658,21.3786,39.2028,um,Surface,Position,447,540,
16.0541,33.2705,45.4937,um,Surface,Position,447,541,

## Sheet: Pos_0005_end
Detailed
====================
Position X,Position Y,Position Z,Unit,Category,Collection,Time,ID,
126.089,88.059,104.515,um,Surface,Position,450,433,
134.767,93.4372,59.1815,um,Surface,Position,450,434,
127.822,103.088,50.0336,um,Surface,Position,450,435,
92.9914,127.911,96.2382,um,Surface,Position,450,436,
118.201,99.1157,109.22,um,Surface,Position,450,437,
100.326,130.743,64.781,um,Surface,Position,450,438,
92.0928,134.331,73.6422,um,Surface,Position,450,439,
104.927,111.17,112.277,um,Surface,Position,450,440,
90.7417,133.248,85.3728,um,Surface,Position,450,441,
111.215,108.394,109.643,um,Surface,Position,450,442,
98.8732,130.782,58.4124,um,Surface,Position,450,443,
133.136,100.709,70.1172,um,Surface,Position,450,444,
127.077,98.9464,96.1661,um,Surface,Position,450,445,
107.556,115.535,106.562,um,Surface,Position,450,446,
99.3337,126.844,92.9127,um,Surface,Position,450,447,
119.461,108.151,99.2465,um,Surface,Position,450,448,
127.193,109.153,64.7343,um,Surface,Position,450,449,
111.28,124.822,66.0977,um,Surface,Position,450,450,
128.374,105.869,82.6919,um,Surface,Position,450,451,
121.101,113.557,86.1873,um,Surface,Position,450,452,
104.698,128.755,76.7158,um,Surface,Position,450,453,
120.763,115.993,76.2674,um,Surface,Position,450,454,
79.9416,134.683,59.7264,um,Surface,Position,450,455,
138.2,74.1703,59.2048,um,Surface,Position,450,456,
86.3684,120.979,111.051,um,Surface,Position,450,457,
79.7241,134.88,80.7543,um,Surface,Position,450,458,
89.7012,132.178,52.6949,um,Surface,Position,450,459,
138.288,82.778,67.1943,um,Surface,Position,450,460,
122.32,91.6279,101.359,um,Surface,Position,450,461,
82.9834,128.296,101.757,um,Surface,Position,450,462,
133.226,88.4032,91.5709,um,Surface,Position,450,463,
115.972,115.676,46.9303,um,Surface,Position,450,464,
109.738,119.266,43.1107,um,Surface,Position,450,465,
77.0864,132.385,48.9699,um,Surface,Position,450,466,
69.8308,124.289,107.985,um,Surface,Position,450,467,
114.44,82.4347,117.171,um,Surface,Position,450,468,
90.3466,124.892,39.0426,um,Surface,Position,450,469,
86.107,129.071,46.0266,um,Surface,Position,450,470,
132.119,70.9211,99.993,um,Surface,Position,450,471,
72.4941,130.044,96.5282,um,Surface,Position,450,472,
120.806,98.4929,35.8139,um,Surface,Position,450,473,
123.132,76.847,109.872,um,Surface,Position,450,474,
110.812,93.5345,116.225,um,Surface,Position,450,475,
92.209,105.365,123.229,um,Surface,Position,450,476,
121.198,89.5005,31.0748,um,Surface,Position,450,477,
82.1705,125.652,38.53,um,Surface,Position,450,478,
104.348,80.901,124.991,um,Surface,Position,450,479,
139.24,66.3202,65.692,um,Surface,Position,450,480,
137.926,59.1602,81.854,um,Surface,Position,450,481,
64.5973,134.99,81.4923,um,Surface,Position,450,482,
115.506,101.92,32.9845,um,Surface,Position,450,483,
129.511,86.5318,41.7557,um,Surface,Position,450,484,
97.7836,119.46,36.1093,um,Surface,Position,450,485,
139.326,66.4035,79.0553,um,Surface,Position,450,486,
55.1311,132.767,77.2518,um,Surface,Position,450,487,
82.5224,119.987,42.1185,um,Surface,Position,450,488,
59.5489,128.735,94.7864,um,Surface,Position,450,489,
113.367,66.3981,119.713,um,Surface,Position,450,490,
132.321,54.1635,93.2785,um,Surface,Position,450,491,
71.5216,110.93,120.384,um,Surface,Position,450,492,
132.182,74.3331,42.0884,um,Surface,Position,450,493,
68.3527,117.238,112.304,um,Surface,Position,450,494,
138.239,61.0227,61.6616,um,Surface,Position,450,495,
95.1148,92.8059,127.666,um,Surface,Position,450,496,
62.1342,129.855,47.9549,um,Surface,Position,450,497,
121.537,57.1116,110.837,um,Surface,Position,450,498,
135.97,55.2748,54.2356,um,Surface,Position,450,499,
99.4683,70.1774,127.641,um,Surface,Position,450,500,
81.3787,94.5754,128.203,um,Surface,Position,450,501,
71.491,125.15,38.6772,um,Surface,Position,450,502,
96.0143,109.982,26.3659,um,Surface,Position,450,503,
125.326,76.4074,31.7162,um,Surface,Position,450,504,
105.83,98.0741,23.5522,um,Surface,Position,450,505,
133.775,43.2089,68.0412,um,Surface,Position,450,506,
86.7519,71.3248,129.896,um,Surface,Position,450,507,
55.729,116.706,103.937,um,Surface,Position,450,508,
69.9739,116.713,23.9957,um,Surface,Position,450,509,
115.323,52.0902,113.75,um,Surface,Position,450,510,
48.1088,126.882,89.2611,um,Surface,Position,450,511,
107.21,89.7358,20.933,um,Surface,Position,450,512,
113.847,81.0319,22.0479,um,Surface,Position,450,513,
108.825,61.4824,121.096,um,Surface,Position,450,514,
57.8404,111.083,116.598,um,Surface,Position,450,515,
55.498,131.388,58.1265,um,Surface,Position,450,516,
75.5506,109.54,22.1081,um,Surface,Position,450,517,
129.333,51.2223,43.5497,um,Surface,Position,450,518,
52.9541,106.531,117.374,um,Surface,Position,450,519,
126.357,59.3759,32.0148,um,Surface,Position,450,520,
49.9345,124.467,46.734,um,Surface,Position,450,521,
61.3239,123.108,38.7469,um,Surface,Position,450,522,
44.5901,127.757,68.2927,um,Surface,Position,450,523,
68.7352,91.7761,128.478,um,Surface,Position,450,524,
113.12,75.2388,19.3579,um,Surface,Position,450,525,
94.0363,77.8264,129.331,um,Surface,Position,450,526,
129.129,43.8277,89.4595,um,Surface,Position,450,527,
30.6665,122.273,65.4418,um,Surface,Position,450,528,
55.2959,89.327,125.693,um,Surface,Position,450,529,
90.509,57.8835,128.365,um,Surface,Position,450,530,
99.9587,80.2785,14.4262,um,Surface,Position,450,531,
97.7895,79.9485,8.68684,um,Surface,Position,450,532,
42.2937,118.849,96.8728,um,Surface,Position,450,533,
120.059,36.0336,96.5194,um,Surface,Position,450,534,
77.3094,103.468,17.8182,um,Surface,Position,450,535,
106.565,70.9636,15.2707,um,Surface,Position,450,536,
39.4437,120.31,85.6283,um,Surface,Position,450,537,
43.6279,123.521,56.2839,um,Surface,Position,450,538,
72.4775,79.0033,130.355,um,Surface,Position,450,539,
45.734,114.59,39.5463,um,Surface,Position,450,540,
114.847,56.9806,25.1463,um,Surface,Position,450,541,
120.214,46.5816,33.9477,um,Surface,Position,450,542,
64.2476,105.361,22.5558,um,Surface,Position,450,543,
126.047,37.6493,49.361,um,Surface,Position,450,544,
40.2201,119.481,47.5887,um,Surface,Position,450,545,
58.9299,109.311,24.5751,um,Surface,Position,450,546,
51.2036,114.941,32.9742,um,Surface,Position,450,547,
28.8857,114.329,64.6691,um,Surface,Position,450,548,
99.7561,66.7129,11.6953,um,Surface,Position,450,549,
53.0219,108.598,29.2056,um,Surface,Position,450,550,
37.2992,106.167,103.763,um,Surface,Position,450,551,
34.2524,118.98,64.3173,um,Surface,Position,450,552,
86.4579,85.542,9.51093,um,Surface,Position,450,553,
31.3874,116.146,83.1121,um,Surface,Position,450,554,
100.615,41.6187,117.291,um,Surface,Position,450,555,
42.7868,95.3681,117.19,um,Surface,Position,450,556,
120.183,31.852,47.3821,um,Surface,Position,450,557,
119.74,26.1817,71.9291,um,Surface,Position,450,558,
112.762,26.4009,91.7327,um,Surface,Position,450,559,
22.7534,117.535,69.9097,um,Surface,Position,450,560,
29.7662,108.12,94.601,um,Surface,Position,450,561,
63.7682,66.7238,129.008,um,Surface,Position,450,562,
71.0496,93.06,12.3972,um,Surface,Position,450,563,
64.9881,97.8375,13.8933,um,Surface,Position,450,564,
109.943,31.2386,103.102,um,Surface,Position,450,565,
76.3687,86.7969,8.98968,um,Surface,Position,450,566,
76.4089,74.8727,7.63934,um,Surface,Position,450,567,
58.3434,92.5963,14.2771,um,Surface,Position,450,568,
29.913,94.866,107.881,um,Surface,Position,450,569,
35.3408,109.433,41.0668,um,Surface,Position,450,570,
115.748,23.6445,55.6202,um,Surface,Position,450,571,
35.1284,89.5175,114.331,um,Surface,Position,450,572,
27.7589,99.5627,97.3577,um,Surface,Position,450,573,
26.267,108.679,82.6573,um,Surface,Position,450,574,
43.5537,81.7842,122.354,um,Surface,Position,450,575,
65.596,57.2186,128.045,um,Surface,Position,450,576,
93.886,67.8092,7.99492,um,Surface,Position,450,577,
93.8309,23.7475,100.224,um,Surface,Position,450,578,
20.7886,105.519,69.1798,um,Surface,Position,450,579,
55.2346,84.407,12.2924,um,Surface,Position,450,580,
102.255,32.9701,29.1541,um,Surface,Position,450,581,
107.68,25.2401,40.6343,um,Surface,Position,450,582,
100.47,19.0447,88.1213,um,Surface,Position,450,583,
66.3127,45.7398,123.537,um,Surface,Position,450,584,
48.2006,93.6583,18.6758,um,Surface,Position,450,585,
22.5236,99.745,90.0927,um,Surface,Position,450,586,
110.156,19.434,70.6173,um,Surface,Position,450,587,
77.8272,39.1989,120.173,um,Surface,Position,450,588,
43.9974,100.821,26.8338,um,Surface,Position,450,589,
78.287,54.8176,8.80492,um,Surface,Position,450,590,
58.9647,71.6555,9.60211,um,Surface,Position,450,591,
94.4981,39.4147,19.2911,um,Surface,Position,450,592,
37.4533,90.5864,25.2091,um,Surface,Position,450,593,
28.7327,78.36,111.499,um,Surface,Position,450,594,
17.6596,93.3557,85.724,um,Surface,Position,450,595,
33.8129,71.5554,115.999,um,Surface,Position,450,596,
21.4184,87.087,99.9949,um,Surface,Position,450,597,
21.6431,103.107,54.2576,um,Surface,Position,450,598,
103.606,18.8906,47.7236,um,Surface,Position,450,599,
53.0082,53.5746,122.351,um,Surface,Position,450,600,
81.1213,29.2948,112.689,um,Surface,Position,450,601,
54.4176,38.7995,113.801,um,Surface,Position,450,602,
82.72,16.0671,87.5241,um,Surface,Position,450,603,
78.4942,42.9567,14.1263,um,Surface,Position,450,604,
18.4395,79.0259,96.4433,um,Surface,Position,450,605,
96.3099,17.3545,49.208,um,Surface,Position,450,606,
64.3951,33.3081,114.042,um,Surface,Position,450,607,
72.1382,25.1361,107.498,um,Surface,Position,450,608,
27.2966,93.6768,36.6576,um,Surface,Position,450,609,
41.5375,55.4048,116.92,um,Surface,Position,450,610,
71.9876,54.4091,9.25675,um,Surface,Position,450,611,
15.6585,95.7161,69.7647,um,Surface,Position,450,612,
23.4975,79.5105,105.053,um,Surface,Position,450,613,
67.2127,16.0869,84.1,um,Surface,Position,450,614,
12.7962,80.7865,57.5671,um,Surface,Position,450,615,
40.5785,43.5705,109.124,um,Surface,Position,450,616,
64.6893,21.0386,96.634,um,Surface,Position,450,617,
14.7277,73.1405,88.4644,um,Surface,Position,450,618,
12.6104,80.8529,72.943,um,Surface,Position,450,619,
86.0232,16.6626,44.8881,um,Surface,Position,450,620,
89.3001,22.8556,33.0766,um,Surface,Position,450,621,
90.3563,11.6392,62.1878,um,Surface,Position,450,622,
49.133,65.8176,15.1499,um,Surface,Position,450,623,
27.6676,63.3128,108.729,um,Surface,Position,450,624,
91.7459,15.8401,49.875,um,Surface,Position,450,625,
28.233,45.0727,98.0943,um,Surface,Position,450,626,
39.328,33.4265,98.5783,um,Surface,Position,450,627,
20.3776,53.931,91.8501,um,Surface,Position,450,628,
55.2451,22.2433,89.7834,um,Surface,Position,450,629,
66.6147,26.2666,28.3457,um,Surface,Position,450,630,
15.313,63.723,83.0785,um,Surface,Position,450,631,
12.4644,69.6625,67.1576,um,Surface,Position,450,632,
63.4876,40.4463,17.8384,um,Surface,Position,450,633,
54.2251,27.5523,102.31,um,Surface,Position,450,634,
26.804,72.8406,32.4799,um,Surface,Position,450,635,
77.6381,11.8748,60.0737,um,Surface,Position,450,636,
37.9674,65.5912,22.543,um,Surface,Position,450,637,
57.1896,17.136,49.7664,um,Surface,Position,450,638,
43.796,21.9063,77.9268,um,Surface,Position,450,639,
58.2033,14.7566,60.9743,um,Surface,Position,450,640,
17.3612,50.6346,80.1973,um,Surface,Position,450,641,
16.3446,58.1113,72.9203,um,Surface,Position,450,642,
36.2934,49.0183,30.5361,um,Surface,Position,450,643,
16.7534,61.4143,56.6997,um,Surface,Position,450,644,
25.6235,56.0199,39.1954,um,Surface,Position,450,645,
66.9465,18.9142,38.9324,um,Surface,Position,450,646,
20.1547,61.6874,46.9608,um,Surface,Position,450,647,
48.0669,41.5489,25.0328,um,Surface,Position,450,648,
58.5873,15.8143,76.5041,um,Surface,Position,450,649,
19.8259,11.8972,59.9795,um,Surface,Position,450,650,
30.8447,33.2431,56.4452,um,Surface,Position,450,651,
21.3415,43.8263,70.5516,um,Surface,Position,450,652,
37.5112,26.1465,67.839,um,Surface,Position,450,653,
31.0132,31.2025,68.8995,um,Surface,Position,450,654,
45.7867,20.218,63.8817,um,Surface,Position,450,655,
44.2451,24.0807,49.3828,um,Surface,Position,450,656,
24.5917,48.6683,45.0319,um,Surface,Position,450,657,
28.8543,33.0176,79.7456,um,Surface,Position,450,658,
41.4372,34.0972,37.4449,um,Surface,Position,450,659,
24.4813,41.5104,84.3029,um,Surface,Position,450,660,

## Sheet: Pos_0006_end
Detailed
====================
Position X,Position Y,Position Z,Unit,Category,Collection,Time,ID,
67.9146,87.3809,39.9358,um,Surface,Position,450,836,
82.1316,75.6627,39.8237,um,Surface,Position,450,837,
59.814,87.9149,73.5397,um,Surface,Position,450,838,
74.0375,73.3546,80.4707,um,Surface,Position,450,839,
66.902,88.0177,47.9622,um,Surface,Position,450,840,
80.6577,78.8064,46.0952,um,Surface,Position,450,841,
78.6031,68.1504,76.0299,um,Surface,Position,450,842,
97.0177,57.8217,48.8812,um,Surface,Position,450,843,
77.2424,79.7485,73.7706,um,Surface,Position,450,844,
74.495,85.358,44.1512,um,Surface,Position,450,845,
63.7697,90.4676,57.187,um,Surface,Position,450,846,
68.5347,79.8964,77.0476,um,Surface,Position,450,847,
92.8095,64.0751,56.7685,um,Surface,Position,450,848,
70.5716,73.2783,88.4444,um,Surface,Position,450,849,
86.1911,68.5694,73.0221,um,Surface,Position,450,850,
71.6154,84.9664,69.5707,um,Surface,Position,450,851,
74.3238,88.251,52.9779,um,Surface,Position,450,852,
93.4093,64.2307,46.8973,um,Surface,Position,450,853,
64.9105,83.61,79.8706,um,Surface,Position,450,854,
87.5971,72.1749,48.0228,um,Surface,Position,450,855,
90.5885,64.993,67.4862,um,Surface,Position,450,856,
64.2434,90.5012,67.005,um,Surface,Position,450,857,
69.3877,90.4595,61.7523,um,Surface,Position,450,858,
89.4161,70.9289,60.5631,um,Surface,Position,450,859,
86.2822,75.7577,56.318,um,Surface,Position,450,860,
84.666,77.2505,65.3547,um,Surface,Position,450,861,
82.5711,82.9676,55.4638,um,Surface,Position,450,862,
82.6507,78.7458,51.456,um,Surface,Position,450,863,
122.475,124.163,65.161,um,Surface,Position,450,864,
53.4343,88.5108,68.0254,um,Surface,Position,450,865,
60.7374,89.0784,48.3015,um,Surface,Position,450,866,
92.5544,57.2156,43.4214,um,Surface,Position,450,867,
84.1686,67.708,35.541,um,Surface,Position,450,868,
88.788,55.0467,76.9016,um,Surface,Position,450,869,
56.7377,91.2573,56.6309,um,Surface,Position,450,870,
93.6894,56.255,59.3847,um,Surface,Position,450,871,
65.8033,76.1969,84.1162,um,Surface,Position,450,872,
58.1921,88.6688,63.7851,um,Surface,Position,450,873,
86.6904,67.2587,42.4903,um,Surface,Position,450,874,
82.7266,61.2611,80.2854,um,Surface,Position,450,875,
76.0849,66.942,84.5971,um,Surface,Position,450,876,
88.1739,59.5216,68.1066,um,Surface,Position,450,877,
54.9003,90.6878,39.2375,um,Surface,Position,450,878,
79.8723,54.1099,83.4139,um,Surface,Position,450,879,
59.5049,71.9742,89.3944,um,Surface,Position,450,880,
89.5634,46.6682,79.1005,um,Surface,Position,450,881,
74.5423,54.8845,96.4533,um,Surface,Position,450,882,
89.695,49.6095,67.5306,um,Surface,Position,450,883,
55.3598,81.8745,76.9362,um,Surface,Position,450,884,
61.0197,86.3064,42.2442,um,Surface,Position,450,885,
78.6821,57.9792,88.9065,um,Surface,Position,450,886,
79.3266,72.0668,32.812,um,Surface,Position,450,887,
93.5453,51.3104,54.2626,um,Surface,Position,450,888,
94.7514,48.1317,61.9703,um,Surface,Position,450,889,
84.741,50.1001,84.724,um,Surface,Position,450,890,
93.5475,45.4417,71.0399,um,Surface,Position,450,891,
58.4502,83.648,28.3044,um,Surface,Position,450,892,
72.0309,74.4001,26.1366,um,Surface,Position,450,893,
64.1549,79.5571,29.4453,um,Surface,Position,450,894,
95.4109,43.1947,53.9995,um,Surface,Position,450,895,
78.1286,69.6768,25.0137,um,Surface,Position,450,896,
66.3873,64.5543,91.4418,um,Surface,Position,450,897,
83.3164,49.9583,77.1424,um,Surface,Position,450,898,
45.0867,93.1384,54.7149,um,Surface,Position,450,899,
95.6162,46.964,48.5242,um,Surface,Position,450,900,
52.7725,78.9259,84.4794,um,Surface,Position,450,901,
91.8068,51.5911,43.6271,um,Surface,Position,450,902,
72.734,80.3571,34.6134,um,Surface,Position,450,903,
89.2887,58.5547,37.6203,um,Surface,Position,450,904,
65.1451,63.3217,85.5561,um,Surface,Position,450,905,
88.6673,41.0622,69.6082,um,Surface,Position,450,906,
77.004,62.7511,23.7651,um,Surface,Position,450,907,
47.3511,72.7755,87.924,um,Surface,Position,450,908,
89.763,46.3732,39.8578,um,Surface,Position,450,909,
47.8219,89.5479,35.9745,um,Surface,Position,450,910,
75.4163,49.2823,91.0222,um,Surface,Position,450,911,
88.6232,49.8655,34.7229,um,Surface,Position,450,912,
45.5542,88.7941,63.0911,um,Surface,Position,450,913,
48.2795,91.4182,46.3748,um,Surface,Position,450,914,
70.0896,56.3602,92.2489,um,Surface,Position,450,915,
38.7776,92.3445,63.2792,um,Surface,Position,450,916,
54.4792,83.7382,34.2153,um,Surface,Position,450,917,
81.874,60.4739,31.2145,um,Surface,Position,450,918,
94.0299,40.2183,61.4071,um,Surface,Position,450,919,
34.8792,83.9074,73.3222,um,Surface,Position,450,920,
48.8767,81.4153,30.7244,um,Surface,Position,450,921,
43.1834,86.5966,37.1177,um,Surface,Position,450,922,
40.1881,88.9644,41.7516,um,Surface,Position,450,923,
63.2306,73.0409,27.245,um,Surface,Position,450,924,
82.0874,41.5952,81.7037,um,Surface,Position,450,925,
37.4787,86.2538,65.7973,um,Surface,Position,450,926,
65.2484,50.3806,93.7459,um,Surface,Position,450,927,
85.2261,37.1418,75.945,um,Surface,Position,450,928,
94.1089,40.2493,44.2294,um,Surface,Position,450,929,
41.8957,83.5328,74.0857,um,Surface,Position,450,930,
51.89,86.0095,31.64,um,Surface,Position,450,931,
38.448,91.823,52.9424,um,Surface,Position,450,932,
75.9944,44.3562,85.5451,um,Surface,Position,450,933,
66.6695,42.3259,91.6676,um,Surface,Position,450,934,
56.4954,73.2842,21.6857,um,Surface,Position,450,935,
87.666,36.3977,38.8532,um,Surface,Position,450,936,
55.785,56.7041,95.1114,um,Surface,Position,450,937,
46.2895,64.6774,92.2121,um,Surface,Position,450,938,
34.5736,88.6824,48.5871,um,Surface,Position,450,939,
90.5001,33.3104,56.077,um,Surface,Position,450,940,
90.4428,34.0147,46.1491,um,Surface,Position,450,941,
31.4015,88.0736,63.4869,um,Surface,Position,450,942,
40.796,76.1693,82.4682,um,Surface,Position,450,943,
76.9529,54.5246,21.3578,um,Surface,Position,450,944,
86.7645,34.3076,65.5932,um,Surface,Position,450,945,
34.7048,88.8024,57.0397,um,Surface,Position,450,946,
65.9467,68.0139,23.2983,um,Surface,Position,450,947,
34.9788,74.6976,76.2238,um,Surface,Position,450,948,
76.6657,29.7605,83.2484,um,Surface,Position,450,949,
41.5393,81.975,29.9746,um,Surface,Position,450,950,
70.6466,36.1257,87.9544,um,Surface,Position,450,951,
69.947,56.9282,16.2068,um,Surface,Position,450,952,
29.4641,88.0917,43.8897,um,Surface,Position,450,953,
40.2598,64.4086,88.0696,um,Surface,Position,450,954,
57.8528,47.3304,92.9971,um,Surface,Position,450,955,
80.4344,28.9726,77.3101,um,Surface,Position,450,956,
84.4659,43.3813,32.6084,um,Surface,Position,450,957,
52.1472,77.7917,25.5265,um,Surface,Position,450,958,
30.0457,87.8315,53.5775,um,Surface,Position,450,959,
81.7262,52.4043,26.776,um,Surface,Position,450,960,
84.2751,30.3005,69.405,um,Surface,Position,450,961,
39.0522,78.1543,25.5746,um,Surface,Position,450,962,
51.8146,68.4724,17.963,um,Surface,Position,450,963,
82.547,32.1111,34.6986,um,Surface,Position,450,964,
82.3198,24.912,61.9462,um,Surface,Position,450,965,
34.5581,68.352,80.9328,um,Surface,Position,450,966,
58.2932,65.8904,20.415,um,Surface,Position,450,967,
34.9587,82.9556,34.2883,um,Surface,Position,450,968,
42.8497,57.4055,91.0734,um,Surface,Position,450,969,
77.6778,44.3132,24.6188,um,Surface,Position,450,970,
86.3445,27.0412,51.9252,um,Surface,Position,450,971,
85.2334,31.0592,42.0883,um,Surface,Position,450,972,
27.2741,85.4068,58.2102,um,Surface,Position,450,973,
30.6724,78.9804,72.9381,um,Surface,Position,450,974,
65.861,60.2108,21.3378,um,Surface,Position,450,975,
82.9953,22.3751,48.8707,um,Surface,Position,450,976,
31.2597,79.4041,36.9207,um,Surface,Position,450,977,
45.8794,72.0596,21.0876,um,Surface,Position,450,978,
51.7184,40.9033,92.8411,um,Surface,Position,450,979,
77.7121,24.3458,70.7697,um,Surface,Position,450,980,
44.8161,50.8567,92.7024,um,Surface,Position,450,981,
25.3964,83.2406,50.5974,um,Surface,Position,450,982,
70.467,47.4221,19.1318,um,Surface,Position,450,983,
61.9261,35.7766,90.822,um,Surface,Position,450,984,
80.0367,37.9747,28.4618,um,Surface,Position,450,985,
25.8615,81.3178,64.908,um,Surface,Position,450,986,
70.9894,29.9782,84.7078,um,Surface,Position,450,987,
28.6764,76.4872,31.9641,um,Surface,Position,450,988,
33.985,57.3367,88.8282,um,Surface,Position,450,989,
35.3964,73.7669,25.0687,um,Surface,Position,450,990,
56.2996,52.9448,13.2008,um,Surface,Position,450,991,
78.0368,26.7432,33.4528,um,Surface,Position,450,992,
79.5064,20.8162,55.89,um,Surface,Position,450,993,
63.4922,27.8122,87.9759,um,Surface,Position,450,994,
46.8882,63.5398,17.7189,um,Surface,Position,450,995,
76.1941,18.9406,72.138,um,Surface,Position,450,996,
71.2001,41.2911,23.8058,um,Surface,Position,450,997,
63.3964,51.5534,18.221,um,Surface,Position,450,998,
56.9144,58.7161,15.8916,um,Surface,Position,450,999,
23.6036,79.7257,57.4607,um,Surface,Position,450,1000,
25.3732,74.6228,71.6113,um,Surface,Position,450,1001,
75.1371,21.0002,36.9775,um,Surface,Position,450,1002,
48.5106,32.3388,87.076,um,Surface,Position,450,1003,
56.7441,25.736,84.7662,um,Surface,Position,450,1004,
18.842,74.7424,53.9284,um,Surface,Position,450,1005,
21.8943,66.1402,73.7431,um,Surface,Position,450,1006,
25.9518,72.9978,27.7188,um,Surface,Position,450,1007,
67.5688,21.1139,76.2982,um,Surface,Position,450,1008,
20.3483,73.181,62.4091,um,Surface,Position,450,1009,
73.0939,31.6161,27.946,um,Surface,Position,450,1010,
61.7409,45.2922,16.1685,um,Surface,Position,450,1011,
40.249,44.7821,92.5671,um,Surface,Position,450,1012,
19.0327,80.9867,48.0706,um,Surface,Position,450,1013,
79.4505,22.1601,42.51,um,Surface,Position,450,1014,
24.2502,80.6452,39.2049,um,Surface,Position,450,1015,
65.6075,28.1162,28.8597,um,Surface,Position,450,1016,
39.0343,37.5904,87.2346,um,Surface,Position,450,1017,
71.714,16.7198,65.2318,um,Surface,Position,450,1018,
64.2078,34.2045,22.6469,um,Surface,Position,450,1019,
28.0398,57.5282,82.4018,um,Surface,Position,450,1020,
63.445,17.3756,77.8716,um,Surface,Position,450,1021,
22.9491,72.7767,33.7362,um,Surface,Position,450,1022,
17.592,75.7665,42.0763,um,Surface,Position,450,1023,
38.7745,65.1028,21.1575,um,Surface,Position,450,1024,
32.9618,49.4714,84.2315,um,Surface,Position,450,1025,
41.5034,59.3652,18.5723,um,Surface,Position,450,1026,
18.6578,69.3468,67.0659,um,Surface,Position,450,1027,
49.5782,52.4655,16.7997,um,Surface,Position,450,1028,
55.682,48.163,16.6969,um,Surface,Position,450,1029,
66.363,19.346,38.7873,um,Surface,Position,450,1030,
45.5066,47.1734,16.7913,um,Surface,Position,450,1031,
20.0637,56.4415,73.9879,um,Surface,Position,450,1032,
32.6735,57.7729,25.7145,um,Surface,Position,450,1033,
16.3032,64.9906,59.7193,um,Surface,Position,450,1034,
33.2978,40.0861,85.3248,um,Surface,Position,450,1035,
21.8282,67.052,29.8993,um,Surface,Position,450,1036,
49.7575,43.2388,19.3023,um,Surface,Position,450,1037,
49.7664,24.0593,87.8516,um,Surface,Position,450,1038,
18.559,69.1867,45.1479,um,Surface,Position,450,1039,
29.0894,64.3189,24.7195,um,Surface,Position,450,1040,
42.3203,52.9116,16.4302,um,Surface,Position,450,1041,
58.9053,19.6148,75.5223,um,Surface,Position,450,1042,
72.4697,17.2314,49.0698,um,Surface,Position,450,1043,
15.4642,62.1121,51.8855,um,Surface,Position,450,1044,
59.9393,21.6519,30.1482,um,Surface,Position,450,1045,
58.2689,13.8596,69.5047,um,Surface,Position,450,1046,
53.4301,36.4285,20.2878,um,Surface,Position,450,1047,
32.084,52.56,21.7007,um,Surface,Position,450,1048,
64.9468,14.2712,56.0861,um,Surface,Position,450,1049,
55.2185,29.7123,25.3638,um,Surface,Position,450,1050,
39.6904,46.7594,23.5129,um,Surface,Position,450,1051,
13.3986,66.1354,46.2601,um,Surface,Position,450,1052,
53.2472,19.332,78.747,um,Surface,Position,450,1053,
22.4247,61.955,33.4141,um,Surface,Position,450,1054,
65.0409,12.096,64.5341,um,Surface,Position,450,1055,
67.1184,15.3436,45.1945,um,Surface,Position,450,1056,
16.0152,68.4706,36.8509,um,Surface,Position,450,1057,
43.5288,37.0345,19.007,um,Surface,Position,450,1058,
23.948,56.1385,32.0303,um,Surface,Position,450,1059,
27.2296,40.9626,78.9289,um,Surface,Position,450,1060,
47.5703,33.4423,25.1702,um,Surface,Position,450,1061,
31.692,32.6216,81.1553,um,Surface,Position,450,1062,
15.4116,62.3236,39.1013,um,Surface,Position,450,1063,
25.56,53.5649,25.6603,um,Surface,Position,450,1064,
59.6488,15.0569,42.5015,um,Surface,Position,450,1065,
50.1362,17.9518,72.6653,um,Surface,Position,450,1066,
37.0661,47.2759,19.6751,um,Surface,Position,450,1067,
45.335,40.8853,22.2054,um,Surface,Position,450,1068,
21.7322,47.146,74.0591,um,Surface,Position,450,1069,
16.5051,54.2167,67.0435,um,Surface,Position,450,1070,
39.3487,25.8642,85.2723,um,Surface,Position,450,1071,
52.0815,13.2316,61.0957,um,Surface,Position,450,1072,
13.5453,55.3262,49.0992,um,Surface,Position,450,1073,
22.4162,50.2114,32.2492,um,Surface,Position,450,1074,
47.8265,13.5051,69.2686,um,Surface,Position,450,1075,
34.0235,40.4237,26.5485,um,Surface,Position,450,1076,
38.2747,36.7615,25.3284,um,Surface,Position,450,1077,
16.991,47.8822,67.5095,um,Surface,Position,450,1078,
51.3833,24.6832,30.1795,um,Surface,Position,450,1079,
30.5094,45.6507,26.2774,um,Surface,Position,450,1080,
14.879,58.3477,61.2176,um,Surface,Position,450,1081,
18.1575,57.7636,35.3068,um,Surface,Position,450,1082,
54.8252,20.2796,35.5729,um,Surface,Position,450,1083,
44.4825,21.2579,78.0568,um,Surface,Position,450,1084,
57.8084,13.0316,54.2194,um,Surface,Position,450,1085,
22.4322,30.0318,73.5287,um,Surface,Position,450,1086,
34.6231,33.1995,29.8638,um,Surface,Position,450,1087,
45.7954,13.4396,50.6604,um,Surface,Position,450,1088,
22.888,35.9623,68.2794,um,Surface,Position,450,1089,
29.2628,24.4169,78.9142,um,Surface,Position,450,1090,
18.5278,42.9598,59.3665,um,Surface,Position,450,1091,
16.1658,50.9506,40.4831,um,Surface,Position,450,1092,
13.7404,49.4501,60.1054,um,Surface,Position,450,1093,
37.6281,21.138,71.4926,um,Surface,Position,450,1094,
28.6582,31.2383,74.6581,um,Surface,Position,450,1095,
40.2526,31.9998,26.6212,um,Surface,Position,450,1096,
52.6651,13.748,46.4315,um,Surface,Position,450,1097,
25.9684,45.2754,31.4786,um,Surface,Position,450,1098,
13.9704,55.4738,36.7857,um,Surface,Position,450,1099,
38.9009,25.9477,33.2652,um,Surface,Position,450,1100,
16.0121,41.468,40.4052,um,Surface,Position,450,1101,
39.9297,16.2242,63.9468,um,Surface,Position,450,1102,
10.9685,42.7695,55.33,um,Surface,Position,450,1103,
14.5781,38.4126,62.526,um,Surface,Position,450,1104,
22.0818,37.6597,40.4253,um,Surface,Position,450,1105,
13.1884,45.7052,43.5677,um,Surface,Position,450,1106,
30.5649,32.7977,34.6325,um,Surface,Position,450,1107,
30.8282,23.8936,69.255,um,Surface,Position,450,1108,
25.7585,40.3247,32.9991,um,Surface,Position,450,1109,
16.3465,45.1046,52.3879,um,Surface,Position,450,1110,
46.108,16.5261,38.4738,um,Surface,Position,450,1111,
45.6273,21.6277,36.946,um,Surface,Position,450,1112,
42.5342,15.874,54.874,um,Surface,Position,450,1113,
31.5353,21.7385,46.3318,um,Surface,Position,450,1114,
25.6524,22.3255,49.1337,um,Surface,Position,450,1115,
34.0772,13.2539,54.8052,um,Surface,Position,450,1116,
24.4934,25.7344,57.1709,um,Surface,Position,450,1117,
29.1796,19.6183,57.3156,um,Surface,Position,450,1118,
19.2651,32.5399,54.3691,um,Surface,Position,450,1119,
14.7697,36.3284,53.8179,um,Surface,Position,450,1120,
23.1464,30.1782,49.8061,um,Surface,Position,450,1121,
30.4119,17.2631,65.6037,um,Surface,Position,450,1122,
28.1866,29.2668,41.29,um,Surface,Position,450,1123,
37.9964,17.8504,47.0464,um,Surface,Position,450,1124,
19.1952,29.5545,64.6024,um,Surface,Position,450,1125,
36.3798,18.4212,54.6903,um,Surface,Position,450,1126,
36.1689,22.5417,40.0369,um,Surface,Position,450,1127,

## Sheet: Pos_0007_end
Detailed
====================
Position X,Position Y,Position Z,Unit,Category,Collection,Time,ID,
66.5025,104.004,70.0257,um,Surface,Position,450,557,
73.2758,103.648,57.3996,um,Surface,Position,450,558,
67.188,100.253,81.2328,um,Surface,Position,450,559,
87.7811,82.6873,83.5073,um,Surface,Position,450,560,
102.773,78.0877,48.8137,um,Surface,Position,450,561,
77.3493,92.8403,86.69,um,Surface,Position,450,562,
80.7169,101.639,41.3273,um,Surface,Position,450,563,
78.5345,98.3698,77.5899,um,Surface,Position,450,564,
89.1546,94.6356,45.6919,um,Surface,Position,450,565,
97.4664,77.551,77.0882,um,Surface,Position,450,566,
95.9251,89.4035,52.7468,um,Surface,Position,450,567,
102.776,77.1521,65.9695,um,Surface,Position,450,568,
87.5525,95.8918,60.8304,um,Surface,Position,450,569,
95.1572,86.316,66.9427,um,Surface,Position,450,570,
65.1926,89.8836,93.7649,um,Surface,Position,450,571,
64.48,106.055,45.9947,um,Surface,Position,450,572,
100.054,64.8208,74.7126,um,Surface,Position,450,573,
88.8334,69.721,90.5629,um,Surface,Position,450,574,
99.8884,76.6753,37.8772,um,Surface,Position,450,575,
103.924,65.7326,57.498,um,Surface,Position,450,576,
93.5049,84.7654,32.0999,um,Surface,Position,450,577,
85.5863,93.1517,31.381,um,Surface,Position,450,578,
56.4778,105.865,53.8927,um,Surface,Position,450,579,
103.352,64.4563,40.2655,um,Surface,Position,450,580,
96.9098,74.1021,31.6522,um,Surface,Position,450,581,
53.0608,103.685,75.0561,um,Surface,Position,450,582,
76.3748,82.0361,93.8777,um,Surface,Position,450,583,
93.9379,64.2447,83.9974,um,Surface,Position,450,584,
58.2888,99.2149,85.1875,um,Surface,Position,450,585,
94.3597,67.0868,23.8922,um,Surface,Position,450,586,
99.6014,52.5054,70.4837,um,Surface,Position,450,587,
57.2361,87.2072,96.3259,um,Surface,Position,450,588,
88.3939,81.7457,22.782,um,Surface,Position,450,589,
97.3654,48.3447,80.6328,um,Surface,Position,450,590,
76.9471,71.5346,99.8522,um,Surface,Position,450,591,
85.8791,62.314,94.0351,um,Surface,Position,450,592,
103.841,54.3925,55.9015,um,Surface,Position,450,593,
38.5751,103.943,66.3369,um,Surface,Position,450,594,
102.027,50.8492,41.3178,um,Surface,Position,450,595,
55.8938,100.37,28.7138,um,Surface,Position,450,596,
42.49,102.222,76.5167,um,Surface,Position,450,597,
74.8497,90.6139,18.4896,um,Surface,Position,450,598,
49.8438,104.328,41.4171,um,Surface,Position,450,599,
60.9651,98.9645,25.8885,um,Surface,Position,450,600,
101.297,46.0407,57.4705,um,Surface,Position,450,601,
90.9821,57.8384,18.327,um,Surface,Position,450,602,
83.7827,69.9658,13.2059,um,Surface,Position,450,603,
68.4513,65.1837,101.721,um,Surface,Position,450,604,
41.1116,96.9801,83.5059,um,Surface,Position,450,605,
45.0935,103.001,51.4135,um,Surface,Position,450,606,
87.4702,48.7564,88.2525,um,Surface,Position,450,607,
42.7116,103.544,56.7263,um,Surface,Position,450,608,
99.8828,50.2462,36.7957,um,Surface,Position,450,609,
41.0355,99.0076,37.0556,um,Surface,Position,450,610,
69.1389,82.0137,11.9731,um,Surface,Position,450,611,
44.1278,77.5361,98.6557,um,Surface,Position,450,612,
99.1205,41.3082,50.5625,um,Surface,Position,450,613,
54.6819,69.5632,102.16,um,Surface,Position,450,614,
80.7009,67.6649,7.2484,um,Surface,Position,450,615,
95.2674,60.4155,25.1156,um,Surface,Position,450,616,
85.4076,63.9327,12.7574,um,Surface,Position,450,617,
81.2897,52.6224,11.4133,um,Surface,Position,450,618,
84.4037,34.073,79.0333,um,Surface,Position,450,619,
31.6321,96.6857,72.5004,um,Surface,Position,450,620,
94.5752,39.2952,36.192,um,Surface,Position,450,621,
70.9506,49.912,99.7532,um,Surface,Position,450,622,
94.5211,36.0558,62.9501,um,Surface,Position,450,623,
51.6773,81.5572,13.4942,um,Surface,Position,450,624,
22.4992,88.5959,78.4297,um,Surface,Position,450,625,
76.4722,54.2316,7.67234,um,Surface,Position,450,626,
88.4654,29.4359,63.3527,um,Surface,Position,450,627,
30.2195,86.6713,87.2084,um,Surface,Position,450,628,
23.8277,94.2938,65.6281,um,Surface,Position,450,629,
46.7479,89.4805,20.0632,um,Surface,Position,450,630,
33.5948,78.0688,94.0718,um,Surface,Position,450,631,
22.768,91.5361,56.0577,um,Surface,Position,450,632,
76.9232,49.7694,8.37462,um,Surface,Position,450,633,
63.3232,41.8546,97.5358,um,Surface,Position,450,634,
38.6809,85.5824,21.9052,um,Surface,Position,450,635,
30.0185,92.8532,49.2402,um,Surface,Position,450,636,
44.6117,62.0376,102.006,um,Surface,Position,450,637,
84.6099,44.9203,16.5087,um,Surface,Position,450,638,
75.8386,34.3772,88.3721,um,Surface,Position,450,639,
23.6805,85.8917,40.8749,um,Surface,Position,450,640,
86.2125,27.8303,41.6473,um,Surface,Position,450,641,
29.664,69.6032,93.4218,um,Surface,Position,450,642,
49.3008,51.7234,101.536,um,Surface,Position,450,643,
33.5493,84.8022,25.524,um,Surface,Position,450,644,
80.3736,40.2291,12.8031,um,Surface,Position,450,645,
27.1766,85.734,34.4927,um,Surface,Position,450,646,
44.4472,44.1104,97.5916,um,Surface,Position,450,647,
17.0095,82.8873,63.5256,um,Surface,Position,450,648,
36.332,54.7455,99.2562,um,Surface,Position,450,649,
75.1251,23.7307,75.7201,um,Surface,Position,450,650,
34.2388,80.2223,22.0921,um,Surface,Position,450,651,
82.8463,31.6926,25.5849,um,Surface,Position,450,652,
57.4297,64.7629,7.22362,um,Surface,Position,450,653,
51.3492,37.5521,95.4667,um,Surface,Position,450,654,
43.0032,66.5567,11.6265,um,Surface,Position,450,655,
68.4357,27.0729,83.6154,um,Surface,Position,450,656,
19.2699,71.1038,81.3279,um,Surface,Position,450,657,
19.1629,82.8548,53.1275,um,Surface,Position,450,658,
56.5515,28.1603,89.3575,um,Surface,Position,450,659,
33.817,71.1973,17.547,um,Surface,Position,450,660,
27.1777,55.4041,94.9651,um,Surface,Position,450,661,
14.5631,78.2499,53.5514,um,Surface,Position,450,662,
20.8137,65.8164,85.8841,um,Surface,Position,450,663,
16.0746,76.6066,70.3898,um,Surface,Position,450,664,
64.5045,23.1477,83.8369,um,Surface,Position,450,665,
22.3708,60.0301,88.2992,um,Surface,Position,450,666,
23.2598,73.3597,29.5232,um,Surface,Position,450,667,
64.6851,37.2614,12.5564,um,Surface,Position,450,668,
61.6382,41.066,4.50473,um,Surface,Position,450,669,
73.3704,18.9625,44.1132,um,Surface,Position,450,670,
73.4961,21.2196,38.9693,um,Surface,Position,450,671,
72.3164,26.3356,26.1661,um,Surface,Position,450,672,
71.0775,29.6718,21.5149,um,Surface,Position,450,673,
42.7169,48.1006,13.0465,um,Surface,Position,450,674,
49.4792,45.8963,10.9855,um,Surface,Position,450,675,
57.4699,17.2138,75.1526,um,Surface,Position,450,676,
25.3604,65.3466,22.8095,um,Surface,Position,450,677,
14.5643,72.0145,43.9939,um,Surface,Position,450,678,
15.0038,70.3113,63.6031,um,Surface,Position,450,679,
71.4998,17.0843,57.6005,um,Surface,Position,450,680,
37.5531,41.4816,92.8216,um,Surface,Position,450,681,
31.7022,53.9418,17.5776,um,Surface,Position,450,682,
10.3893,62.3766,58.8156,um,Surface,Position,450,683,
48.5029,23.3636,75.1341,um,Surface,Position,450,684,
59.6329,15.9204,62.2259,um,Surface,Position,450,685,
24.3852,46.8066,86.5183,um,Surface,Position,450,686,
19.1172,53.9789,75.4986,um,Surface,Position,450,687,
44.2868,24.4187,85.6075,um,Surface,Position,450,688,
13.6179,58.7412,68.7302,um,Surface,Position,450,689,
25.1504,33.0942,71.9424,um,Surface,Position,450,690,
11.3991,52.6795,57.3275,um,Surface,Position,450,691,
50.8475,16.2706,59.648,um,Surface,Position,450,692,
10.7221,60.3001,46.9318,um,Surface,Position,450,693,
28.3585,34.4966,80.3732,um,Surface,Position,450,694,
21.1247,54.4988,27.8536,um,Surface,Position,450,695,
44.8276,35.2631,18.9822,um,Surface,Position,450,696,
61.3397,16.9415,47.3914,um,Surface,Position,450,697,
24.6876,31.1461,42.7222,um,Surface,Position,450,698,
24.6133,41.7193,28.4818,um,Surface,Position,450,699,
14.5809,43.7028,60.1774,um,Surface,Position,450,700,
33.0771,34.2413,26.8888,um,Surface,Position,450,701,
29.4028,27.4867,67.2723,um,Surface,Position,450,702,
46.0864,18.5875,45.6691,um,Surface,Position,450,703,
42.2752,17.5083,48.7033,um,Surface,Position,450,704,
46.869,23.5056,32.3004,um,Surface,Position,450,705,
25.8212,29.2454,40.4726,um,Surface,Position,450,706,
28.547,24.882,51.5479,um,Surface,Position,450,707,
17.5797,36.3525,51.7218,um,Surface,Position,450,708,
15.302,44.5512,43.2362,um,Surface,Position,450,709,
35.0992,20.1575,59.545,um,Surface,Position,450,710,
39.2375,22.5929,37.5614,um,Surface,Position,450,711,
35.0485,22.6141,69.4356,um,Surface,Position,450,712,
18.5711,38.1024,66.0153,um,Surface,Position,450,713,

## Sheet: Pos_0008_end
Detailed
====================
Position X,Position Y,Position Z,Unit,Category,Collection,Time,ID,
130.476,85.4837,59.8474,um,Surface,Position,450,426,
124.279,97.4902,51.0003,um,Surface,Position,450,427,
92.4114,121.173,80.2868,um,Surface,Position,450,428,
124.071,88.5141,89.2829,um,Surface,Position,450,429,
107.195,107.996,91.3405,um,Surface,Position,450,430,
127.419,94.4007,63.8784,um,Surface,Position,450,431,
98.9465,121.332,69.1589,um,Surface,Position,450,432,
126.683,91.9967,77.8947,um,Surface,Position,450,433,
111.083,113.926,60.1424,um,Surface,Position,450,434,
115.251,110.218,59.7715,um,Surface,Position,450,435,
107.046,113.466,82.1909,um,Surface,Position,450,436,
110.255,112.789,77.6599,um,Surface,Position,450,437,
119.128,105.312,72.6527,um,Surface,Position,450,438,
83.579,116.569,93.924,um,Surface,Position,450,439,
107.944,107.618,37.2529,um,Surface,Position,450,440,
109.119,82.2452,107.054,um,Surface,Position,450,441,
85.9802,124.773,52.3872,um,Surface,Position,450,442,
132.351,73.1367,71.8523,um,Surface,Position,450,443,
81.7743,122.574,80.4195,um,Surface,Position,450,444,
90.973,109.185,102.607,um,Surface,Position,450,445,
100.508,97.9749,106.505,um,Surface,Position,450,446,
90.6202,124.146,53.98,um,Surface,Position,450,447,
108.596,87.8128,106.276,um,Surface,Position,450,448,
128.125,63.5287,84.2582,um,Surface,Position,450,449,
119.25,89.8504,35.7597,um,Surface,Position,450,450,
117.546,68.251,102.034,um,Surface,Position,450,451,
86.8798,101.189,110.309,um,Surface,Position,450,452,
78.6493,125.012,70.6294,um,Surface,Position,450,453,
95.3605,117.016,36.4038,um,Surface,Position,450,454,
84.8612,123.503,43.0393,um,Surface,Position,450,455,
126.844,84.742,44.7242,um,Surface,Position,450,456,
117.451,94.6365,36.174,um,Surface,Position,450,457,
61.0854,122.593,77.4546,um,Surface,Position,450,458,
62.3419,123.892,69.6144,um,Surface,Position,450,459,
128.903,57.201,75.9346,um,Surface,Position,450,460,
131.97,60.4996,61.3405,um,Surface,Position,450,461,
71.5514,110.305,102.801,um,Surface,Position,450,462,
129.85,68.9864,46.1996,um,Surface,Position,450,463,
123.675,63.098,93.5047,um,Surface,Position,450,464,
89.0325,92.1731,114.81,um,Surface,Position,450,465,
69.525,120.416,86.9917,um,Surface,Position,450,466,
89.3633,107.097,20.5968,um,Surface,Position,450,467,
101.679,65.5369,111.503,um,Surface,Position,450,468,
113.67,84.2583,23.5995,um,Surface,Position,450,469,
67.515,123.309,40.7099,um,Surface,Position,450,470,
61.237,115.133,93.3735,um,Surface,Position,450,471,
121.164,75.8118,29.0962,um,Surface,Position,450,472,
98.7715,101.978,23.8156,um,Surface,Position,450,473,
64.2149,125.589,63.2139,um,Surface,Position,450,474,
69.5658,104.237,109.406,um,Surface,Position,450,475,
77.096,109.84,19.897,um,Surface,Position,450,476,
127.664,47.5499,57.4579,um,Surface,Position,450,477,
51.9115,122.354,66.5294,um,Surface,Position,450,478,
52.9181,117.777,83.9175,um,Surface,Position,450,479,
119.186,48.8914,94.3293,um,Surface,Position,450,480,
113.167,55.1963,101.736,um,Surface,Position,450,481,
83.0943,74.517,117.559,um,Surface,Position,450,482,
57.8298,124.611,51.0411,um,Surface,Position,450,483,
75.5647,88.089,115.51,um,Surface,Position,450,484,
113.183,39.5621,94.6351,um,Surface,Position,450,485,
109.507,67.8278,15.5268,um,Surface,Position,450,486,
84.8068,61.3369,117.773,um,Surface,Position,450,487,
58.9187,115.171,29.1431,um,Surface,Position,450,488,
46.4143,107.239,94.9914,um,Surface,Position,450,489,
55.0389,97.3545,108.904,um,Surface,Position,450,490,
99.0462,83.1347,9.77575,um,Surface,Position,450,491,
124.392,42.2439,69.4973,um,Surface,Position,450,492,
90.5906,98.2002,14.2588,um,Surface,Position,450,493,
121.671,36.8912,51.6978,um,Surface,Position,450,494,
116.043,52.29,25.9257,um,Surface,Position,450,495,
40.4492,109.885,84.0758,um,Surface,Position,450,496,
121.956,45.5479,39.3512,um,Surface,Position,450,497,
42.7918,119.13,56.5253,um,Surface,Position,450,498,
51.2866,116.658,35.8413,um,Surface,Position,450,499,
106.594,42.8058,100.262,um,Surface,Position,450,500,
75.9444,101.716,13.6319,um,Surface,Position,450,501,
79.7409,86.0279,5.54708,um,Surface,Position,450,502,
31.9185,112.099,66.4025,um,Surface,Position,450,503,
65.6656,64.6689,117.419,um,Surface,Position,450,504,
105.082,57.0795,13.5694,um,Surface,Position,450,505,
98.1799,37.2773,104.173,um,Surface,Position,450,506,
88.6659,79.2166,4.33012,um,Surface,Position,450,507,
116.77,30.6705,69.2007,um,Surface,Position,450,508,
63.0781,105.215,17.1632,um,Surface,Position,450,509,
94.7164,45.5378,109.865,um,Surface,Position,450,510,
116.522,35.2163,83.523,um,Surface,Position,450,511,
61.1372,89.5377,10.1115,um,Surface,Position,450,512,
105.507,24.3214,82.8171,um,Surface,Position,450,513,
46.6508,103.577,24.2418,um,Surface,Position,450,514,
78.418,46.5551,114.417,um,Surface,Position,450,515,
36.646,93.3477,99.0656,um,Surface,Position,450,516,
30.7421,105.006,75.1983,um,Surface,Position,450,517,
34.9348,111.648,42.111,um,Surface,Position,450,518,
40.5003,110.498,33.1835,um,Surface,Position,450,519,
25.4884,104.065,58.8068,um,Surface,Position,450,520,
76.0692,72.2024,2.22715,um,Surface,Position,450,521,
48.4312,97.4917,18.7173,um,Surface,Position,450,522,
110.896,27.3363,43.4034,um,Surface,Position,450,523,
105.312,31.7704,29.0093,um,Surface,Position,450,524,
29.9635,94.0007,91.5538,um,Surface,Position,450,525,
90.3476,61.7179,4.63945,um,Surface,Position,450,526,
101.138,30.6073,22.3379,um,Surface,Position,450,527,
100.51,15.9786,63.1144,um,Surface,Position,450,528,
33.9495,77.1766,105.333,um,Surface,Position,450,529,
66.1453,45.0889,114.28,um,Surface,Position,450,530,
82.836,31.3801,105.296,um,Surface,Position,450,531,
24.8375,95.6187,78.8378,um,Surface,Position,450,532,
100.848,20.7139,81.787,um,Surface,Position,450,533,
19.4849,93.7635,54.9832,um,Surface,Position,450,534,
54.3334,76.9704,6.39389,um,Surface,Position,450,535,
91.1267,41.3371,11.104,um,Surface,Position,450,536,
25.9327,96.3299,37.9689,um,Surface,Position,450,537,
21.1796,94.7513,65.02,um,Surface,Position,450,538,
45.9352,58.0524,112.11,um,Surface,Position,450,539,
55.3807,48.9003,114.643,um,Surface,Position,450,540,
64.0445,73.6814,3.92864,um,Surface,Position,450,541,
75.0329,62.6728,2.68072,um,Surface,Position,450,542,
65.0297,24.1389,99.5209,um,Surface,Position,450,543,
91.567,25.7988,26.1853,um,Surface,Position,450,544,
17.91,82.0107,73.3571,um,Surface,Position,450,545,
23.5593,79.2088,89.491,um,Surface,Position,450,546,
63.0114,61.6867,5.01204,um,Surface,Position,450,547,
84.0114,18.8705,91.0747,um,Surface,Position,450,548,
39.2516,86.8196,16.9406,um,Surface,Position,450,549,
91.8059,14.2084,74.1378,um,Surface,Position,450,550,
97.4433,18.8373,39.0402,um,Surface,Position,450,551,
22.8235,93.7614,41.2404,um,Surface,Position,450,552,
83.5068,26.6285,21.506,um,Surface,Position,450,553,
81.0734,10.6336,72.2192,um,Surface,Position,450,554,
18.6324,82.3468,43.5718,um,Surface,Position,450,555,
78.2445,36.4575,13.8156,um,Surface,Position,450,556,
26.1008,81.3028,28.8893,um,Surface,Position,450,557,
38.8162,48.0488,106.016,um,Surface,Position,450,558,
83.5785,21.2859,32.305,um,Surface,Position,450,559,
89.2169,16.1288,38.4183,um,Surface,Position,450,560,
86.0877,10.8007,61.2699,um,Surface,Position,450,561,
64.5609,31.3207,23.134,um,Surface,Position,450,562,
50.5211,27.4002,98.2181,um,Surface,Position,450,563,
77.9923,10.6071,46.3983,um,Surface,Position,450,564,
77.2993,25.1131,27.064,um,Surface,Position,450,565,
67.82,40.8459,9.0873,um,Surface,Position,450,566,
52.7903,54.0996,9.52892,um,Surface,Position,450,567,
15.4758,77.326,54.737,um,Surface,Position,450,568,
85.0651,11.9918,44.1708,um,Surface,Position,450,569,
26.0691,56.3941,95.5291,um,Surface,Position,450,570,
15.4476,66.4358,60.1473,um,Surface,Position,450,571,
56.7003,39.6181,12.2604,um,Surface,Position,450,572,
65.366,27.3497,23.2794,um,Surface,Position,450,573,
65.4085,34.2485,18.8903,um,Surface,Position,450,574,
40.9856,54.0807,15.7263,um,Surface,Position,450,575,
36.6673,63.2137,17.3897,um,Surface,Position,450,576,
75.2676,14.7483,37.9673,um,Surface,Position,450,577,
41.0816,33.5006,98.9965,um,Surface,Position,450,578,
18.0473,61.4563,80.0676,um,Surface,Position,450,579,
50.5679,13.3179,57.3,um,Surface,Position,450,580,
58.955,9.77946,65.0591,um,Surface,Position,450,581,
61.3056,12.9294,42.9698,um,Surface,Position,450,582,
56.6168,12.0359,75.4962,um,Surface,Position,450,583,
26.5426,41.7409,85.361,um,Surface,Position,450,584,
48.135,43.5742,17.2112,um,Surface,Position,450,585,
17.8413,67.5553,42.6935,um,Surface,Position,450,586,
31.9758,38.6825,93.8052,um,Surface,Position,450,587,
66.332,21.0091,31.6789,um,Surface,Position,450,588,
50.5512,20.842,89.2797,um,Surface,Position,450,589,
30.7303,44.9791,30.3077,um,Surface,Position,450,590,
21.2968,41.5194,63.8157,um,Surface,Position,450,591,
41.8153,21.8094,77.8002,um,Surface,Position,450,592,
50.9904,27.9973,27.7406,um,Surface,Position,450,593,
18.303,50.5421,58.21,um,Surface,Position,450,594,
24.5981,52.8083,32.9381,um,Surface,Position,450,595,
37.7029,44.3791,22.5298,um,Surface,Position,450,596,
21.7399,44.8423,76.4136,um,Surface,Position,450,597,
47.8046,35.5827,23.7481,um,Surface,Position,450,598,
36.3952,28.9765,86.3225,um,Surface,Position,450,599,
48.0653,21.7663,38.51,um,Surface,Position,450,600,
31.2357,33.7377,43.887,um,Surface,Position,450,601,
38.5357,19.2674,55.9375,um,Surface,Position,450,602,
35.1978,22.1314,66.6669,um,Surface,Position,450,603,
32.9636,36.8742,33.625,um,Surface,Position,450,604,
23.1447,43.2287,48.9604,um,Surface,Position,450,605,
28.3022,33.4781,76.6411,um,Surface,Position,450,606,
56.6895,16.5982,28.5028,um,Surface,Position,450,607,
41.8457,23.6575,39.4385,um,Surface,Position,450,608,
46.3935,17.8411,76.3531,um,Surface,Position,450,609,

## Sheet: Pos_0009_end
Detailed
====================
Position X,Position Y,Position Z,Unit,Category,Collection,Time,ID,
65.6532,103.704,72.6571,um,Surface,Position,391,431,
98.1004,67.8765,82.0913,um,Surface,Position,391,432,
69.7999,91.4197,98.0254,um,Surface,Position,391,433,
99.4896,71.3969,71.2424,um,Surface,Position,391,434,
80.036,85.7375,94.067,um,Surface,Position,391,435,
97.535,77.7461,64.0507,um,Surface,Position,391,436,
72.4929,96.4164,89.4153,um,Surface,Position,391,437,
78.6909,98.4141,64.0316,um,Surface,Position,391,438,
92.9487,83.3054,75.3733,um,Surface,Position,391,439,
92.0009,87.6467,66.9714,um,Surface,Position,391,440,
76.5189,99.5445,72.7212,um,Surface,Position,391,441,
85.2874,89.0369,84.3158,um,Surface,Position,391,442,
84.4283,94.7721,70.8712,um,Surface,Position,391,443,
78.6068,97.1476,79.3265,um,Surface,Position,391,444,
92.4289,80.159,45.629,um,Surface,Position,391,445,
61.8805,97.8636,91.5909,um,Surface,Position,391,446,
60.1334,101.769,82.9465,um,Surface,Position,391,447,
73.9016,99.9625,50.8742,um,Surface,Position,391,448,
83.8355,81.2864,95.164,um,Surface,Position,391,449,
92.6905,69.6666,94.2128,um,Surface,Position,391,450,
65.8594,83.6939,106.499,um,Surface,Position,391,451,
57.9506,105.534,66.1184,um,Surface,Position,391,452,
101.27,60.07,73.842,um,Surface,Position,391,453,
83.1171,89.5616,40.8796,um,Surface,Position,391,454,
100.073,68.327,54.7711,um,Surface,Position,391,455,
96.0936,66.5175,46.1257,um,Surface,Position,391,456,
92.5138,59.2506,98.0625,um,Surface,Position,391,457,
68.4421,98.2227,43.2779,um,Surface,Position,391,458,
61.2894,104.043,48.9223,um,Surface,Position,391,459,
76.6079,72.5741,106.703,um,Surface,Position,391,460,
57.9744,91.2249,102.118,um,Surface,Position,391,461,
98.8412,56.483,86.6101,um,Surface,Position,391,462,
78.4465,51.2739,109.108,um,Surface,Position,391,463,
53.5493,78.3554,110.405,um,Surface,Position,391,464,
98.5286,44.5885,81.3562,um,Surface,Position,391,465,
93.9297,46.602,93.581,um,Surface,Position,391,466,
49.2666,98.1976,89.2391,um,Surface,Position,391,467,
101.374,53.4339,59.243,um,Surface,Position,391,468,
84.7015,64.267,104.576,um,Surface,Position,391,469,
86.6668,42.2156,99.2147,um,Surface,Position,391,470,
70.0842,61.1957,113.548,um,Surface,Position,391,471,
95.952,50.4778,46.2683,um,Surface,Position,391,472,
99.4012,43.1989,61.05,um,Surface,Position,391,473,
63.3497,71.2909,113.035,um,Surface,Position,391,474,
43.1245,90.3699,100.285,um,Surface,Position,391,475,
48.2488,83.7418,107.023,um,Surface,Position,391,476,
43.6165,72.8914,111.499,um,Surface,Position,391,477,
94.4459,35.8308,80.882,um,Surface,Position,391,478,
68.9797,50.7618,113.407,um,Surface,Position,391,479,
96.3236,36.5488,69.9625,um,Surface,Position,391,480,
38.8815,101.798,54.4383,um,Surface,Position,391,481,
44.7658,97.3788,42.7866,um,Surface,Position,391,482,
72.568,81.0018,23.5797,um,Surface,Position,391,483,
52.2641,71.1976,112.684,um,Surface,Position,391,484,
25.9444,94.7017,69.2317,um,Surface,Position,391,485,
87.5045,45.4603,39.5547,um,Surface,Position,391,486,
49.4251,62.0276,113.76,um,Surface,Position,391,487,
75.7874,39.975,108.409,um,Surface,Position,391,488,
57.6322,55.7598,114.819,um,Surface,Position,391,489,
94.2995,40.184,47.8638,um,Surface,Position,391,490,
48.696,91.3875,31.7594,um,Surface,Position,391,491,
88.3124,36.0401,42.4253,um,Surface,Position,391,492,
90.4662,28.428,62.4842,um,Surface,Position,391,493,
67.3312,39.8961,109.667,um,Surface,Position,391,494,
48.0409,84.9201,26.8668,um,Surface,Position,391,495,
32.0625,79.0451,101.146,um,Surface,Position,391,496,
53.9842,52.2515,123.314,um,Surface,Position,391,497,
70.277,65.9615,22.1329,um,Surface,Position,391,498,
23.0432,90.3972,55.8748,um,Surface,Position,391,499,
67.8617,32.5993,106.437,um,Surface,Position,391,500,
58.7458,67.5664,20.3996,um,Surface,Position,391,501,
76.3795,29.8054,100.194,um,Surface,Position,391,502,
24.0562,79.9125,93.2019,um,Surface,Position,391,503,
88.2964,26.2084,73.6967,um,Surface,Position,391,504,
17.5676,82.2025,77.5333,um,Surface,Position,391,505,
81.1006,31.3602,36.6803,um,Surface,Position,391,506,
33.8463,80.87,31.2562,um,Surface,Position,391,507,
83.9276,21.3439,65.3832,um,Surface,Position,391,508,
80.7998,22.7223,82.1387,um,Surface,Position,391,509,
36.5978,58.1293,109.136,um,Surface,Position,391,510,
84.9426,26.3333,51.9928,um,Surface,Position,391,511,
27.5749,71.75,99.8259,um,Surface,Position,391,512,
69.2417,20.022,91.8962,um,Surface,Position,391,513,
75.4304,35.302,30.1356,um,Surface,Position,391,514,
24.6341,82.5122,40.7249,um,Surface,Position,391,515,
66.8987,45.8762,22.7048,um,Surface,Position,391,516,
59.2,54.9069,20.3672,um,Surface,Position,391,517,
53.4574,35.5897,108.367,um,Surface,Position,391,518,
47.6909,44.3067,111.428,um,Surface,Position,391,519,
23.1049,69.9521,97.1732,um,Surface,Position,391,520,
41.9213,64.1939,23.2178,um,Surface,Position,391,521,
53.1352,29.9084,104.716,um,Surface,Position,391,522,
78.7819,18.3512,59.4186,um,Surface,Position,391,523,
18.4633,81.7093,50.6446,um,Surface,Position,391,524,
34.4787,47.3403,107.344,um,Surface,Position,391,525,
14.8226,81.5348,62.4675,um,Surface,Position,391,526,
79.4266,23.2217,45.3999,um,Surface,Position,391,527,
63.275,24.4174,98.4135,um,Surface,Position,391,528,
69.5826,16.5489,79.6064,um,Surface,Position,391,529,
41.8108,33.9012,103.659,um,Surface,Position,391,530,
18.8579,75.2187,41.5456,um,Surface,Position,391,531,
26.3932,71.373,31.8755,um,Surface,Position,391,532,
47.3143,54.6668,21.457,um,Surface,Position,391,533,
71.2711,26.5116,34.1977,um,Surface,Position,391,534,
15.8727,69.5025,86.2288,um,Surface,Position,391,535,
74.3709,16.2076,70.6994,um,Surface,Position,391,536,
38.0137,52.4227,24.5114,um,Surface,Position,391,537,
55.4666,35.2099,25.2049,um,Surface,Position,391,538,
49.841,42.1121,23.4894,um,Surface,Position,391,539,
71.8759,16.3766,50.8088,um,Surface,Position,391,540,
31.6424,41.5948,101.632,um,Surface,Position,391,541,
19.936,56.0467,93.5347,um,Surface,Position,391,542,
49.6696,25.2415,99.8197,um,Surface,Position,391,543,
12.1904,72.5536,71.9087,um,Surface,Position,391,544,
15.5687,52.3597,84.4658,um,Surface,Position,391,545,
64.6783,14.0882,52.7268,um,Surface,Position,391,546,
35.5598,30.1289,97.1147,um,Surface,Position,391,547,
57.3754,14.1202,76.7369,um,Surface,Position,391,548,
47.416,20.9882,91.7151,um,Surface,Position,391,549,
65.5631,19.1908,39.7164,um,Surface,Position,391,550,
23.6602,44.1215,94.6033,um,Surface,Position,391,551,
55.0323,17.8446,84.1406,um,Surface,Position,391,552,
38.7318,39.0075,27.4223,um,Surface,Position,391,553,
10.177,58.7757,60.1065,um,Surface,Position,391,554,
47.4697,16.3839,77.9176,um,Surface,Position,391,555,
52.4956,26.8579,29.5864,um,Surface,Position,391,556,
39.7649,23.1398,90.6371,um,Surface,Position,391,557,
62.2508,14.0368,63.263,um,Surface,Position,391,558,
27.5071,55.714,29.6568,um,Surface,Position,391,559,
19.7483,62.912,36.5623,um,Surface,Position,391,560,
39.2105,18.6296,73.3337,um,Surface,Position,391,561,
47.9389,14.1193,59.4491,um,Surface,Position,391,562,
24.6343,31.1173,85.6658,um,Surface,Position,391,563,
12.7151,47.6066,73.1538,um,Surface,Position,391,564,
53.5177,18.4727,38.4531,um,Surface,Position,391,565,
33.9629,23.2118,84.3902,um,Surface,Position,391,566,
54.4722,14.7216,47.5223,um,Surface,Position,391,567,
43.5924,32.0775,30.0758,um,Surface,Position,391,568,
37.3939,18.249,65.2216,um,Surface,Position,391,569,
35.931,27.8523,37.4694,um,Surface,Position,391,570,
44.4065,17.4627,45.7287,um,Surface,Position,391,571,
17.3973,37.834,72.4385,um,Surface,Position,391,572,
23.1151,31.0797,77.186,um,Surface,Position,391,573,
11.8807,49.8342,54.9842,um,Surface,Position,391,574,
30.9239,36.1143,34.225,um,Surface,Position,391,575,
22.964,44.4929,36.0301,um,Surface,Position,391,576,
25.6401,27.5282,51.857,um,Surface,Position,391,577,
25.3232,31.8869,44.4703,um,Surface,Position,391,578,
33.1484,23.1992,48.7726,um,Surface,Position,391,579,
38.9008,17.3984,55.2892,um,Surface,Position,391,580,
18.8607,34.0566,62.7134,um,Surface,Position,391,581,
30.3137,22.1003,61.1703,um,Surface,Position,391,582,
26.2147,26.416,70.002,um,Surface,Position,391,583,
21.2799,37.5758,43.8727,um,Surface,Position,391,584,

[truncated: 10 more sheets: Pos_0010_end, Pos_0011_end, Po_0012_end, Pos_0013_end, Pos_0014_end, Pos_0015_end, Pos_0016_end, Pos_0017_end, Pos_0018_end, Pos_0019_end]
