# Supplementary material for: Tracking cells in epithelial acini by light sheet microscopy reveals proximity effects in breast cancer initiation
Source: eLife. 2020 Jul 21;9:e54066. doi: 10.7554/eLife.54066 (PMC7373425; doi:10.7554/eLife.54066)
Supplement: Supplementary file 4. — This file was input into the source code to carry out the acinus feature analysis described in Figure 4b and Figure 4—figure supplement 1. [file elife-54066-supp4.xlsx]

## Sheet: Label_0000
Label	Tumor?
3393
3412
3382
3428	1
3404
3438
3488
3475
3405
3402
3443
3439
3468
3422	1
3432
3416
3426

## Sheet: Label_0001
Label	Tumor?
619
616	1
592	1
604
630
578

## Sheet: Label_0002
Label	Tumor?
340
309

## Sheet: Label_0003
Label	Tumor?
266
273
282
274
277
281
293
292
285
297
323
361
358
372
362
376
369
368	1
366
357
370
340
339
349
342
350
373
287	1
290
301
315
305

## Sheet: Label_0004
Label	Tumor?
386
378
358
353	1
305
309
275
318

## Sheet: Label_0005
Label	Tumor?
356
367	1
369
374
370
394
357
359

## Sheet: Label_0006
Label	Tumor?
795
697
568
642
805
723

## Sheet: Label_0007
Label	Tumor?
554
555
547
467
518
553
522
462
487

## Sheet: Label_0008
Label	Tumor?
417	1
325
318	1
313
317
337
329	1
350
307
306

## Sheet: Label_0009
Label	Tumor?
353
362
316
320

[truncated: 10 more sheets: Label_0010, Label_0011, Label_0012, Label_0013, Label_0014, Label_0015, Label_0016, Label_0017, Label_0018, Label_0019]
